# Supplementary material
Source: PubMed Central journal article supplement (PMC3757343)
Supplement: NIHMS503617-supplement-supplementary.pdf [file NIHMS503617-supplement-supplementary.pdf]

# Identification of multiple risk variants for ankylosing spondylitis through high-density genotyping of immune-related loci

International Genetics of Ankylosing Spondylitis Consortium (IGAS)

Supplementary Online Material:

Supplementary Tables 1-11

Supplementary Figures 1-12

Supplementary Note

**Supplementary Table 1** Association *P*-values for the combined analysis after correcting for genomic inflation factor ( $\lambda_{1000} = 1.0285$ ).

| SNP             | Locus | Position    | Combined <i>P</i> -value | Combined <i>P</i> <sub>corrected</sub> -value |
|-----------------|-------|-------------|--------------------------|-----------------------------------------------|
| rs6600247       | 1p36  | 25,177,701  | $2.6 \times 10^{-15}$    | $6.48 \times 10^{-15}$                        |
| rs11209026      | 1p31  | 67,478,546  | $2.0 \times 10^{-27}$    | $1.10 \times 10^{-26}$                        |
| rs4129267       | 1q21  | 152,692,888 | $3.4 \times 10^{-13}$    | $7.54 \times 10^{-13}$                        |
| rs1801274       | 1q23  | 159,746,369 | $1.4 \times 10^{-09}$    | $2.36 \times 10^{-09}$                        |
| rs41299637      | 1q32  | 199,144,473 | $1.9 \times 10^{-15}$    | $4.72 \times 10^{-15}$                        |
| rs6759298       | 2p15  | 62,421,949  | $4.9 \times 10^{-47}$    | $1.03 \times 10^{-45}$                        |
| rs12615545      | 2q31  | 181,756,697 | $1.0 \times 10^{-09}$    | $1.80 \times 10^{-09}$                        |
| rs4676410       | 2q37  | 241,212,412 | $9.9 \times 10^{-09}$    | $1.62 \times 10^{-08}$                        |
| rs12186979      | 5p13  | 40,560,617  | $4.3 \times 10^{-06}$    | $5.87 \times 10^{-06}$                        |
| rs30187         | 5q15  | 96,150,086  | $4.4 \times 10^{-45}$    | $8.07 \times 10^{-44}$                        |
| rs6871626       | 5q33  | 158,759,370 | $3.1 \times 10^{-08}$    | $4.95 \times 10^{-08}$                        |
| rs17765610      | 6q15  | 90,722,494  | $5.3 \times 10^{-08}$    | $8.30 \times 10^{-08}$                        |
| rs1128905       | 9q34  | 138,373,660 | $7.0 \times 10^{-09}$    | $1.15 \times 10^{-08}$                        |
| rs1250550       | 10q22 | 80,730,323  | $1.5 \times 10^{-09}$    | $2.53 \times 10^{-09}$                        |
| rs11190133      | 10q24 | 101,268,715 | $4.9 \times 10^{-14}$    | $1.12 \times 10^{-13}$                        |
| rs1860545       | 12p13 | 6,317,038   | $2.8 \times 10^{-10}$    | $2.53 \times 10^{-09}$                        |
| rs11065898      | 12q24 | 110,346,958 | $4.7 \times 10^{-08}$    | $7.37 \times 10^{-08}$                        |
| rs11624293      | 14q31 | 87,558,574  | $1.5 \times 10^{-10}$    | $2.75 \times 10^{-10}$                        |
| imm_16_28525386 | 16p11 | 28,525,386  | $2.6 \times 10^{-09}$    | $4.41 \times 10^{-09}$                        |
| rs2531875       | 17q11 | 23,172,294  | $1.2 \times 10^{-10}$    | $2.25 \times 10^{-10}$                        |

|            |       |            |                       |                        |
|------------|-------|------------|-----------------------|------------------------|
| rs9901869  | 17q21 | 42,930,205 | $6.0 \times 10^{-15}$ | $1.49 \times 10^{-14}$ |
| rs35164067 | 19p13 | 10,386,181 | $3.4 \times 10^{-10}$ | $6.17 \times 10^{-10}$ |
| rs2836883  | 21q22 | 39,388,614 | $6.5 \times 10^{-17}$ | $1.81 \times 10^{-16}$ |
| rs7282490  | 21q22 | 44,440,169 | $6.2 \times 10^{-09}$ | $1.03 \times 10^{-08}$ |

**Supplementary Table 2** Suggestive associations ( $5 \times 10^{-08} < P\text{-value} < 5 \times 10^{-07}$ ) with ankylosing spondylitis susceptibility. Locus plots for reported associations are in Supplementary Figure 5.

| SNP        | Locus | Position <sup>a</sup> | Nearby gene(s)     | Combined P-value      | Risk/Non-risk allele | Combined OR | European                             |      |                        | East Asian                           |      |                        |
|------------|-------|-----------------------|--------------------|-----------------------|----------------------|-------------|--------------------------------------|------|------------------------|--------------------------------------|------|------------------------|
|            |       |                       |                    |                       |                      |             | Risk Allele Frequency (Case/Control) | OR   | P-value                | Risk Allele Frequency (Case/Control) | OR   | P-value                |
| rs12758027 | 1q32  | 208,861,431           | <i>HHAT</i>        | $3.7 \times 10^{-07}$ | C/T                  | 1.09        | 0.479/0.453                          | 1.09 | $6.03 \times 10^{-06}$ | 0.558/0.518                          | 1.22 | $9.61 \times 10^{-04}$ |
| rs4851529  | 2q11  | 102,013,732           | <i>IL1R2-IL1R1</i> | $1.0 \times 10^{-07}$ | G/A                  | 1.10        | 0.630/0.609                          | 1.10 | $1.02 \times 10^{-06}$ | 0.497/0.472                          | 1.09 | 0.087                  |
| rs13093489 | 3p24  | 27,769,911            | <i>EOMES</i>       | $8.8 \times 10^{-08}$ | A/C                  | 1.10        | 0.361/0.334                          | 1.12 | $1.05 \times 10^{-07}$ | 0.441/0.424                          | 1.07 | 0.262                  |
| rs11742270 | 5p13  | 35,917,200            | <i>IL7R</i>        | $5.4 \times 10^{-07}$ | G/A                  | 1.11        | 0.750/0.728                          | 1.11 | $1.89 \times 10^{-06}$ | 0.855/0.837                          | 1.12 | 0.063                  |
| rs2402752  | 7q31  | 124,226,835           | <i>GPR37</i>       | $4.8 \times 10^{-07}$ | T/C                  | 1.10        | 0.727/0.706                          | 1.11 | $2.44 \times 10^{-06}$ | 0.736/0.724                          | 1.08 | 0.161                  |
| rs2283790  | 22q11 | 20,286,653            | <i>UBE2L3</i>      | $7.9 \times 10^{-08}$ | G/A                  | 1.12        | 0.216/0.196                          | 1.12 | $1.15 \times 10^{-06}$ | 0.468/0.439                          | 1.15 | 0.029                  |

**a)** NCBI human genome build 36 coordinates.

**Supplementary Table 3** TaqMan genotyping of 2,998 east Asian cases and 5,547 east Asian controls of the non-MHC SNPs reported to be associated to AS susceptibility in the Han Chinese populations (8).

| SNP        | Call Rate | Controls HWE test <i>P</i> -value | Genotypes    |             | Association <i>P</i> -value |
|------------|-----------|-----------------------------------|--------------|-------------|-----------------------------|
|            |           |                                   | Controls     | Cases       |                             |
| rs4552569  | 0.974     | 0.412                             | 975/933/210  | 825/704/158 | 0.212                       |
| rs13210693 | 0.967     | 0.018                             | 540/1071/491 | 479/806/406 | 0.098                       |
| rs17905830 | 0.978     | 0.243                             | 1630/462/21  | 1336/359/28 | 0.178                       |

**Supplementary Table 4** HLA-B\*27 interactions. Epistasis (interaction term significant at  $P$ -value  $< 5 \times 10^{-5}$ ) was assessed via logistic regression as described in the methods. The term  $\beta_1$  corresponds to the SNP effect and  $\beta_{12}$  to the interaction effect. See Supplementary Figure 4 for experiment wide HLA-B\*27 correlations in controls and in cases and Q-Q plot of the interaction term for non-MHC SNPs.

| SNP        | LD (r) with HLA-B*27 |         | $\beta_1$ (se)   | $P$ -value | $\beta_{12}$ (se) | $P$ -value             |
|------------|----------------------|---------|------------------|------------|-------------------|------------------------|
|            | Controls             | Cases   |                  |            |                   |                        |
| rs30187    | -0.0052              | 0.0543  | -0.0016 (0.0477) | 0.9727     | 0.3897 (0.0586)   | $2.94 \times 10^{-11}$ |
| rs10045403 | 0.0115               | -0.0482 | -0.0591 (0.0519) | 0.2545     | -0.2819 (0.0636)  | $9.29 \times 10^{-6}$  |

**Supplementary Table 5** Lymphocyte counts and AS susceptibility. SNPs associated ( $P$ -value  $< 5 \times 10^{-3}$ ) with at least one lymphocyte trait (CD4 T cells, CD8 T cells or the ratio CD4:CD8) and AS susceptibility are listed. Linkage disequilibrium between SNPs was computed using reference data from 1000 Genomes Project and paired SNPs had  $D' > 0.6$ . Coupled alleles correspond to the positively correlated alleles between two paired SNPs.

| Locus    | Gene          | SNP        | Allele | CD4    |                       | CD8    |                       | CD4:CD8 |                       | AS associated SNP | Risk/Non-risk Allele | LD (R <sup>2</sup> /D') | Coupling |
|----------|---------------|------------|--------|--------|-----------------------|--------|-----------------------|---------|-----------------------|-------------------|----------------------|-------------------------|----------|
|          |               |            |        | Beta   | P-value               | Beta   | P-value               | Beta    | P-value               |                   |                      |                         |          |
| chr1p36  | <i>RUNX3</i>  | rs876109   | C (T)  | -0.022 | 0.5                   | -0.125 | $9.10 \times 10^{-5}$ | 0.118   | $2.50 \times 10^{-4}$ | rs6600247         | C/T                  | 0.24/0.62               | C,C      |
| chr5p13  | <i>IL7R</i>   | rs991570   | A (G)  | 0.056  | 0.091                 | -0.033 | 0.0027                | -0.048  | 0.143                 | rs11742270        | G/A                  | 0.25/0.93               | A,G      |
| chr5p13  | <i>PTGER4</i> | rs16869602 | T (C)  | -0.054 | 0.43                  | -0.235 | $5.6 \times 10^{-4}$  | 0.204   | 0.0029                | rs62358232        | C/G                  | 0.01/0.70               | T,C      |
| chr5q15  | <i>ERAP1</i>  | rs2042381  | G (A)  | -0.059 | 0.088                 | 0.065  | 0.055                 | -0.125  | $2.70 \times 10^{-4}$ | rs30187           | T/C                  | 0.70/0.98               | A,T      |
| chr6q15  | <i>BACH2</i>  | rs2026637  | T (G)  | -0.303 | $4.60 \times 10^{-4}$ | -0.153 | 0.075                 | -0.105  | 0.22                  | rs17765610        | G/A                  | 0.01/1.00               | T,G      |
| chr10q22 | <i>ZMIZ1</i>  | rs1782648  | G (A)  | -0.033 | 0.31                  | 0.032  | $4.2 \times 10^{-3}$  | 0.074   | 0.021                 | rs1250550         | G/T                  | 0.93/0.98               | G,G      |
| chr12q24 | <i>SH2B3</i>  | rs11066054 | T (G)  | -0.171 | $3.80 \times 10^{-5}$ | 0.002  | 0.96                  | -0.162  | $9.40 \times 10^{-5}$ | rs11065898        | T/C                  | 0.60/0.90               | T,T      |
| chr19p13 | <i>TYK2</i>   | rs10416653 | C (T)  | 0.22   | 0.002                 | 0.135  | 0.056                 | 0.053   | 0.45                  | rs35164067        | G/A                  | 0.01/1.00               | T,G      |

**Supplementary Table 6** HLA-B\*27 tagging performance by previously reported tag SNPs and rs116488202.

**Supplementary Table 6a** Validation datasets used to assess HLA-B\*27 performance. Samples of British, Australia and China with PCR based HLA-B\*27 typing.

|                   | British & Australian |           | China      |          |
|-------------------|----------------------|-----------|------------|----------|
|                   | Cases                | Controls  | Cases      | Controls |
| Number            | 542                  | 754       | 104        | 5        |
| HLA-B*27 positive | 489 (90.2%)          | 67 (8.9%) | 89 (85.6%) | 0 (0.0%) |

**Supplementary Table 6b** HLA-B\*27 tagging performance.  $r^2$ , correlation based on genotype allele counts.

| SNP         | Position <sup>a</sup> | Alleles<br>(Minor/Major) <sup>b</sup> | British & Australian |             |             | China            |       |             |             |
|-------------|-----------------------|---------------------------------------|----------------------|-------------|-------------|------------------|-------|-------------|-------------|
|             |                       |                                       | $r^2$                | Sensitivity | Specificity | MAF <sup>c</sup> | $r^2$ | Sensitivity | Specificity |
| rs13202464  | 31,344,583            | G/A                                   | 0.826                | 0.989       | 0.934       | 0.096            | 0.821 | 0.989       | 0.917       |
| rs116488202 | 31,344,916            | T/C                                   | 0.951                | 0.989       | 0.985       | 0.011            | 0.913 | 0.989       | 1.000       |
| rs4349859   | 31,365,787            | A/G                                   | 0.930                | 0.976       | 0.988       | 0.002            | 0.033 | 0.234       | 1.000       |

a) Chromosome 6 NCBI human genome build 37 coordinates.

b) Minor allele tags the HLA-B\*27 allele.

c) Minor allele frequency from 1000 Genomes Project Phase I haplotypes (2010-11 data freeze) in European reference panel.

d) Minor allele frequency from 1000 Genomes Project Phase I haplotypes (2010-11 data freeze) in Asian reference panel.

**Supplementary Table 6c** HLA-B\*27 tag SNP allele counts in cases and controls of European ancestry. Odds ratio of disease:  $OR_{CT/CC} = 62$ ,  $OR_{TT/CC} = 105$  and  $OR_{TT/CT} = 1.7$ .

| rs116488202 |        |       |     |
|-------------|--------|-------|-----|
|             | CC     | CT    | TT  |
| Cases       | 1,254  | 7,186 | 351 |
| Controls    | 11,999 | 1,117 | 32  |



**Supplementary Table 7** HLA-A\*02 tagging performance and AS susceptibility association results in samples of European ancestry.

**Supplementary Table 7a** Correlation between rs2394250 and classical MHC alleles in 1,223 1958 Birth Cohort controls with PCR based genotypes in the *HLA-A* locus. MAF, minor allele frequency; PREV, allele prevalence; R2, Pearson correlation between *HLA-A* genotype and rs2394250 coded as 0, 1 or 2.

| <i>HLA-A</i> allele | MAF   | PREV  | R2    | Sensitivity | Specificity |
|---------------------|-------|-------|-------|-------------|-------------|
| 2                   | 0.283 | 0.482 | 0.411 | 0.669       | 0.934       |
| 1                   | 0.182 | 0.321 | 0.179 | 0.224       | 0.462       |
| 3                   | 0.130 | 0.245 | 0.112 | 0.173       | 0.594       |
| 11                  | 0.061 | 0.117 | 0.063 | 0.169       | 1.000       |
| 32                  | 0.042 | 0.083 | 0.055 | 0.118       | 0.997       |
| 24                  | 0.070 | 0.135 | 0.042 | 0.102       | 0.792       |

**Supplementary Table 7b** Association results for HLA-A\*0201 tag SNP rs2394250 in samples of European ancestry.

|                                    | All samples  |           |       |                        | HLA-B*27 negative samples <sup>a</sup> |       |       |                        |
|------------------------------------|--------------|-----------|-------|------------------------|----------------------------------------|-------|-------|------------------------|
|                                    | MAF Controls | MAF Cases | OR    | <i>P</i> -value        | Controls                               | Cases | OR    | <i>P</i> -value        |
| rs2394250                          | 0.421        | 0.53      | 1.541 | $8.00 \times 10^{-51}$ | 0.300                                  | 0.355 | 1.361 | $1.75 \times 10^{-11}$ |
| <i>conditioning on rs116488202</i> |              |           | 1.214 | $6.48 \times 10^{-12}$ |                                        |       |       |                        |

a) As tagged by rs116488202

**Supplementary Table 8** Overlap with other immune mediated diseases or immune traits. Linkage disequilibrium between the AS SNP and the disease SNP was computed from the European reference panel from the 1000 Genomes Project (see Online Methods). Coupling refers to positively correlated alleles.

| Locus                      | AS SNP                              | AS Risk/Non-risk Alleles | Coupling | Disease SNP | Disease Risk/Non-risk Alleles | Disease            | Disease OR         | LD (r <sup>2</sup> /D') | PUBMED ID | Direction               |
|----------------------------|-------------------------------------|--------------------------|----------|-------------|-------------------------------|--------------------|--------------------|-------------------------|-----------|-------------------------|
| <i>RUNX3</i>               | rs6600247                           | C/T                      | C,G      | rs10903122  | G/A                           | Celiac disease     | 1.12               | 0.99/1.00               | 20190752  | Concordant              |
| <i>IL23R</i>               | rs11209026                          | G/A                      | A,A      | rs11209026  | G/A                           | Ulcerative colitis | 1.74               | 1.00/1.00               | 21297633  | Concordant              |
|                            |                                     |                          | A,A      | rs11209026  | G/A                           | Crohn's disease    | 2.66               | 1.00/1.00               | 21102463  | Concordant              |
| <i>IL23R-IL12RB2</i>       | rs12141575 <sup>b</sup>             | T/C                      | A,A      | rs11209026  | G/A                           | Psoriasis          | 1.49               | 1.00/1.00               | 20953190  | Concordant              |
|                            |                                     |                          | A,C      | rs1495965   | G/A                           | Behcet's disease   | 1.35               | 0.51/0.99               | 20622879  | Concordant              |
| <i>GPR25-KIF21B</i>        | rs41299637                          | T/G                      | T,C      | rs7554511   | C/A                           | Ulcerative colitis | 1.19               | 1.00/1.00               | 21297633  | Concordant              |
|                            |                                     |                          | T,G      | rs296547    | G/A                           | Celiac disease     | 1.12               | 0.62/0.97               | 20190752  | Concordant              |
|                            |                                     |                          | T,T      | rs11584383  | T/C                           | Crohn's disease    | 1.18               | 0.81/0.95               | 18587394  | Concordant              |
| <i>PTGER4</i>              | rs12186979                          | C/T                      | A,T      | rs11742570  | C/T                           | Crohn's disease    | 1.33               | 0.43/0.12               | 21102463  | Concordant              |
|                            |                                     |                          | A,G      | rs6451493   | T/G                           | Ulcerative colitis | 1.08               | 0.43/0.12               | 21297633  | Concordant              |
| <i>ERAP1-ERAP2-LNPEP</i>   | rs30187<br>rs2910686 <sup>b</sup>   | T/C<br>G/A               | A,A      | rs6896969   | C/A                           | Multiple sclerosis | 1.1                | 0.41/0.11               | 19525953  | Concordant              |
|                            |                                     |                          | T,A      | rs27524     | A/G                           | Psoriasis          | 1.13               | 0.74/0.88               | 20953190  | Concordant              |
| <i>IL12B</i>               | rs6871626<br>rs6556416 <sup>b</sup> | T/G<br>G/T               | T,T      | rs2549794   | C/T                           | Crohn's disease    | 1.05               | 0.91/1.00               | 21102463  | Concordant              |
|                            |                                     |                          | A,A      | rs6871626   | A/C                           | Ulcerative colitis | 1.17               | 1.00/1.00               | 21297633  | Concordant              |
| <i>CARD9</i>               | rs1128905                           | C/T                      | A,A      | rs10045431  | C/A                           | Crohn's disease    | 1.11               | 0.89/1.00               | 18587394  | Concordant              |
|                            |                                     |                          | T,G      | rs10781499  | A/G                           | Ulcerative colitis | 1.12               | 0.55/0.85               | 21297633  | Concordant              |
| <i>LTBR-TNFRSF1A</i>       | rs1860545                           | C/T                      | T,C      | rs4077515   | T/C                           | Crohn's disease    | 1.18               | 0.57/0.87               | 21102463  | Concordant              |
|                            |                                     |                          | G,T      | rs1800693   | C/T                           | Multiple sclerosis | 1.2                | 0.96/0.98               | 19525953  | Discordant              |
| <i>NPEPP5-TBKBP1-TBX21</i> | rs9901869                           | T/C                      | T,C      | rs8070463   | T/C                           | Multiple sclerosis | 1.15               | 0.77/0.88               | 22190364  | Discordant              |
|                            |                                     |                          | G,G      | rs2836878   | G/A                           | C-reactive protein | 0.03 <sup>c</sup>  | 0.99/1.00               | 21300955  | Concordant <sup>a</sup> |
| <i>IL6R</i>                | rs4129267                           | G/A                      | G,G      | rs2836878   | G/A                           | Ulcerative colitis | 1.25               | 0.99/1.00               | 21297633  | Concordant              |
|                            |                                     |                          | C,C      | rs4537545   | T/C                           | C-reactive protein | -0.22 <sup>d</sup> | 0.96/1.00               | 19567438  | Concordant <sup>a</sup> |

|                     |                 | G,G | rs4129267  | T/C | Asthma                                  | 1.09 | 1.00/1.00 | 21907864 | Discordant |
|---------------------|-----------------|-----|------------|-----|-----------------------------------------|------|-----------|----------|------------|
| <i>FCGR2A</i>       | rs1801274       | T,T | rs1801274  | T/C | Ulcerative colitis                      | 1.21 | 1.00/1.00 | 21297633 | Concordant |
| <i>UBE2E3</i>       | rs12615545      | C,G | rs13010713 | G/A | Celiac disease                          | 1.13 | 0.81/0.91 | 20190752 | Concordant |
| <i>GPR35</i>        | rs4676410       | G,G | rs4676406  | T/G | Ulcerative colitis                      | 1.14 | 0.16/0.85 | 21297633 | Concordant |
| <i>NKX2-3</i>       | rs11190133      | C,T | rs4409764  | T/G | Crohn's disease                         | 1.22 | 0.32/0.90 | 21102463 | Concordant |
|                     |                 | C,T | rs6584283  | T/C | Ulcerative colitis                      | 1.21 | 0.32/0.90 | 21297633 | Concordant |
| <i>ZMIZ1</i>        | rs1250550       | C,G | rs1250542  | A/G | Multiple sclerosis                      | 1.15 | 0.55/0.77 | 22190364 | Discordant |
|                     |                 | C,A | rs1250552  | A/G | Celiac disease                          | 1.12 | 0.40/0.83 | 20190752 | Concordant |
|                     |                 | C,C | rs1250550  | G/T | Crohn's disease                         | 1.19 | 1.00/1.00 | 21102463 | Concordant |
| <i>SH2B3</i>        | rs11065898      | C,T | rs3184504  | T/C | Rheumatoid arthritis                    | 1.08 | 0.22/1.00 | 20453842 | Discordant |
|                     |                 | C,C | rs653178   | G/A | Type 1 diabetes                         | 1.33 | 0.22/1.00 | 19430480 | Discordant |
| <i>GPR65</i>        | rs11624293      | T,C | rs8005161  | T/C | Celiac disease                          | 1.2  | 0.22/0.99 | 20190752 | Discordant |
| <i>IL27-SULT1A1</i> | imm_16_28525386 | G,A | rs151181   | G/A | Crohn's disease                         | 1.23 | 1.00/1.00 | 21102463 | Concordant |
|                     |                 | G,G | rs4788084  | G/A | Crohn's disease                         | 1.07 | 0.84/0.83 | 21102463 | Concordant |
| <i>TYK2</i>         | rs35164067      | G,C | rs2304256  | C/A | Type 1 diabetes                         | 1.09 | 0.87/0.85 | 19430480 | Discordant |
| <i>ICOSLG</i>       | rs7282490       | A,A | rs2838519  | G/A | Type 1 diabetes                         | 1.16 | 0.52/0.96 | 19966805 | Concordant |
| <i>EOMES</i>        | rs13093489      | C,C | rs11129295 | A/G | Ulcerative colitis                      | 1.14 | 0.98/0.99 | 21297633 | Concordant |
| <i>IL7R</i>         | rs11742270      | A,T | rs6897932  | C/T | Crohn's disease                         | 1.13 | 0.94/1.00 | 18587394 | Concordant |
| <i>UBE2L3</i>       | rs2283790       | A,G | rs3194051  | G/A | Multiple sclerosis                      | 1.11 | 0.90/0.98 | 21833088 | Concordant |
|                     |                 | A,T | rs6897932  | C/T | Multiple sclerosis                      | 1.12 | 1.00/1.00 | 19525953 | Concordant |
|                     |                 | A,T | rs6897932  | C/T | Type 1 diabetes                         | 1.12 | 1.00/1.00 | 17554260 | Concordant |
|                     |                 | A,A | rs3194051  | G/A | Ulcerative colitis                      | 1.07 | 0.16/1.00 | 21297633 | Concordant |
|                     |                 | A,G | rs181359   | T/C | Crohn's disease                         | 1.1  | 1.00/1.00 | 21102463 | Concordant |
|                     |                 | A,G | rs5754217  | T/G | Systemic lupus erythematosus            | 1.38 | 1.00/1.00 | 21408207 | Concordant |
|                     |                 | A,C | rs2298428  | T/C | Celiac disease and Rheumatoid arthritis | NR   | 0.88/1.00 | 21383967 | Concordant |
|                     |                 | A,C | rs2298428  | A/G | Celiac disease                          | 1.13 | 0.88/1.00 | 20190752 | Concordant |

a) Increased susceptibility is associated with increased levels of C-reactive protein.

- b) Reported as a secondary signal in AS.
- c) Effect size of 1 unit change in the natural log transformed CPR (mg/L) per copy increment in the coded allele.
- d) Estimated absolute CRP (mg/L) effect size per copy of minor allele under an additive model adjusted for age, sex, and ethnicity.

**Supplementary Table 9** Regions of association for the primary signal of association. For each locus five windows are reported: a 2 log drop in the p-value of association from the WTCCC2/TASC meta analysis<sup>6</sup>, the ImmunoChip European plus Asian analysis, and the European analysis, respectively; a window defined based on LD patterns ( $r^2 > 0.9$ ) from ImmunoChip controls and from 1000 Genomes project European reference dataset, respectively.

| LOCUS | Gene               | Boundary Definition Method | Dataset                      | Lead SNP position | Region                  | Size    |
|-------|--------------------|----------------------------|------------------------------|-------------------|-------------------------|---------|
| 1p36  | <i>RUNX3</i>       | 2 log(P-value) drop        | WTCCC2/TASC                  | 25,169,771        | 25,163,597-25,170,995   | 7,398   |
|       |                    | 2 log(P-value) drop        | ImmunoChip combined cohorts  | 25,177,701        | 25,166,528-25,177,847   | 11,319  |
|       |                    | 2 log(P-value) drop        | ImmunoChip European cohort   | 25,177,701        | 25,166,528-25,178,260   | 11,732  |
|       |                    | R2>0.9                     | ImmunoChip combined controls | 25,177,701        | 25,162,321-25,177,701   | 15,380  |
| 1p31  | <i>IL23R</i>       | R2>0.9                     | 1000G European controls      | 25,177,701        | 25,162,321-25,177,759   | 15,438  |
|       |                    | 2 log(P-value) drop        | WTCCC2/TASC                  | 67,497,708        | 67,448,104-67,517,189   | 69,085  |
|       |                    | 2 log(P-value) drop        | ImmunoChip combined cohorts  | 67,478,546        | 67,469,657-67,498,692   | 29,035  |
|       |                    | 2 log(P-value) drop        | ImmunoChip European cohort   | 67,478,546        | 67,470,457-67,503,956   | 33,499  |
| 1q32  | <i>KIF21B</i>      | R2>0.9                     | ImmunoChip combined controls | 67,478,546        | 67,478,546-67,498,692   | 20,146  |
|       |                    | R2>0.9                     | 1000G European controls      | 67,478,546        | 67,472,503-67,516,140   | 43,637  |
|       |                    | 2 log(P-value) drop        | WTCCC2/TASC                  | 199,152,956       | 199,132,391-199,247,619 | 115,228 |
|       |                    | 2 log(P-value) drop        | ImmunoChip combined cohorts  | 199,144,473       | 199,129,678-199,265,154 | 135,476 |
| 2p15  | <i>intergenic</i>  | 2 log(P-value) drop        | ImmunoChip European cohort   | 199,144,473       | 199,129,678-199,156,456 | 26,778  |
|       |                    | R2>0.9                     | ImmunoChip combined controls | 199,144,473       | 199,141,718-199,145,350 | 3,632   |
|       |                    | R2>0.9                     | 1000G European controls      | 199,144,473       | 199,140,852-199,169,230 | 28,378  |
|       |                    | 2 log(P-value) drop        | WTCCC2/TASC                  | 62,413,836        | 62,402,788-62,423,747   | 20,959  |
| 2q11  | <i>IL1R2-IL1R1</i> | 2 log(P-value) drop        | ImmunoChip combined cohorts  | 62,421,949        | 62,404,976-62,423,747   | 18,771  |
|       |                    | 2 log(P-value) drop        | ImmunoChip European cohort   | 62,421,949        | 62,404,976-62,423,747   | 18,771  |
|       |                    | R2>0.9                     | ImmunoChip combined controls | 62,421,949        | 62,421,725-62,421,949   | 224     |
|       |                    | R2>0.9                     | 1000G European controls      | 62,421,949        | 62,421,725-62,424,077   | 2,352   |
| 2q11  | <i>IL1R2-IL1R1</i> | 2 log(P-value) drop        | WTCCC2/TASC                  | 102,013,732       | 101,977,074-102,042,561 | 65,487  |
|       |                    | 2 log(P-value) drop        | ImmunoChip combined cohorts  | 102,013,732       | 102,013,264-102,016,332 | 3,068   |
|       |                    | 2 log(P-value) drop        | ImmunoChip European cohort   | 102,013,732       | 101,846,430-102,029,252 | 182,822 |

|       |               |                     |                              |             |                         |        |
|-------|---------------|---------------------|------------------------------|-------------|-------------------------|--------|
| 5q15  | ERAP1         | R2>0.9              | Immunochip combined controls | 102,013,732 | 102,013,732-102,028,045 | 14,313 |
|       |               | R2>0.9              | 1000G European controls      | 102,013,732 | 102,013,732-102,028,045 | 14,313 |
| 5q15  | ERAP1         | 2 log(P-value) drop | WTCCC2/TASC                  | 96,147,750  | 96,144,608-96,150,203   | 5,595  |
|       |               | 2 log(P-value) drop | Immunochip combined cohorts  | 96,152,064  | 96,150,086-96,173,489   | 23,403 |
|       |               | 2 log(P-value) drop | Immunochip European cohort   | 96,152,064  | 96,135,967-96,223,958   | 87,991 |
|       |               | R2>0.9              | Immunochip combined controls | 96,152,064  | 96,147,750-96,152,064   | 4,314  |
| 12p13 | LTBR-TNFRSF1A | R2>0.9              | 1000G European controls      | 96,152,064  | 96,147,471-96152,064    | 4,593  |
|       |               | 2 log(P-value) drop | WTCCC2/TASC                  | 6,373,003   | 6,358,711-6,386,116     | 27,405 |
|       |               | 2 log(P-value) drop | Immunochip combined cohorts  | 6,361,386   | 6,357,422-6,369,794     | 12,372 |
|       |               | 2 log(P-value) drop | Immunochip European cohort   | 6,360,642   | 6,357,422-6,369,794     | 12,372 |
| 21q22 | intergenic    | R2>0.9              | Immunochip combined controls | 6,361,386   | 6,310,270-6,317,246     | 6,976  |
|       |               | R2>0.9              | 1000G European controls      | 6,361,386   | 6,310,270-6,317,251     | 6,981  |
|       |               | 2 log(P-value) drop | WTCCC2/TASC                  | 39,382,729  | 39,376,918-39,388,148   | 11,230 |
|       |               | 2 log(P-value) drop | Immunochip combined cohorts  | 39,388,614  | 39,381,402-39,389,293   | 7,891  |
| 21q22 | intergenic    | 2 log(P-value) drop | Immunochip European cohort   | 39,385,153  | 39,382,729-39,387,048   | 4,319  |
|       |               | R2>0.9              | Immunochip combined controls | 39,388,614  | 39,385,153-39,390,708   | 5,555  |
|       |               | R2>0.9              | 1000G European controls      | 39,388,614  | 39,385,153-39,389,513   | 4,360  |

**Supplementary Table 10** Heritability explained by susceptibility loci under an additive model. Allele frequency and odds ratio are as reported for samples of European ancestry. Disease prevalence 0.5%.

| Locus | Gene                 | SNP             | Risk Allele Frequency (Case/Control) | OR    | Heritability explained (%) |
|-------|----------------------|-----------------|--------------------------------------|-------|----------------------------|
| 1p36  | <i>RUNX3</i>         | rs6600247       | 0.540/0.501                          | 1.164 | 0.138                      |
| 1p31  | <i>IL23R</i>         | rs11209026      | 0.959/0.934                          | 1.650 | 0.352                      |
| 1p31  | <i>IL23R</i>         | rs12141575      | 0.370/0.330                          | 1.147 | 0.100                      |
| 1q21  | <i>IL6R</i>          | rs4129267       | 0.635/0.592                          | 1.176 | 0.151                      |
| 1q23  | <i>FCGR2A</i>        | rs1801274       | 0.487/0.476                          | 1.123 | 0.080                      |
| 1q23  | <i>FCGR2A</i>        | rs2039415       | 0.702/0.682                          | 1.088 | 0.037                      |
| 1q32  | <i>GPR25-KIF21B</i>  | rs41299637      | 0.757/0.715                          | 1.201 | 0.162                      |
| 1q32  | <i>HHAT</i>          | rs12758027      | 0.479/0.453                          | 1.094 | 0.048                      |
| 2p15  | intergenic           | rs6759298       | 0.447/0.378                          | 1.308 | 0.407                      |
| 2q11  | <i>IL1R2-IL1R1</i>   | rs4851529       | 0.630/0.609                          | 1.103 | 0.055                      |
| 2q12  | <i>IL1R2-IL1R1</i>   | rs2192752       | 0.239/0.222                          | 1.112 | 0.047                      |
| 2q31  | <i>UBE2E3</i>        | rs12615545      | 0.451/0.421                          | 1.109 | 0.062                      |
| 2q37  | <i>GPR35</i>         | rs4676410       | 0.232/0.209                          | 1.131 | 0.060                      |
| 3p24  | <i>EOMES</i>         | rs13093489      | 0.361/0.334                          | 1.119 | 0.067                      |
| 5p13  | <i>PTGER4</i>        | rs12186979      | 0.516/0.498                          | 1.093 | 0.047                      |
| 5p13  | <i>IL7R</i>          | rs11742270      | 0.750/0.728                          | 1.113 | 0.054                      |
| 5q15  | <i>ERAP1</i>         | rs30187         | 0.405/0.338                          | 1.318 | 0.411                      |
| 5q15  | <i>ERAP1</i>         | rs1065407       | 0.703/0.645                          | 1.171 | 0.136                      |
| 5q15  | <i>ERAP2</i>         | rs2910686       | 0.450/0.440                          | 1.171 | 0.147                      |
| 5q33  | <i>IL12B</i>         | rs6871626       | 0.360/0.337                          | 1.117 | 0.066                      |
| 5q33  | <i>IL12B</i>         | rs6556416       | 0.704/0.675                          | 1.107 | 0.054                      |
| 6p21  | <i>HLA-B*27</i>      | rs116488202     | 0.450/0.045                          | 60    | 20.089                     |
| 6p21  | <i>HLA-A*02</i>      | rs2394250       | 0.530/0.421                          | 1.214 | 0.220                      |
| 6q15  | <i>BACH2</i>         | rs17765610      | 0.131/0.118                          | 1.172 | 0.064                      |
| 6q15  | <i>BACH2</i>         | rs639575        | 0.624/0.609                          | 1.081 | 0.034                      |
| 7q31  | <i>GPR37</i>         | rs2402752       | 0.727/0.706                          | 1.108 | 0.052                      |
| 9q34  | <i>CARD9</i>         | rs1128905       | 0.529/0.503                          | 1.124 | 0.082                      |
| 10q22 | <i>ZMIZ1</i>         | rs1250550       | 0.678/0.652                          | 1.110 | 0.059                      |
| 10q24 | <i>NKX2-3</i>        | rs11190133      | 0.737/0.707                          | 1.181 | 0.136                      |
| 12p13 | <i>LTBR-TNFRSF1A</i> | rs1860545       | 0.634/0.605                          | 1.131 | 0.086                      |
| 12p13 | <i>LTBR-TNFRSF1A</i> | rs7954567       | 0.363/0.341                          | 1.113 | 0.062                      |
| 12q24 | <i>SH2B3</i>         | rs11065898      | 0.237/0.216                          | 1.129 | 0.060                      |
| 14q31 | <i>GPR65</i>         | rs11624293      | 0.106/0.087                          | 1.234 | 0.086                      |
| 16p11 | <i>IL27-SULT1A1</i>  | imm_16_28525386 | 0.421/0.393                          | 1.112 | 0.064                      |
| 16p11 | <i>IL27-SULT1A1</i>  | rs35448675      | 0.007/0.006                          | 1.236 | 0.007                      |
| 17q11 | <i>NOS2</i>          | rs2531875       | 0.396/0.367                          | 1.122 | 0.074                      |
| 17q11 | <i>NOS2</i>          | rs2297518       | 0.212/0.190                          | 1.129 | 0.055                      |

|       |                            |            |             |       |       |
|-------|----------------------------|------------|-------------|-------|-------|
| 17q21 | <i>NPEPPS-TBKBP1-TBX21</i> | rs9901869  | 0.548/0.516 | 1.146 | 0.111 |
| 19p13 | <i>TYK2</i>                | rs35164067 | 0.819/0.796 | 1.155 | 0.080 |
| 19p13 | <i>TYK2</i>                | rs6511701  | 0.220/0.218 | 1.098 | 0.036 |
| 21q22 | intergenic                 | rs2836883  | 0.768/0.734 | 1.190 | 0.140 |
| 21q22 | <i>ICOSLG</i>              | rs7282490  | 0.411/0.390 | 1.100 | 0.052 |
| 22q11 | <i>UBE2L3</i>              | rs2283790  | 0.216/0.196 | 1.124 | 0.052 |



**Supplementary Table 11** Association with low frequency variants.

**Supplementary Table 11a** On the background of common variant association. Linkage disequilibrium ( $r^2$  and  $D'$ ) is reported between the low frequency variants and the common variant associations in the locus reported on Table 1 and 3 used in the conditional analysis. Significance in the conditional analysis with logistic regression was also assessed by permutation, where phenotype labels were permuted 0.5M times. The reported permutation  $P$ -value is the proportion of times a test statistic was found to be greater than the observed.

| SNP           | CHR | Gene  | Position    | Change                | MAF Controls | MAF Cases | Fisher's exact test P-value |                       | Logistic regression $P$ -value after conditioning on common variant associations | LD ( $r^2/D'$ )                                                        | Permutation $P$ -value | Locus-wide Permutation $P$ -value |
|---------------|-----|-------|-------------|-----------------------|--------------|-----------|-----------------------------|-----------------------|----------------------------------------------------------------------------------|------------------------------------------------------------------------|------------------------|-----------------------------------|
|               |     |       |             |                       |              |           | OR                          | $P$ -value            |                                                                                  |                                                                        |                        |                                   |
| vh_1_67407785 | 1   | IL23R | 67,407,785  | N->K                  | 0.0014       | 0.0028    | 2.20                        | $1.47 \times 10^{-3}$ | $1.2 \times 10^{-3}$                                                             | 0.00/0.74 (rs11209026)<br>0.00/0.08 (rs12141575)                       | $2.50 \times 10^{-3}$  | 0.0526                            |
| rs76418789    | 1   | IL23R | 67,421,184  | G->R                  | 0.0058       | 0.0034    | 0.52                        | $4.59 \times 10^{-4}$ | $1.9 \times 10^{-3}$                                                             | 0.00/1.00 (rs11209026)<br>0.00/1.00 (rs12141575)                       | $1.43 \times 10^{-3}$  | 0.0554                            |
| chr1_67407799 | 1   | IL23R | 67,407,799  | R->Q                  | 0.003        | 0.0017    | 0.66                        | $9.08 \times 10^{-2}$ | $5.4 \times 10^{-3}$                                                             | 0.00/0.92 (rs11209026)<br>0.00/0.90 (rs12141575)                       | $2.49 \times 10^{-2}$  | 0.0579                            |
| rs61752351    | 5   | LNPEP | 96,341,076  | I->M                  | 0.019        | 0.023     | 1.23                        | $4.40 \times 10^{-3}$ | 0.080                                                                            | 0.03/0.91 (rs30187)<br>0.01/0.85 (rs10045403)<br>0.02/0.99 (rs2910686) | $3.87 \times 10^{-3}$  | 0.1284                            |
| rs1128905     | 9   | CARD9 | 138,379,413 | essential splice site | 0.0053       | 0.0030    | 0.57                        | $3.36 \times 10^{-3}$ | $9.2 \times 10^{-4}$                                                             | 0.00/0.98 (rs1128905)                                                  | $1.06 \times 10^{-2}$  | 0.2043                            |
| rs280518      | 19  | TYK2  | 10,333,635  | splice site           | 0.0001       | 0.0007    | 7.71                        | $2.40 \times 10^{-3}$ | 0.019                                                                            | 0.00/1.00 (rs35164067)<br>0.00/0.34 (rs6511701)                        | $7.37 \times 10^{-3}$  | 0.0332                            |
| rs35074907    | 19  | KEAP1 | 10,461,418  | snSNP                 | 0.017        | 0.021     | 1.25                        | $4.00 \times 10^{-3}$ | $2.96 \times 10^{-3}$                                                            | 0.00/0.85 (rs35164067)<br>0.00/0.87 (rs6511701)                        | $3.21 \times 10^{-3}$  | 0.0358                            |

**Supplementary Table 11b** Low frequency exonic variants in the absence of common variant associations

| SNP             | CHR | Position    | gene       | Type        | A1 | F_A    | F_U    | $P$ -value            | OR   |
|-----------------|-----|-------------|------------|-------------|----|--------|--------|-----------------------|------|
| rs61748604      | 4   | 187,396,399 | KLKB1      | splice site | B  | 0.016  | 0.0098 | $4.22 \times 10^{-7}$ | 1.61 |
| rs114661226     | 5   | 132,006,650 | RAD50      | H->Y        | A  | 0.0046 | 0.0022 | $7.20 \times 10^{-5}$ | 2.09 |
| chr6_106660076  | 6   | 106,660,076 | PRDM1      | L->F        | A  | 0.0028 | 0.0007 | $4.86 \times 10^{-7}$ | 4.06 |
| rs35411407      | 12  | 4,579,169   | DYRK4      | synonymous  | B  | 0.018  | 0.0244 | $7.41 \times 10^{-6}$ | 0.71 |
| rs11848954      | 14  | 73,486,451  | FAM161B    | G->A        | B  | 0.0055 | 0.0031 | $4.57 \times 10^{-4}$ | 1.78 |
| rs12448775      | 16  | 31,292,149  | ITGAX      | synonymous  | A  | 0.046  | 0.038  | $3.27 \times 10^{-4}$ | 1.21 |
| imm_16_49259458 | 16  | 49,259,458  | AC007608.2 | splice site | A  | 0.042  | 0.035  | $1.82 \times 10^{-4}$ | 1.23 |

**Supplementary Figure 1** Q-Q plots of association for the three analyses presented: A) all ethnicities, B) European ethnicity and C) east Asian ethnicity. Observed versus expected association for all SNPs tests are shown in blue, for all SNPs not on previously associated AS susceptibility loci are shown in orange and for a set of negative control SNPs in regions included on Immunochip for studies of reading and writing disabilities, psychosis and schizophrenia. 95% confidence intervals are shown for the expected association in the negative control SNP set. For each of the analyses, the negative control SNP lists contained SNPs that were unlinked ( $r^2 < 0.3$ ) and common (MAF  $> 0.05$ ) in the respective controls sample set. This resulted in a list of 1,922 SNPs for the all ethnicities analysis, 1,924 SNPs for the European ethnicity analysis and 1,767 SNPs for the east Asian ethnicity analysis. The genomic inflation factor in the negative control SNP list in the overall analysis was 1.047, in the white European analysis 1.110, and in the east Asian analysis 1.027.

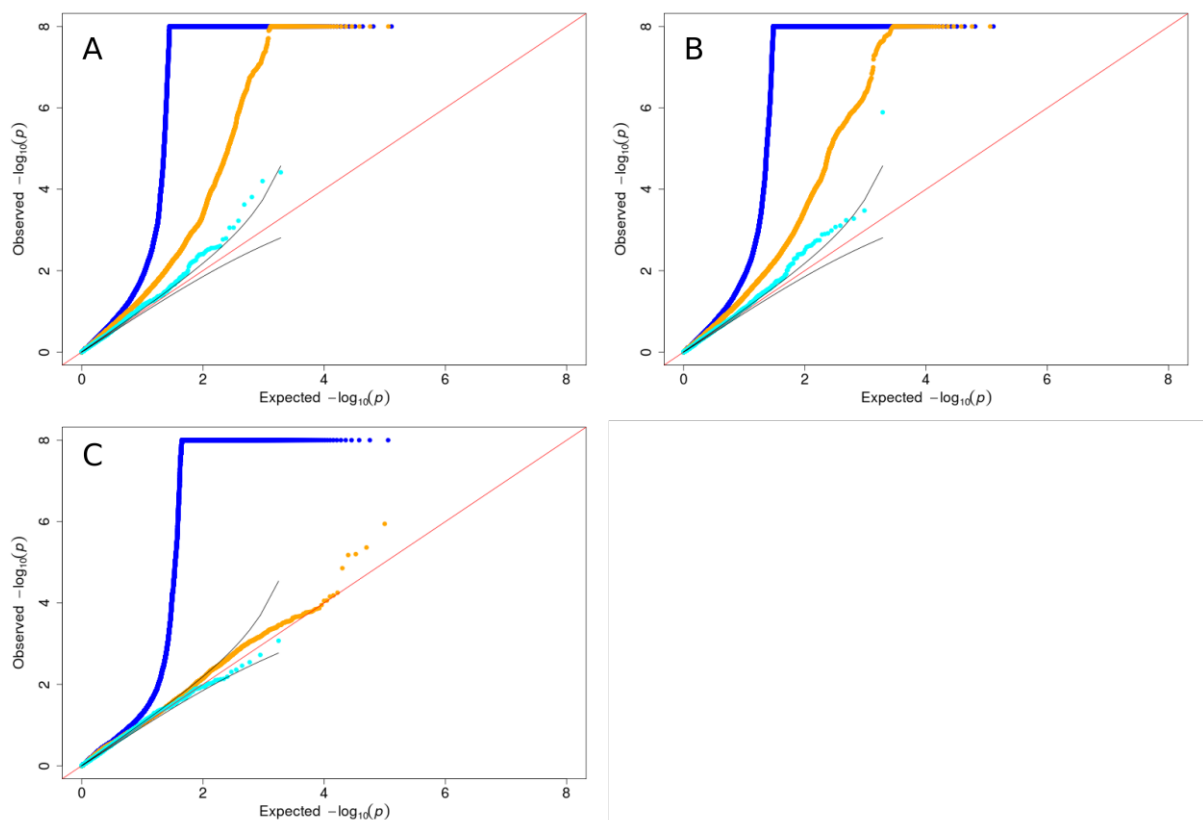

**Supplementary Figure 2** Manhattan plot in European plus Asian cohort analysis (A), European cohort analysis (B) and Asian cohort analysis (C). Association peaks in European plus Asian cohort analysis are colour-coded in red if previously identified, orange if novel genome-wide significance loci and in green if loci was identified with suggestive association ( $P$ -value  $< 5 \times 10^{-7}$ ).

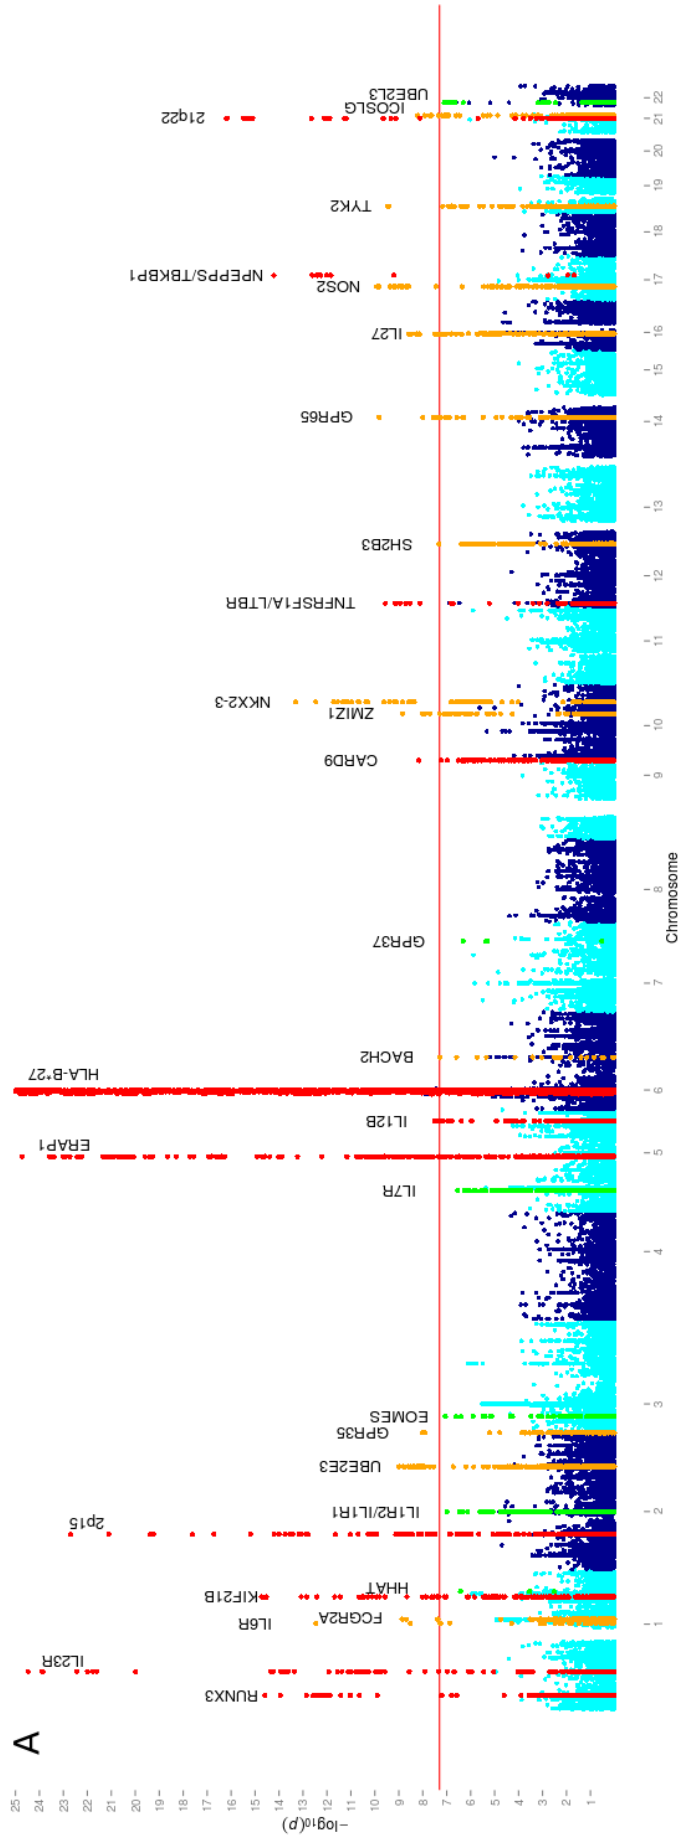

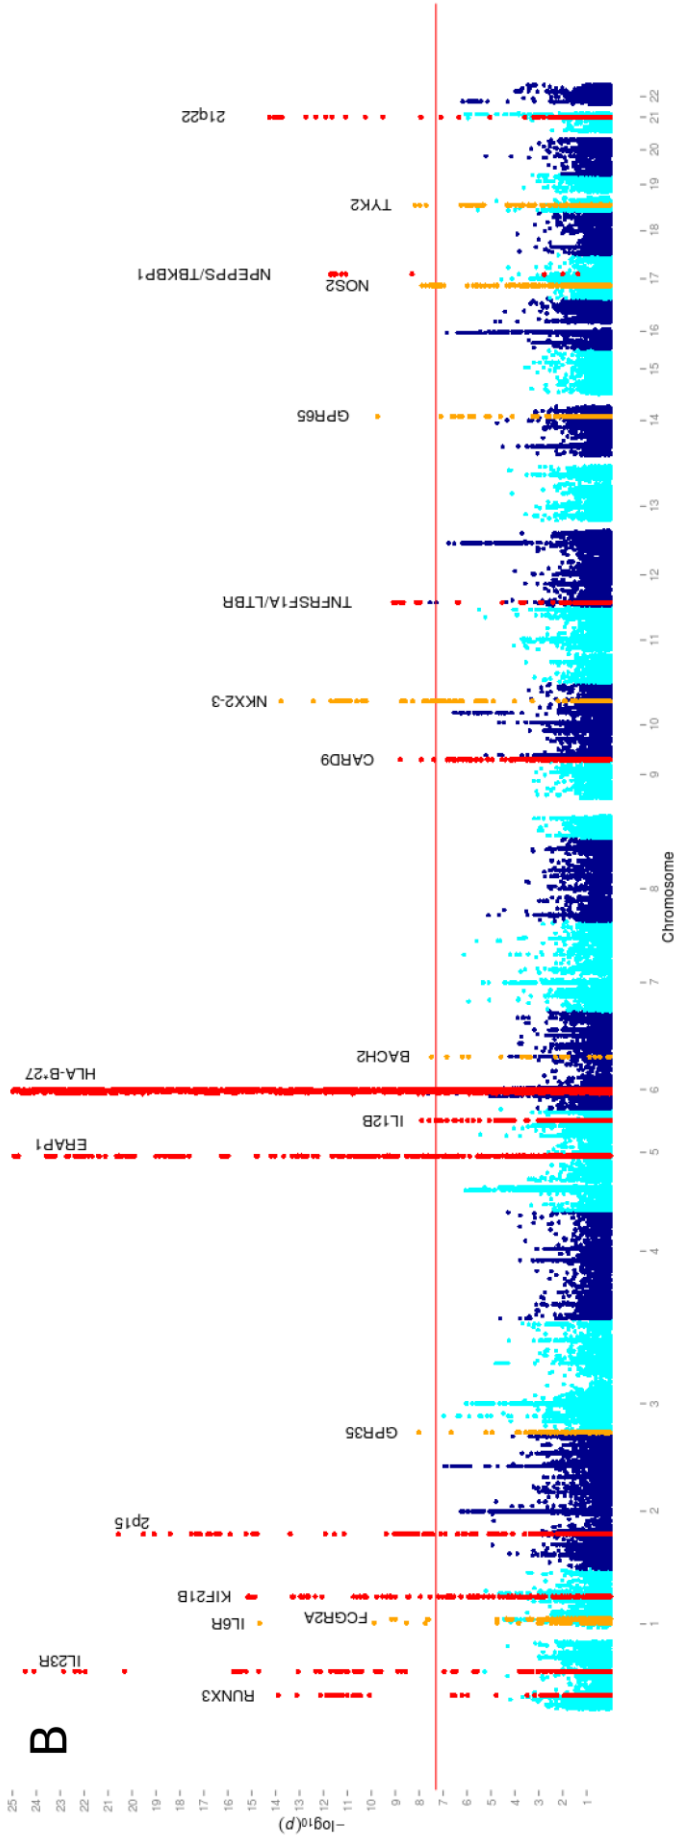

**B**

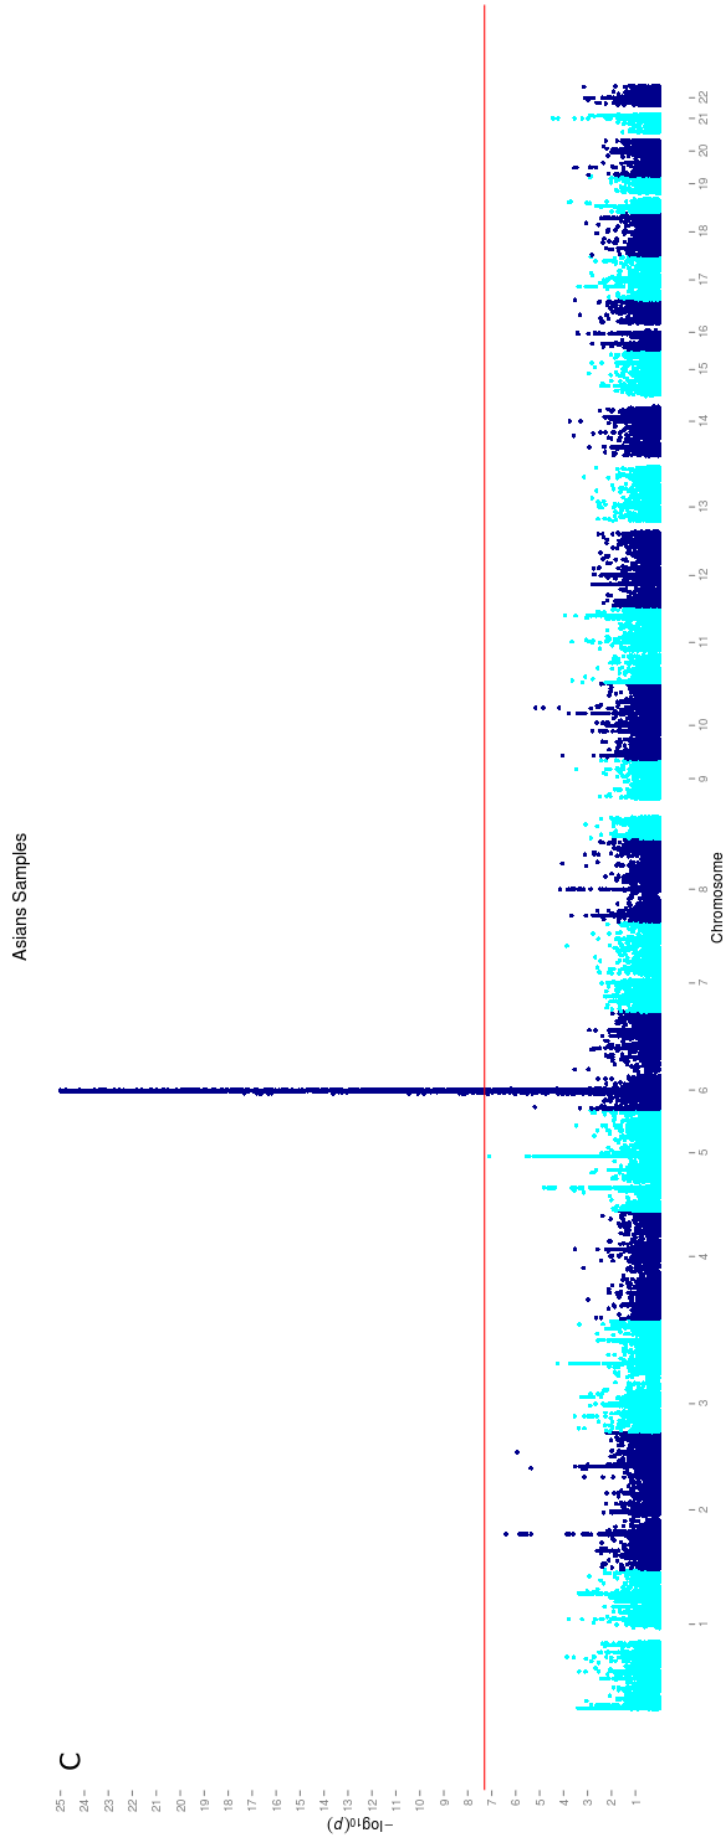

**Supplementary Figure 3** European cohort AS susceptibility associations in the 5q15 locus containing the three aminopeptidases *ERAP1*, *ERAP2* and *LNPEP*.  
 A) Unconditional association results tagged by the SNP rs30187. B) Associations over *ERAP2* and *LNPEP* after controlling for the SNP rs30187 association. C) Association results conditioning on rs30187 and rs2910686. Note the second signal over *ERAP1* remains significant (tagged by rs10045403) and no residual signal over *ERAP2/LNPEP* is seen.

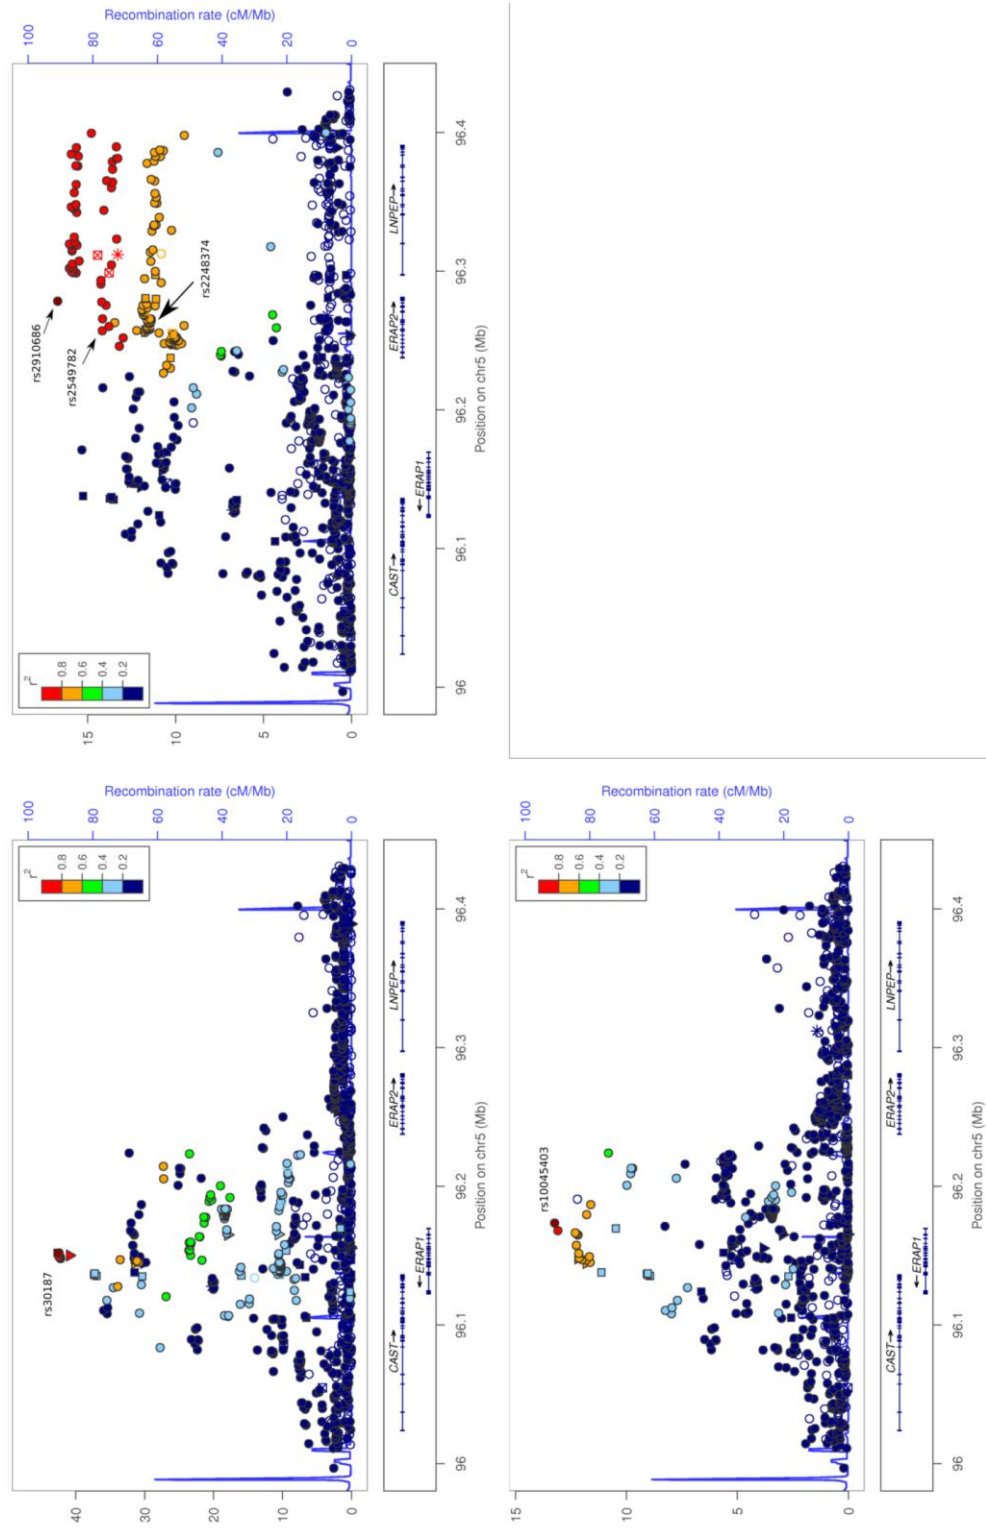

**Supplementary Figure 4** ImmunoChip-wide HLA-B\*27 interactions. Linkage disequilibrium ( $r$ ) between the HLA-B\*27 tagSNP rs116488202 and all SNPs assayed were computed in controls (A) and in cases (B). The blue and red vertical lines mark the LD observed between HLA-B\*27 and the two identified independently associated *ERAP1* SNPs rs30187 and rs10045403. Epistasis between HLA-B\*27 and all other non-MHC SNPs was assessed via logistic regression where we included an interaction term between the SNP tested and the tag SNP rs116488202, and population stratification was modeled with the first five principal components as covariates. Q-Q plots for the interaction term for all SNPs tested excluding the MHC (C) and for all SNPs tested excluding the MHC and those in the *ERAP1* locus (D).

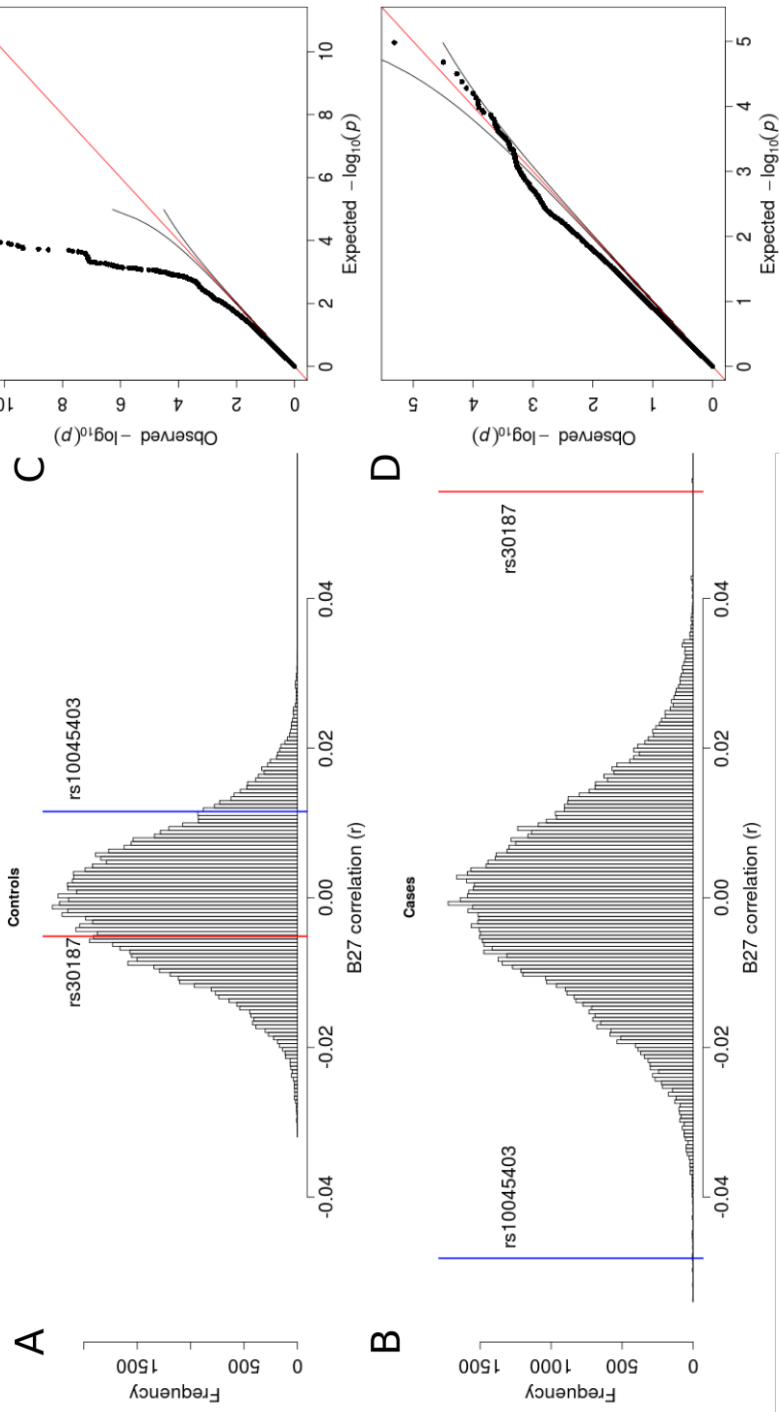

**Supplementary Figure 5** Locus association plots and linkage disequilibrium patterns with lead SNP in each of the three analyses performed: European cohort (upper left), Asian cohort (upper right) and European plus Asian cohort (lower left).

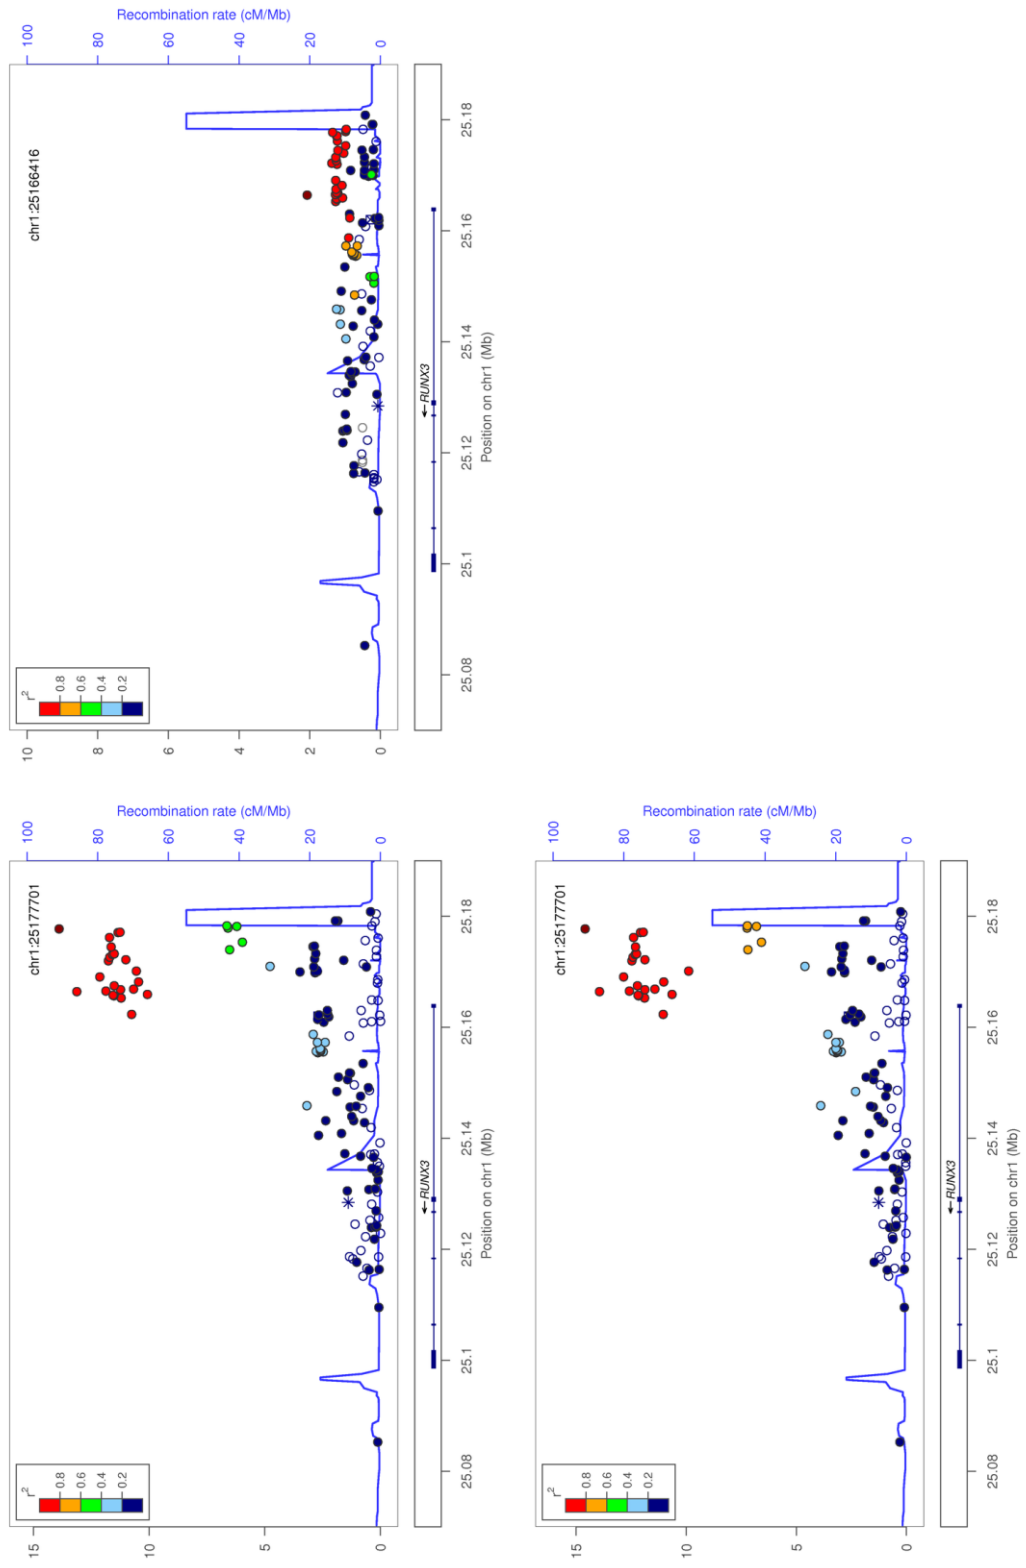



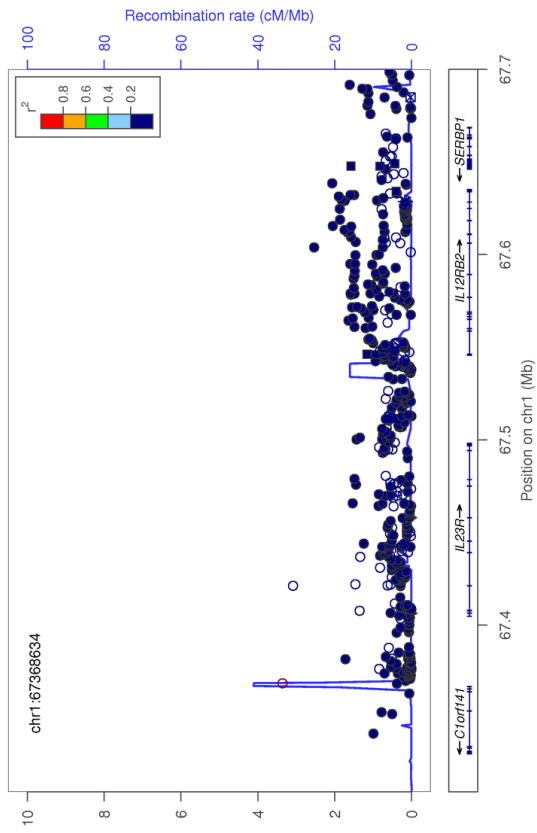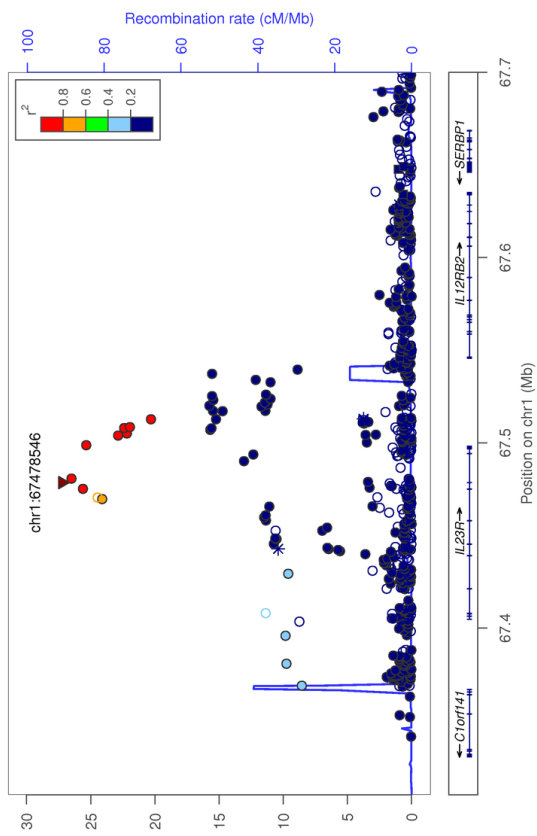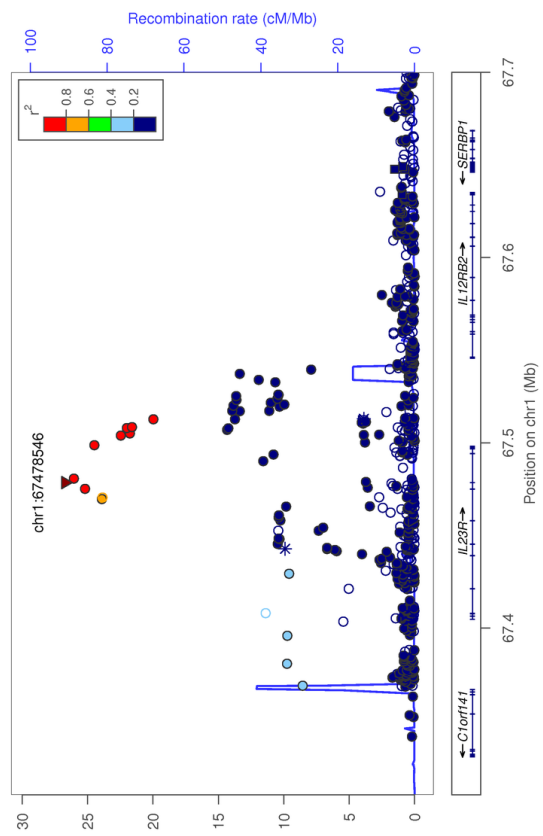

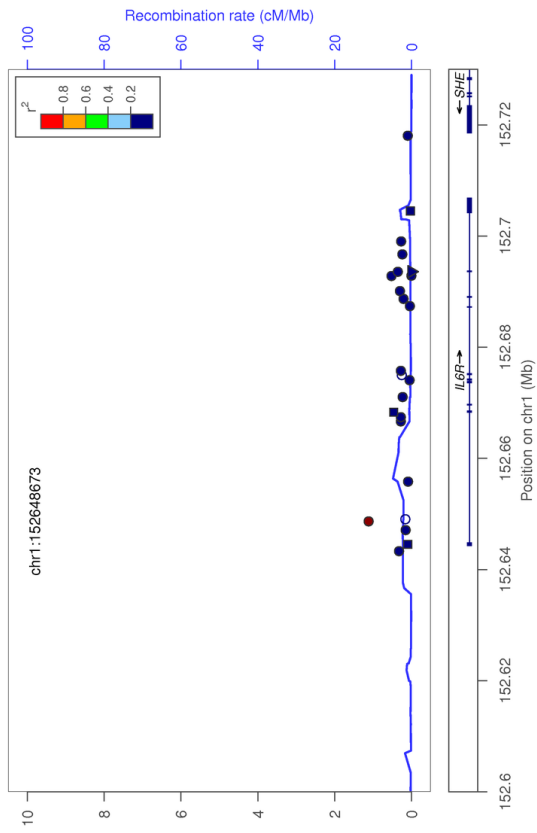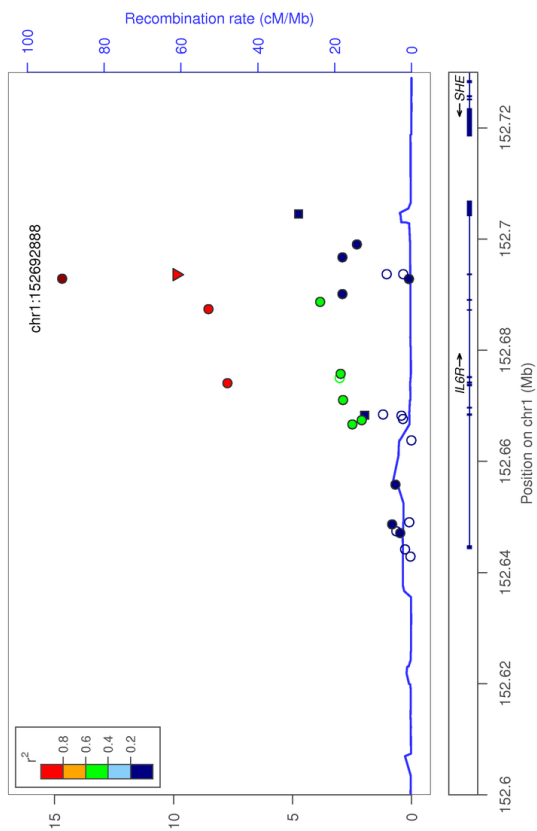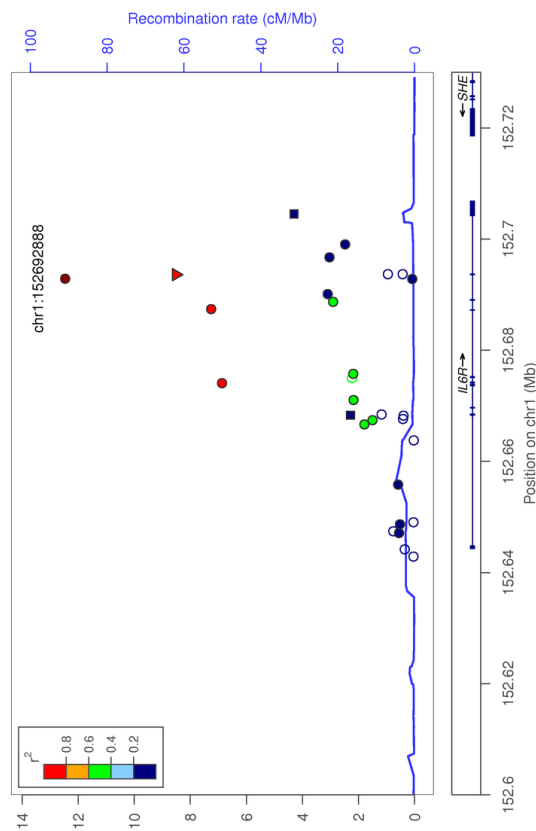

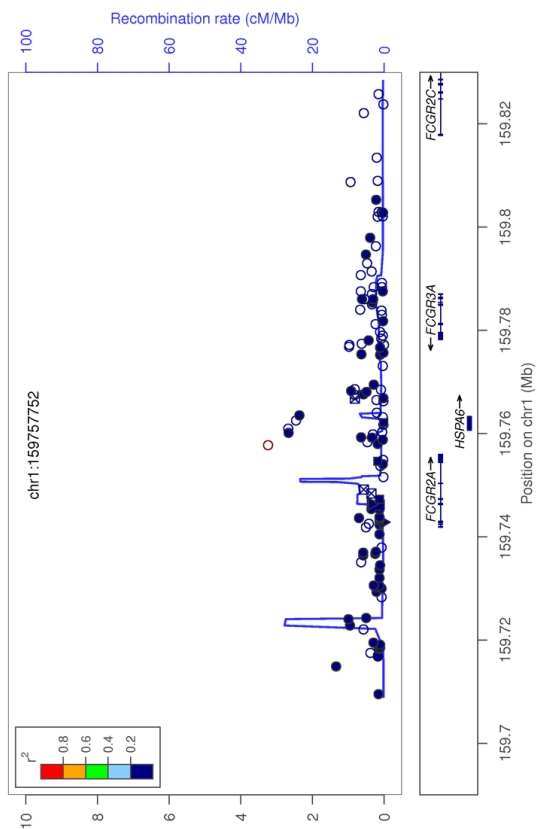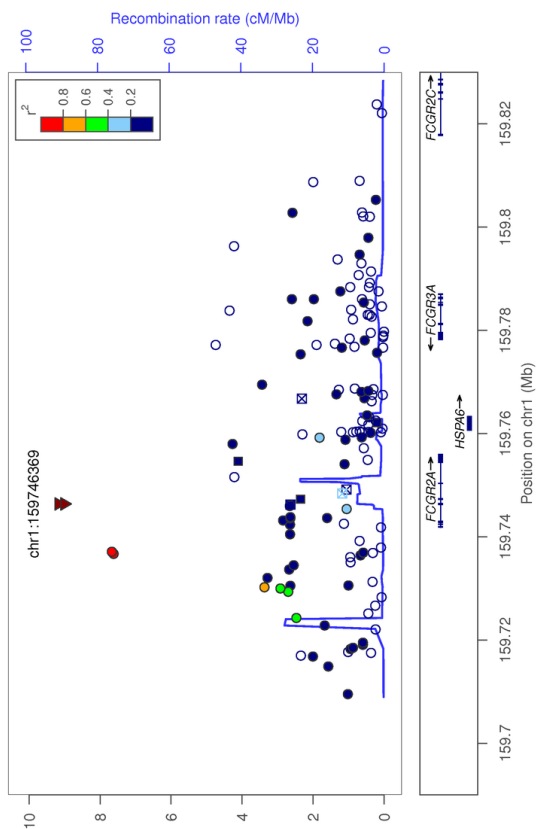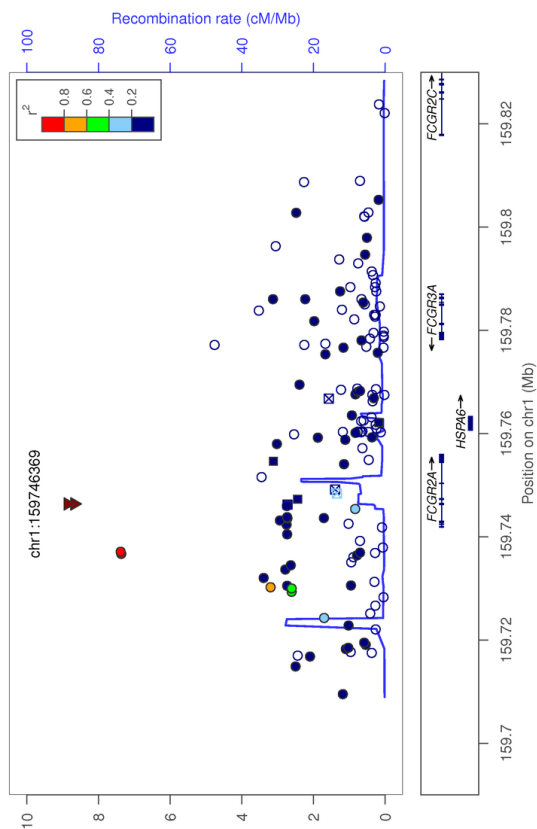

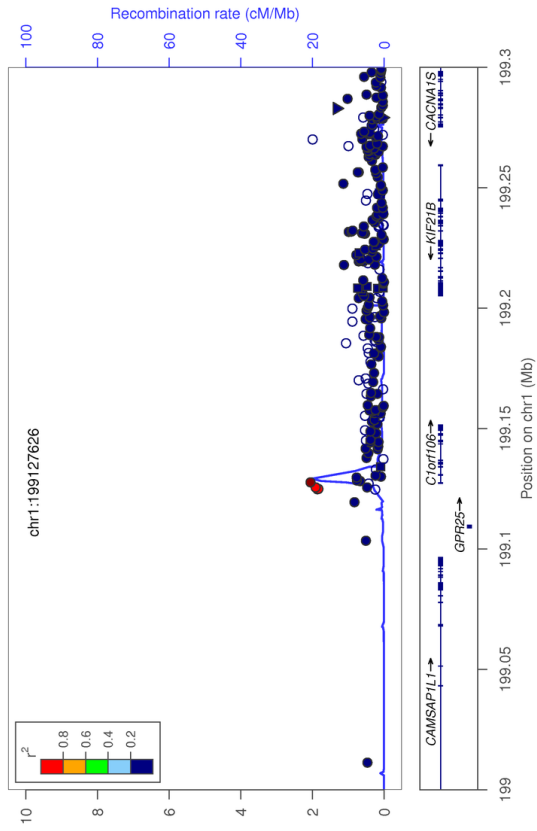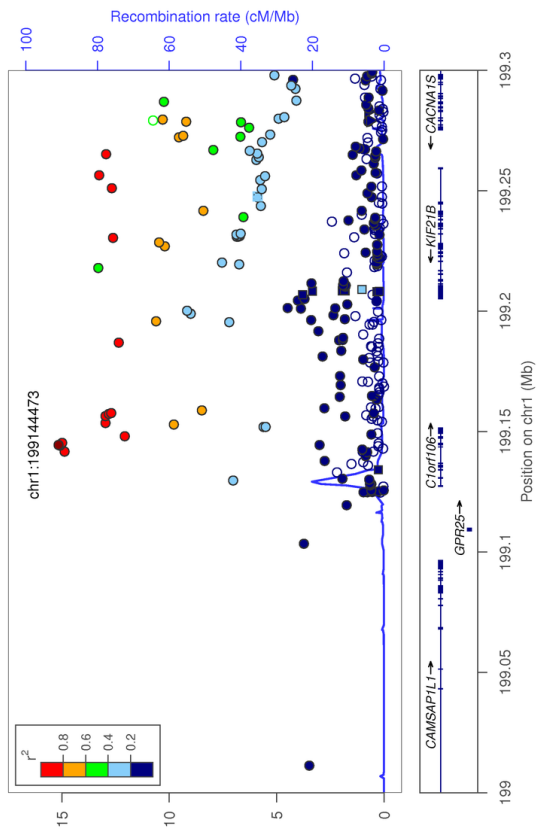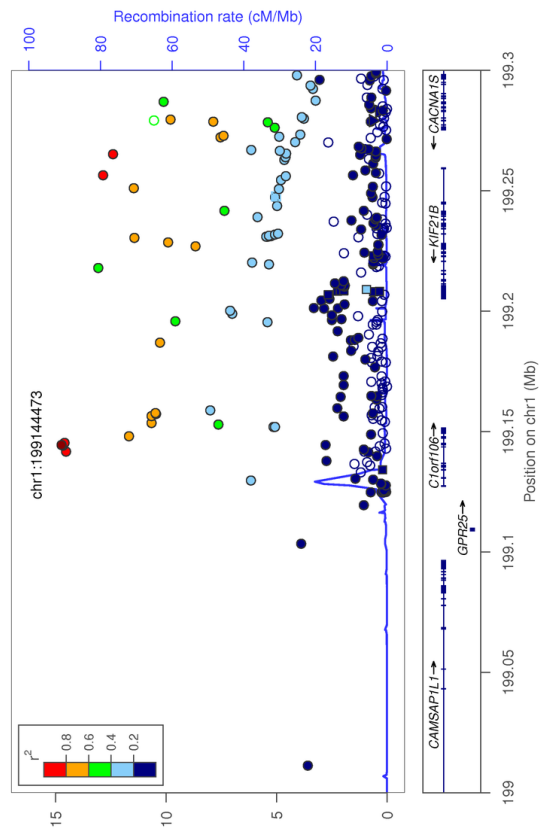

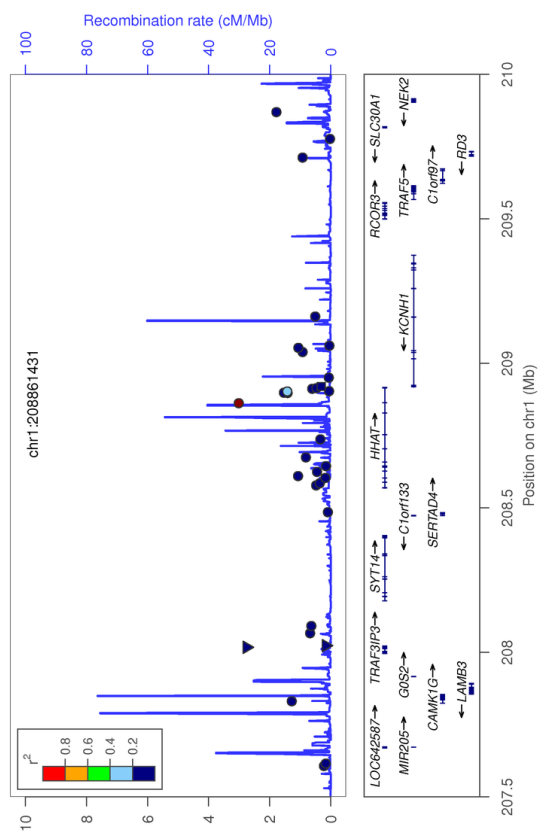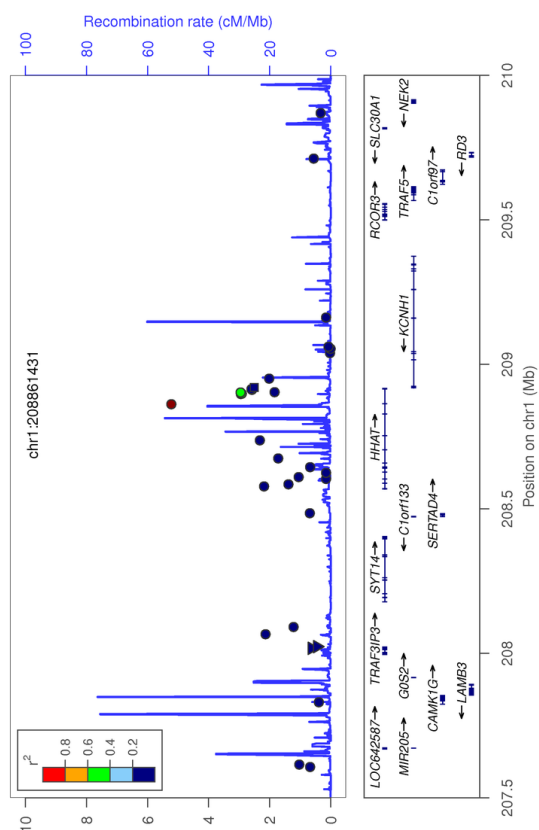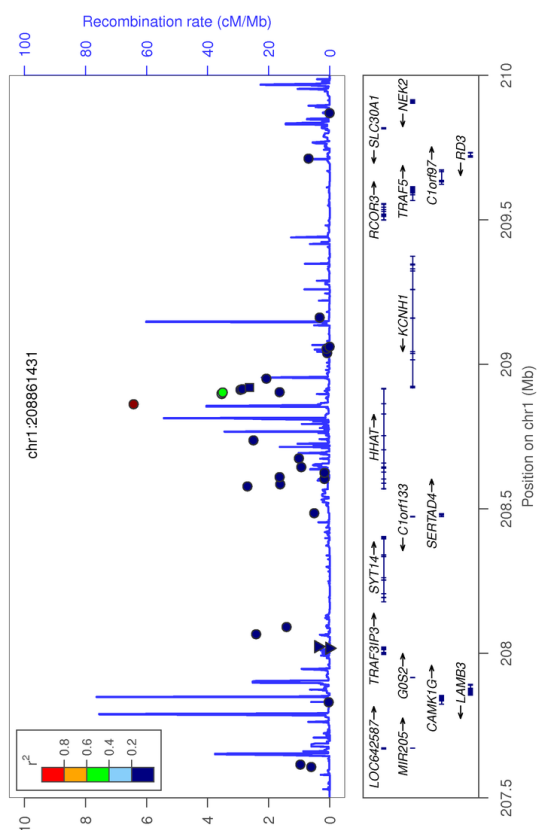

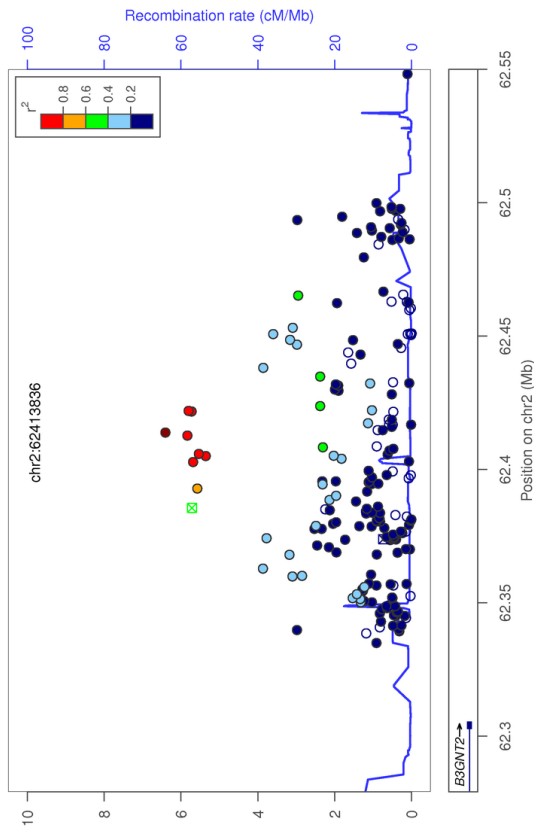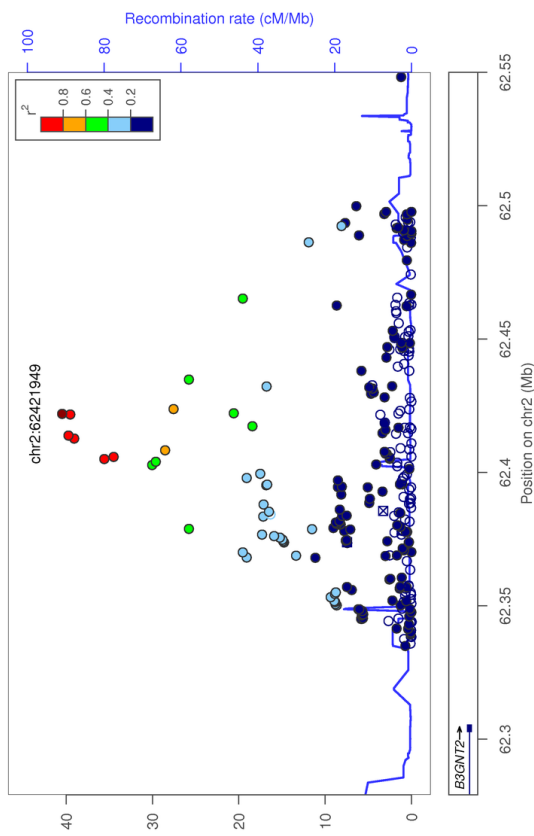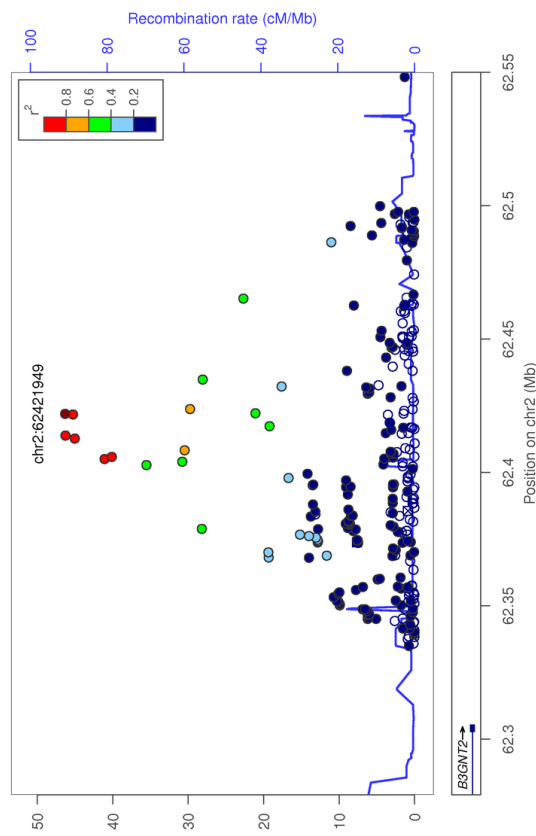

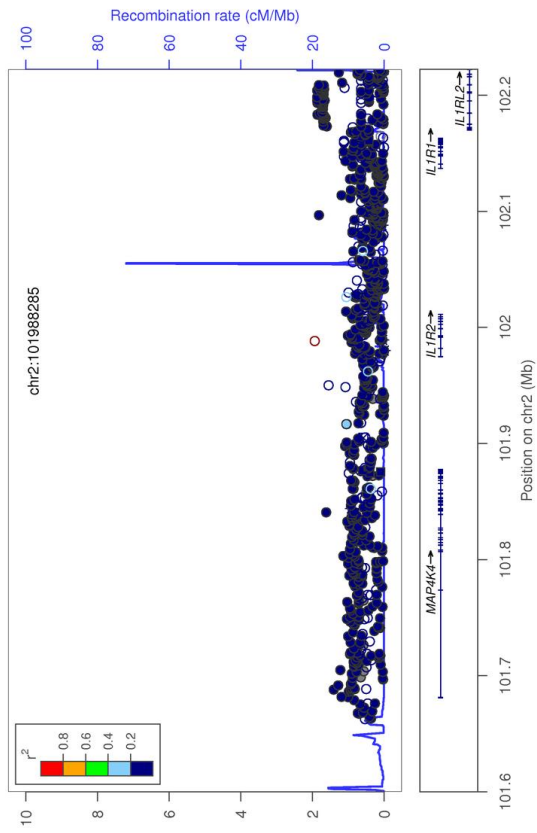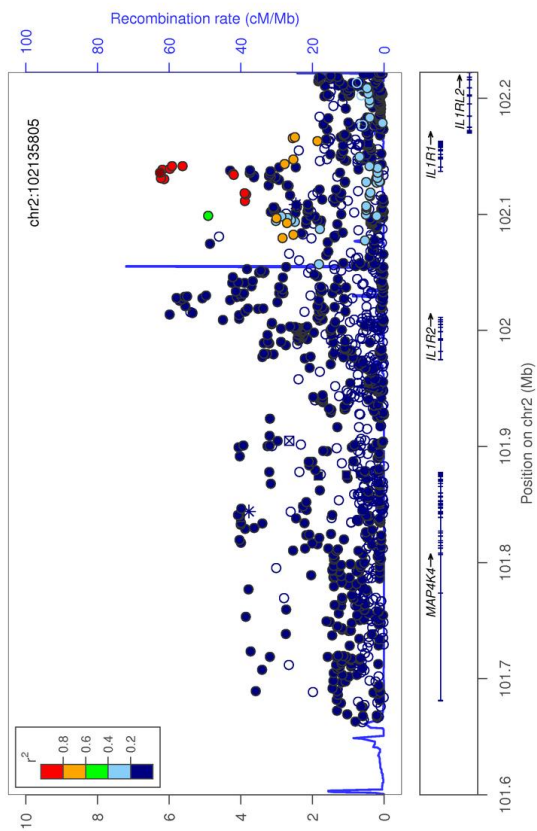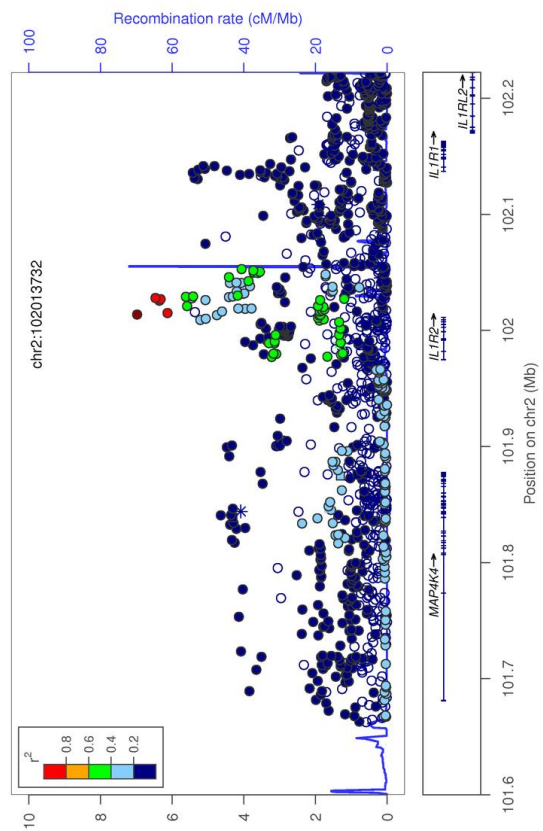

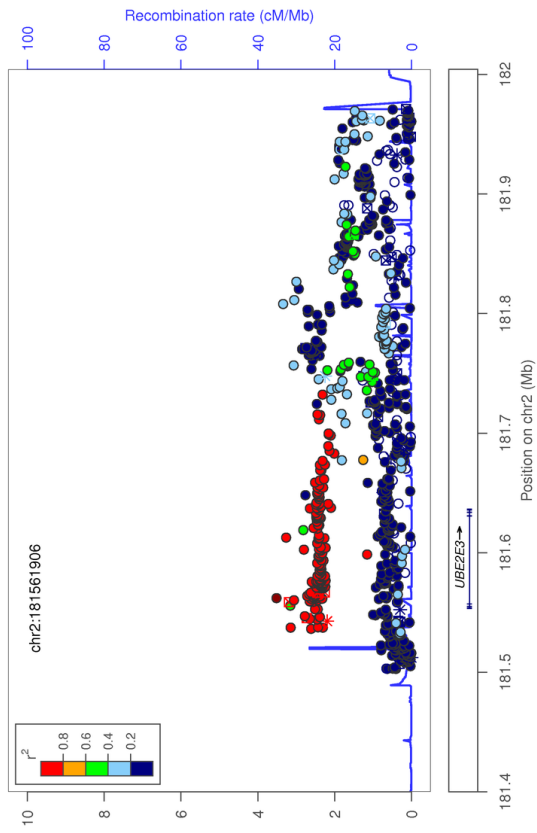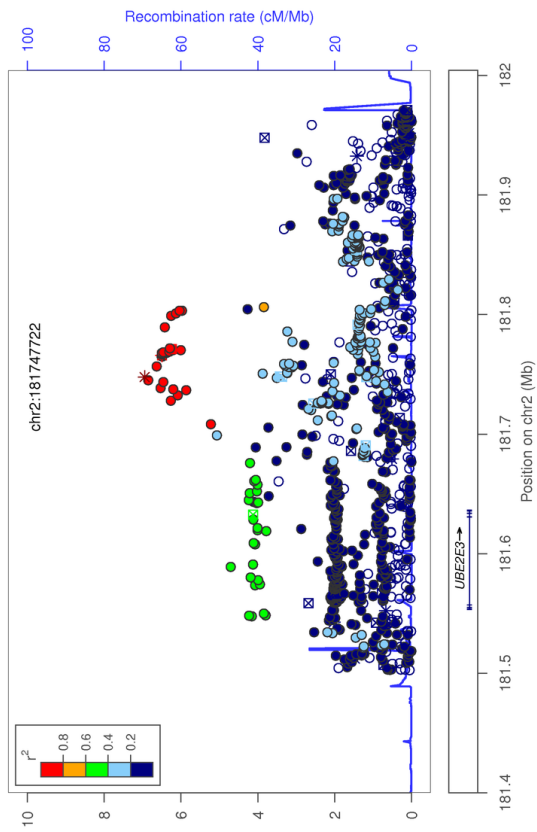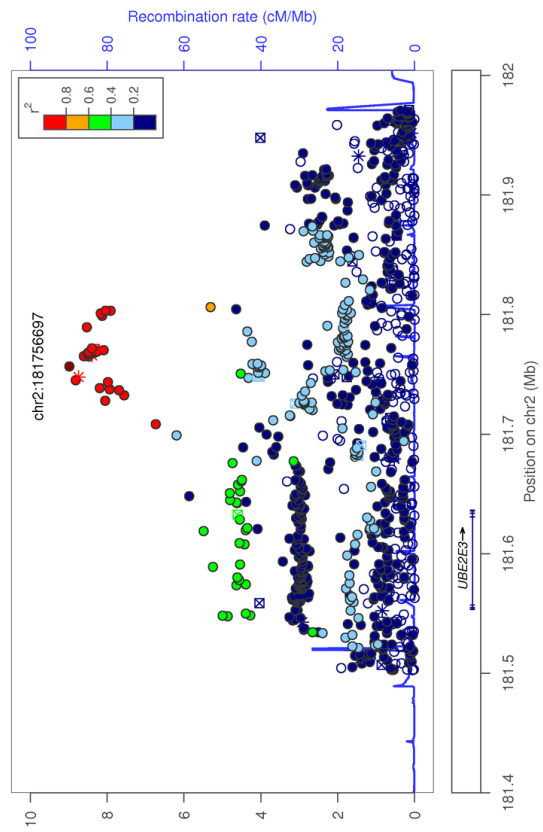



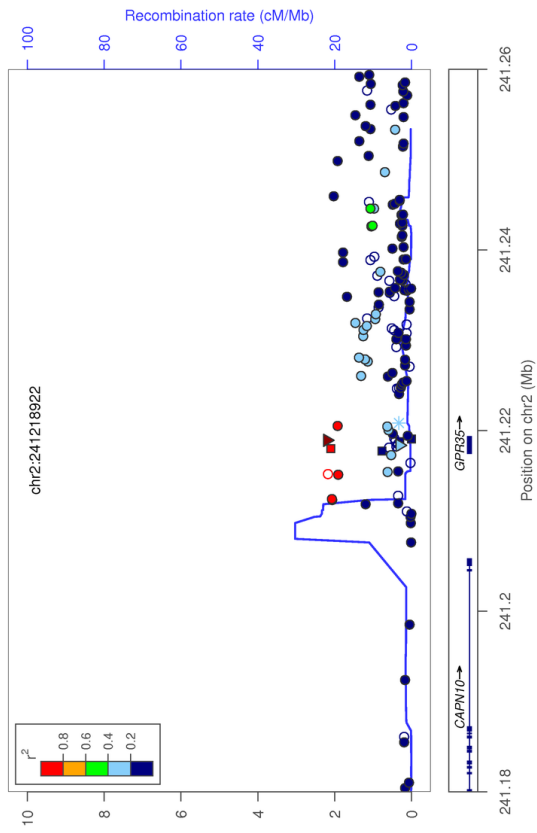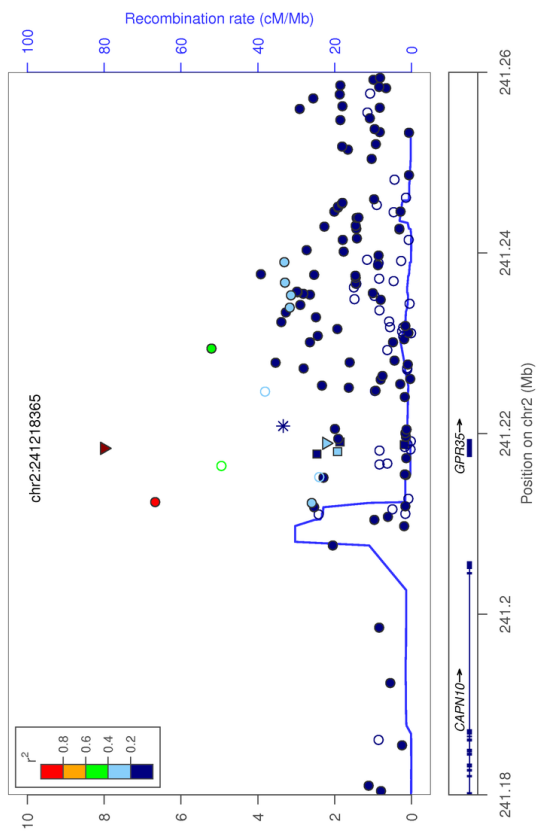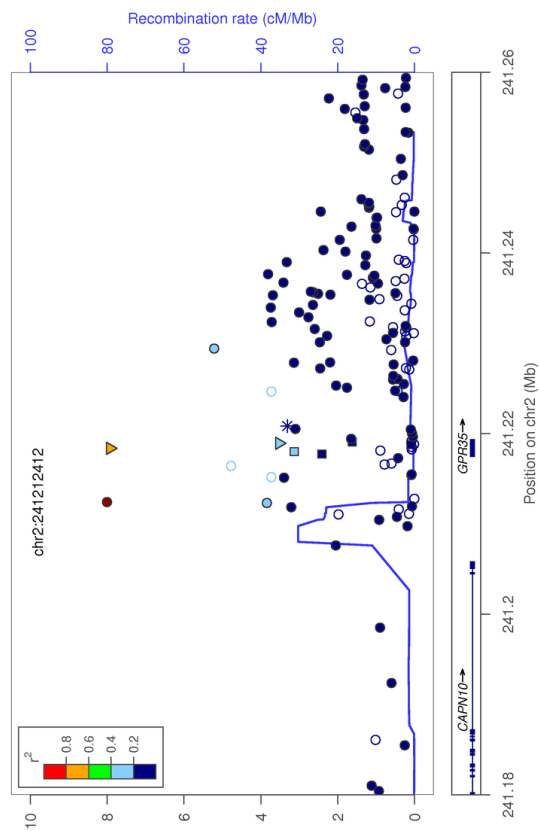

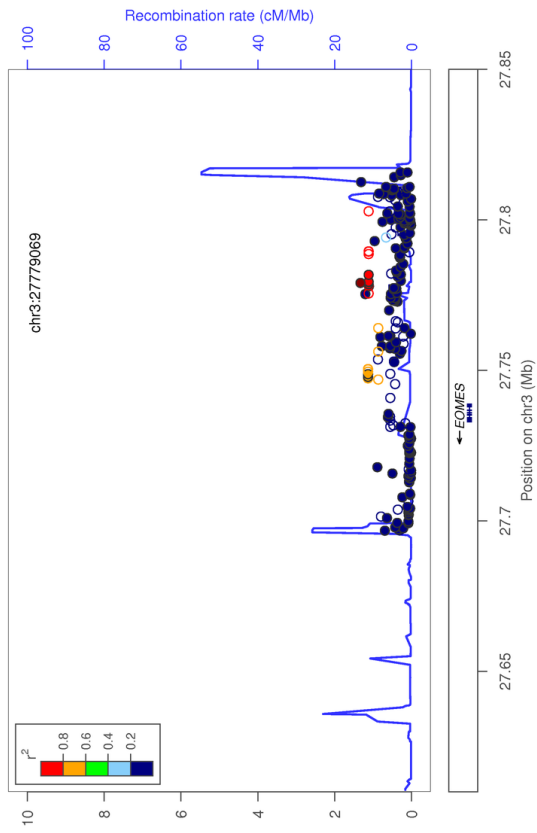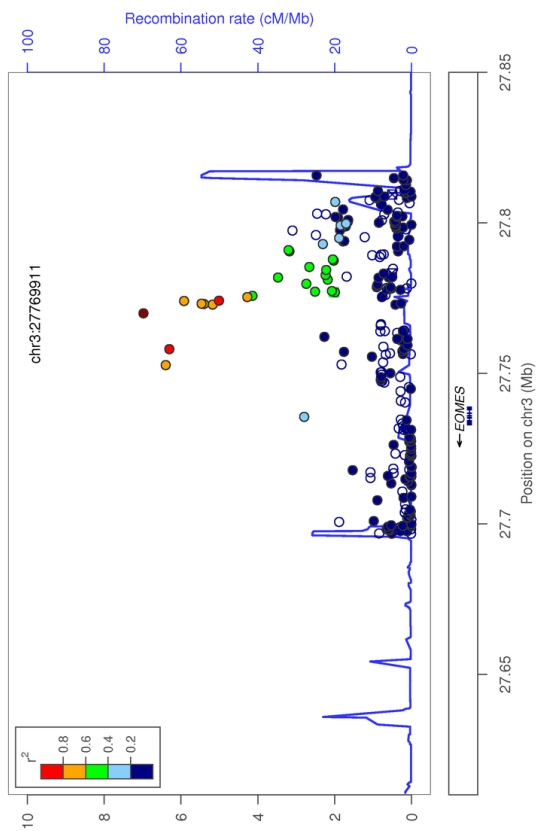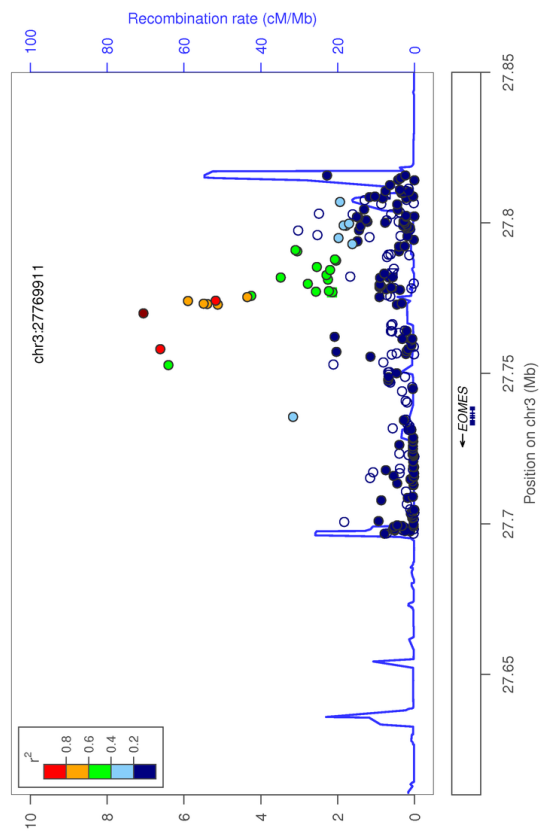

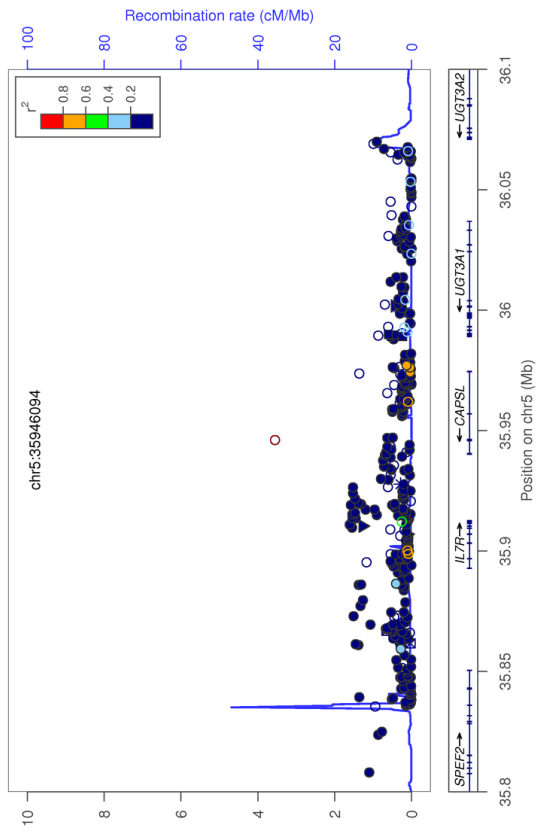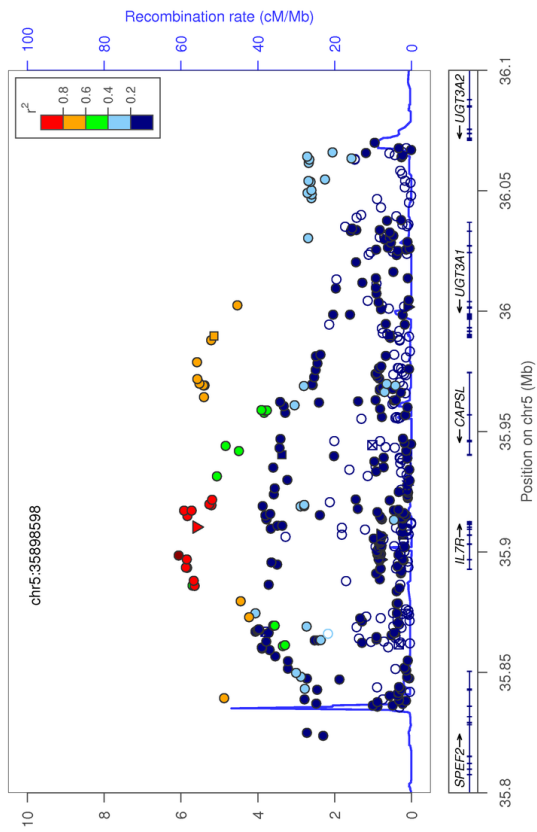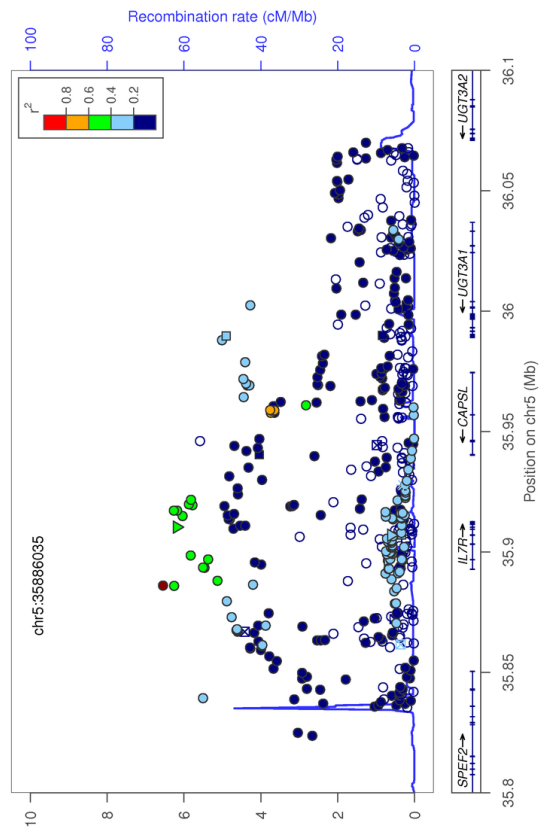

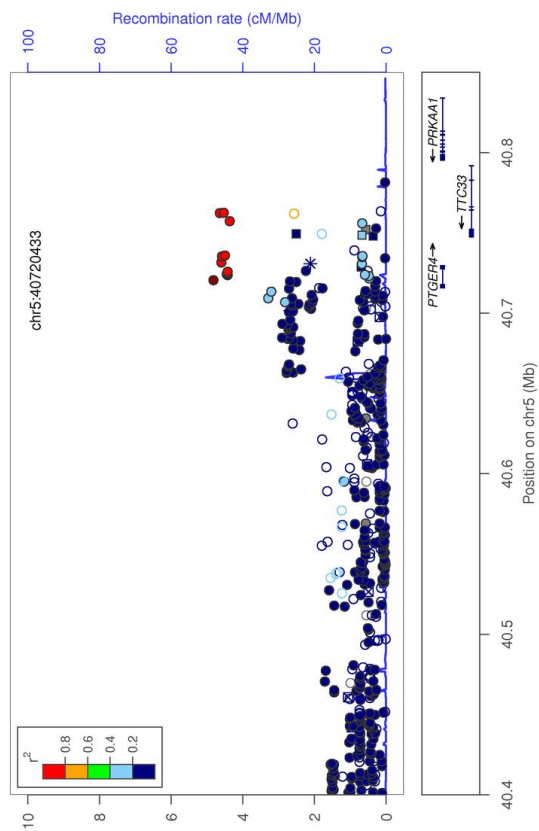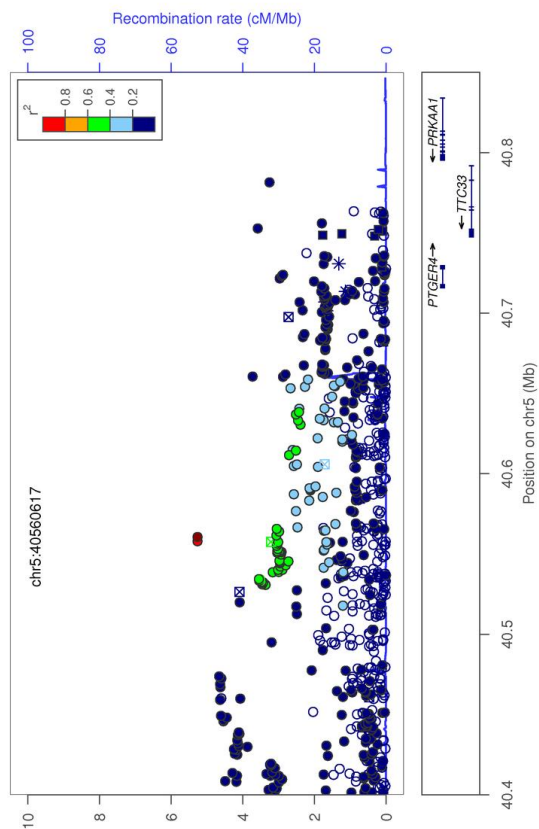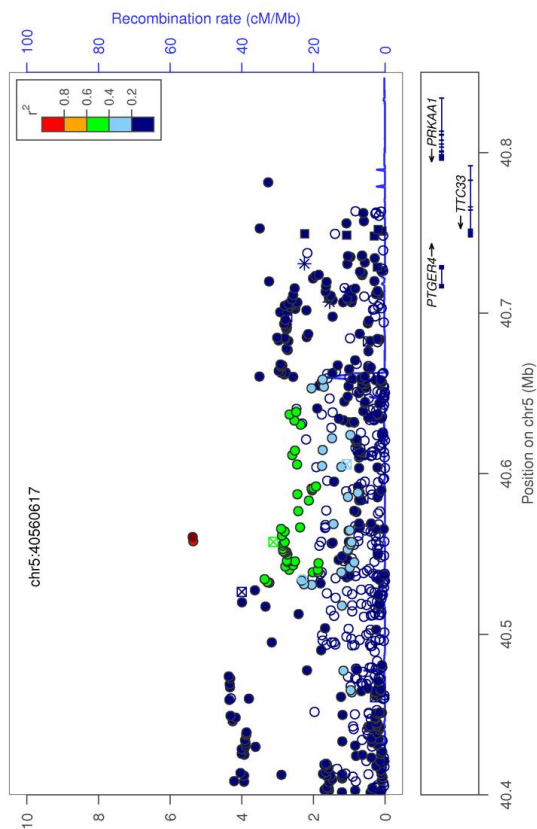

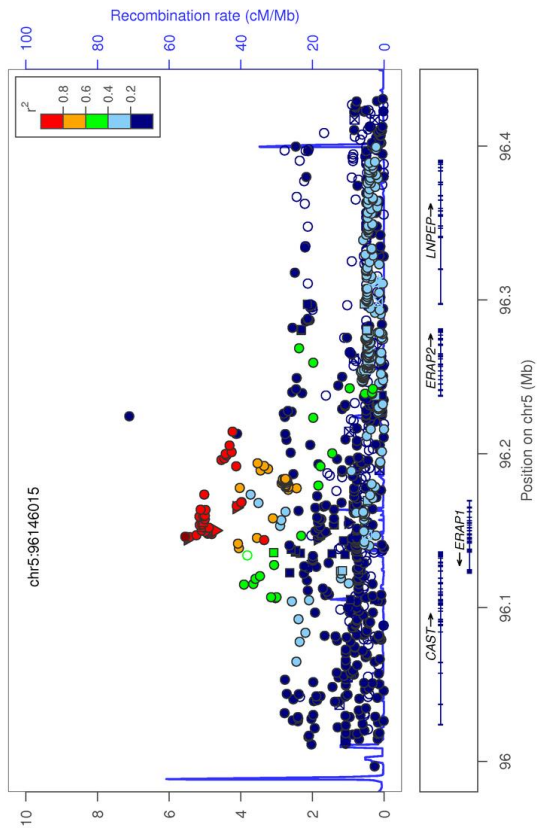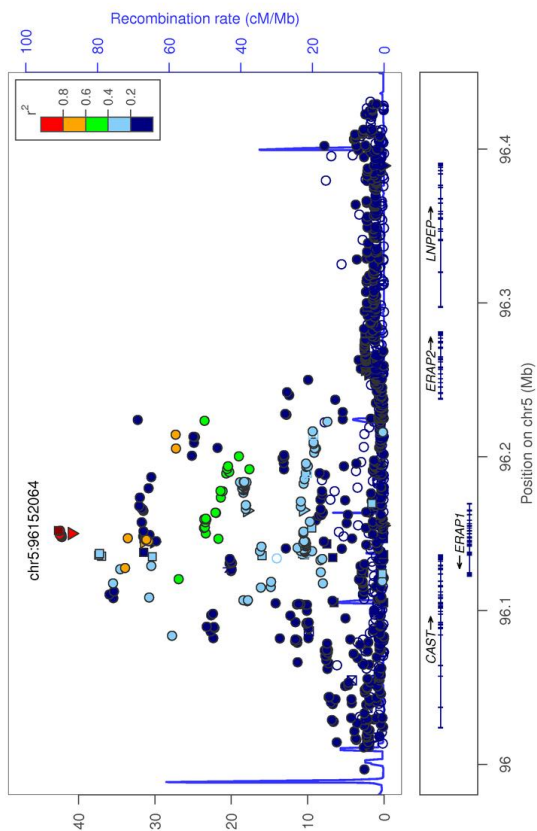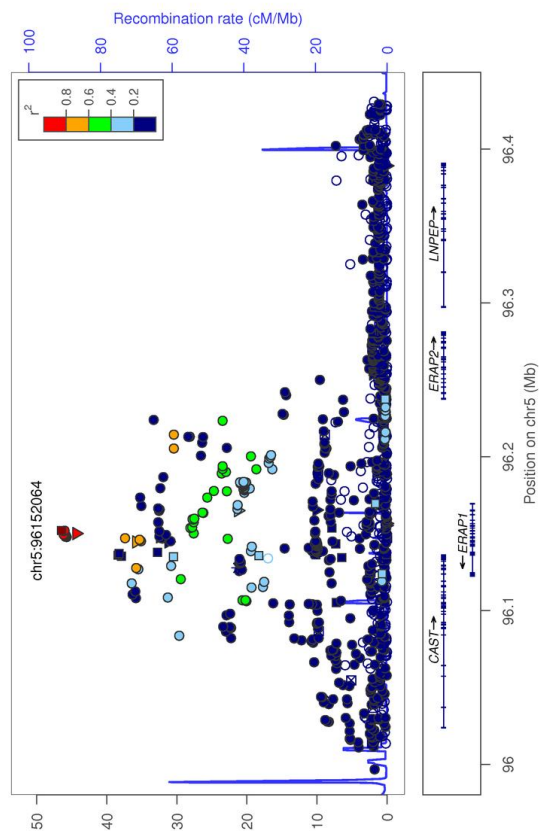

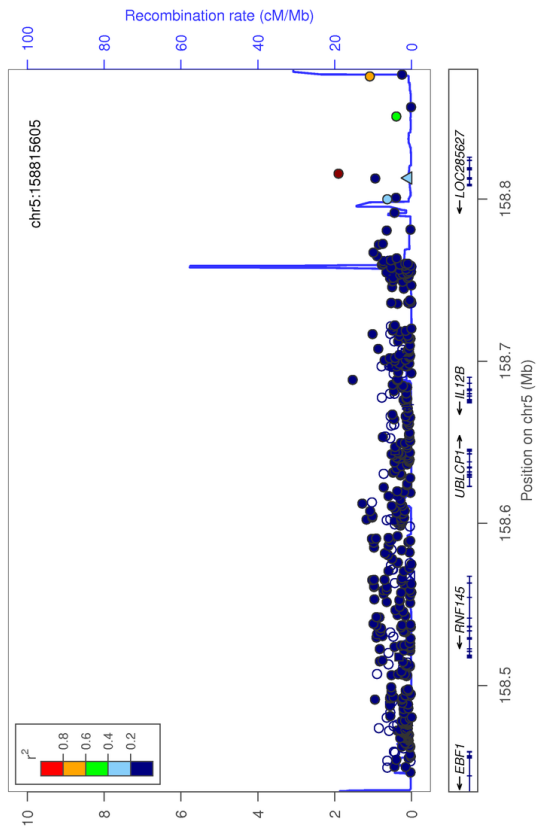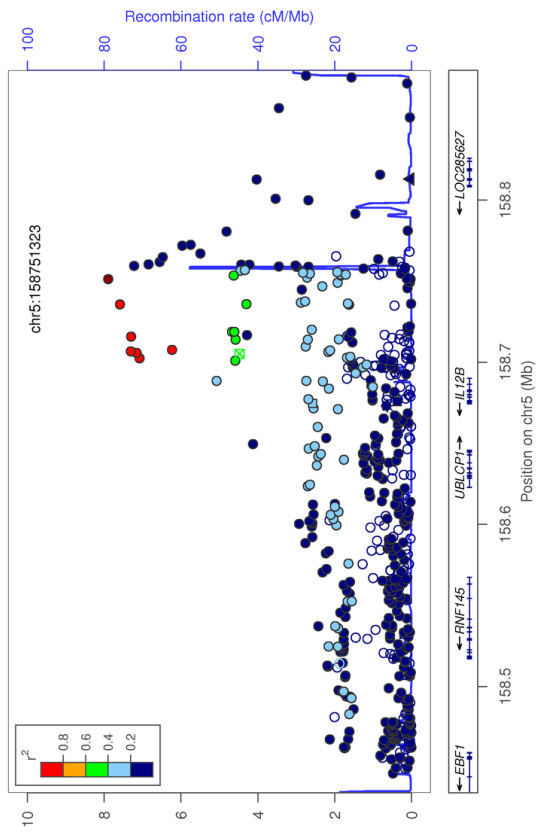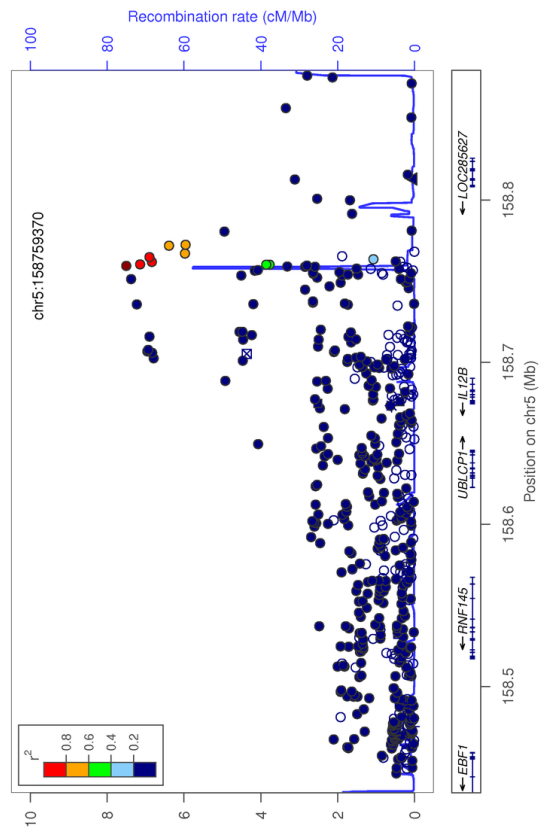

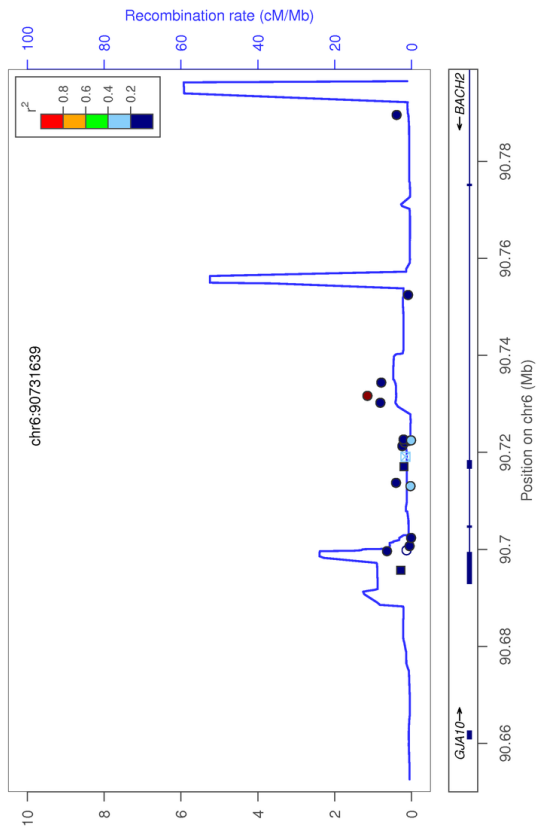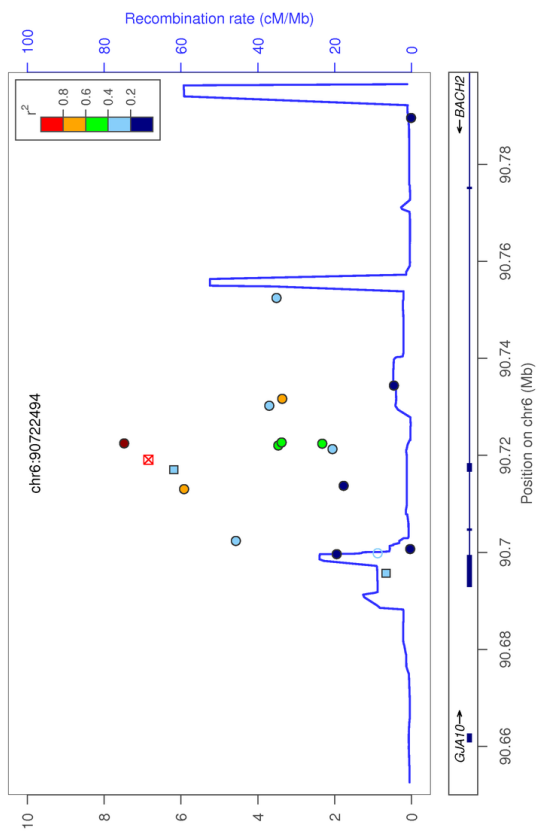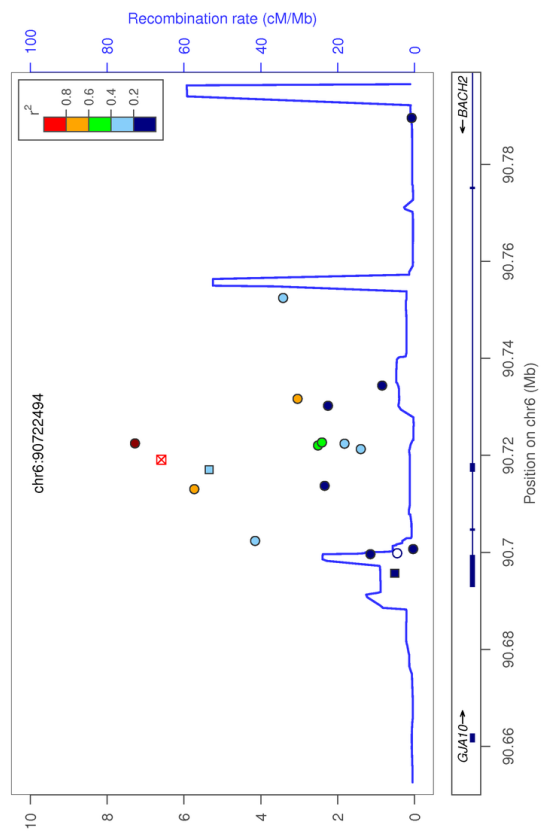

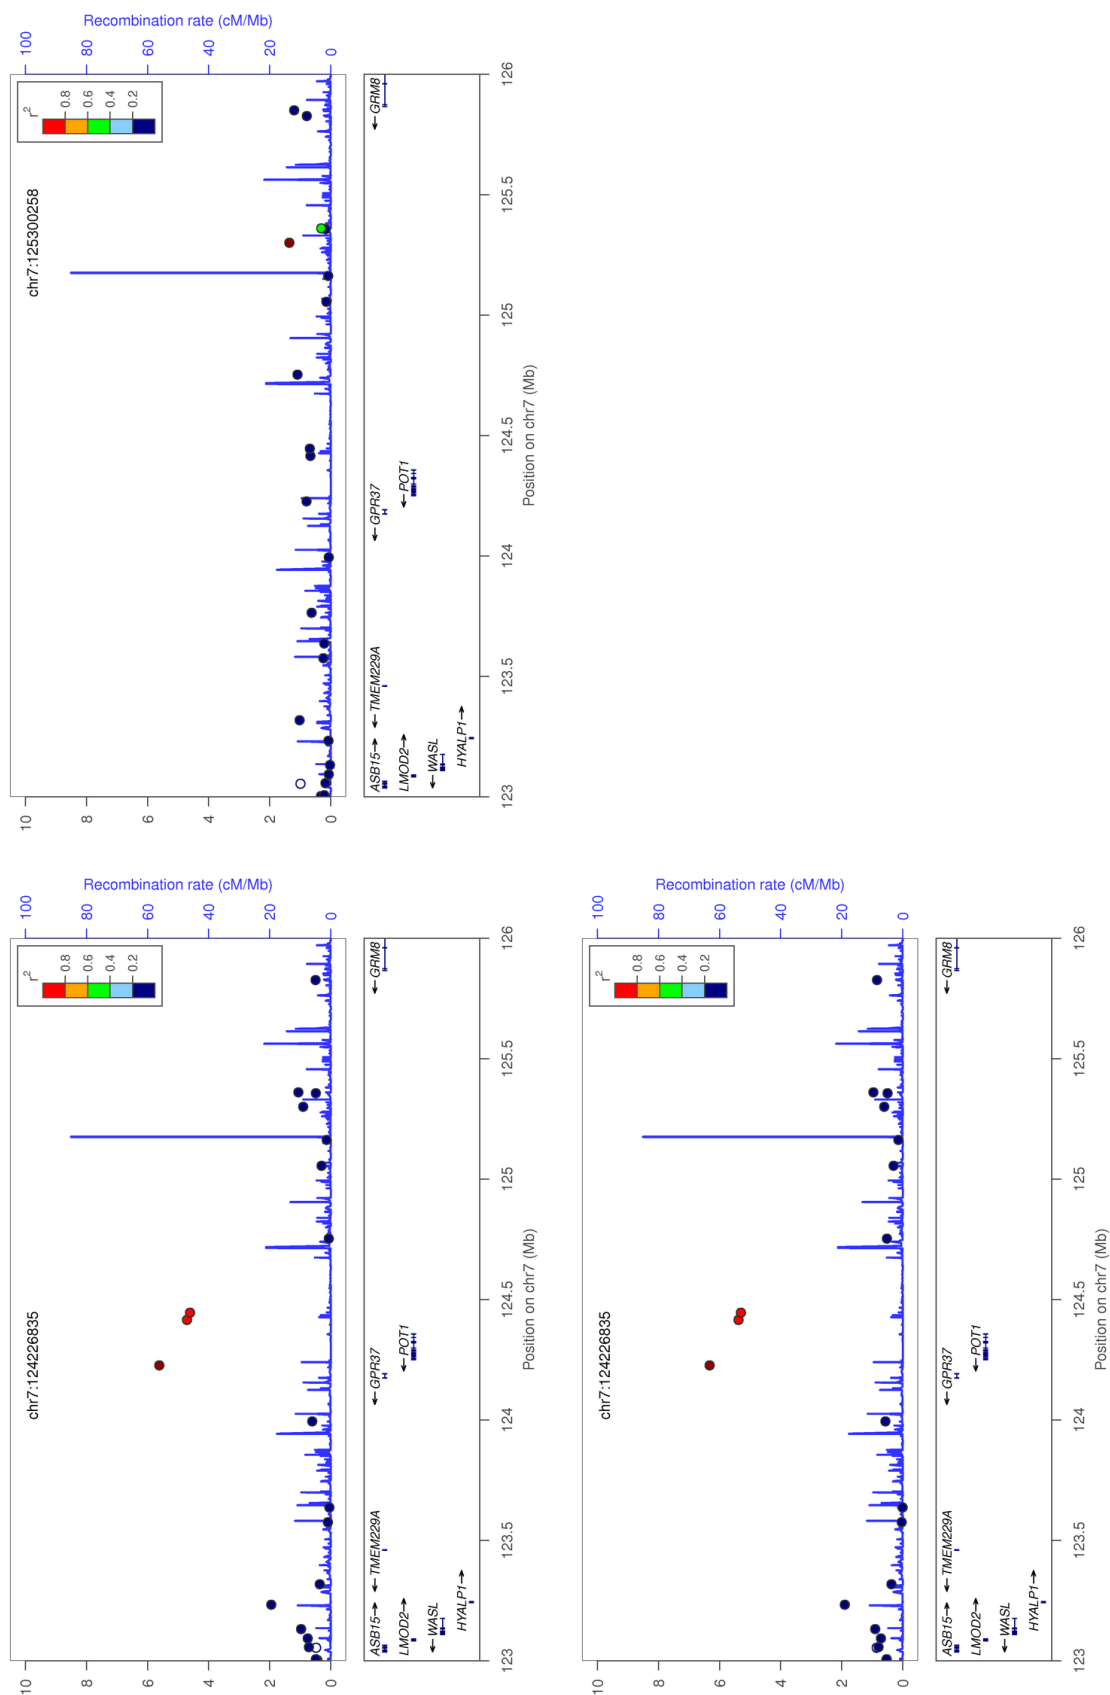



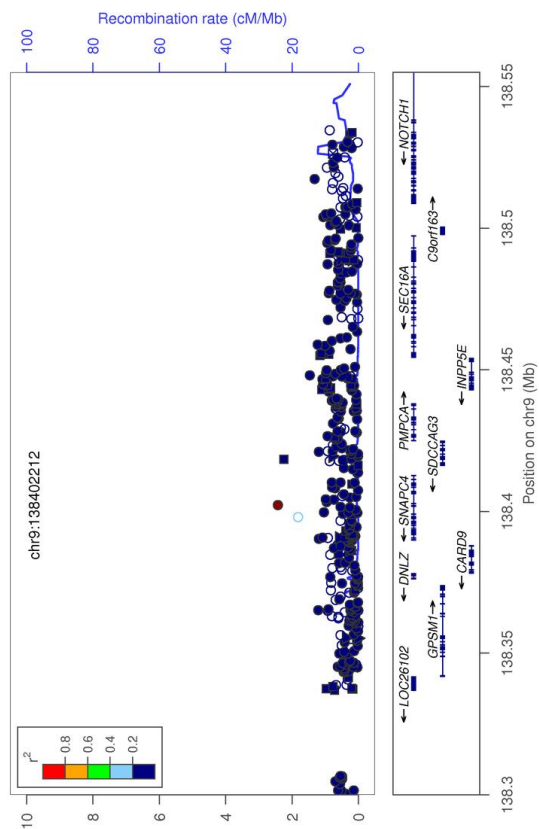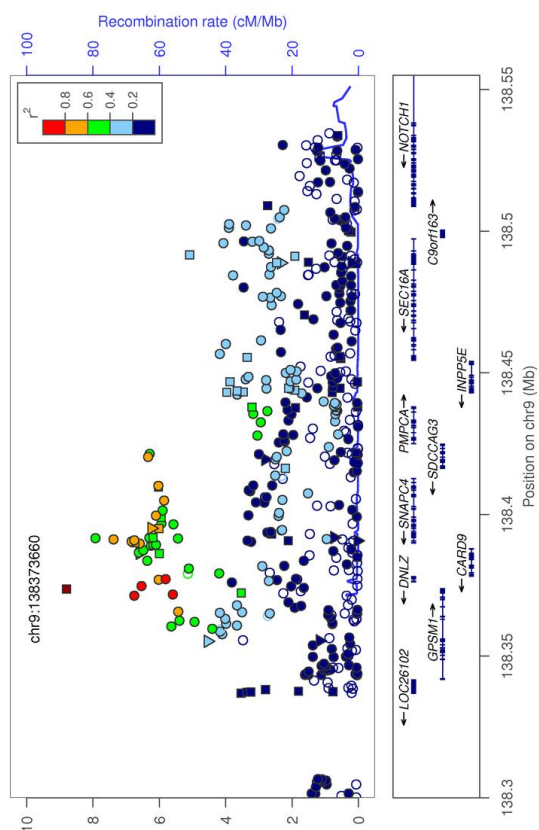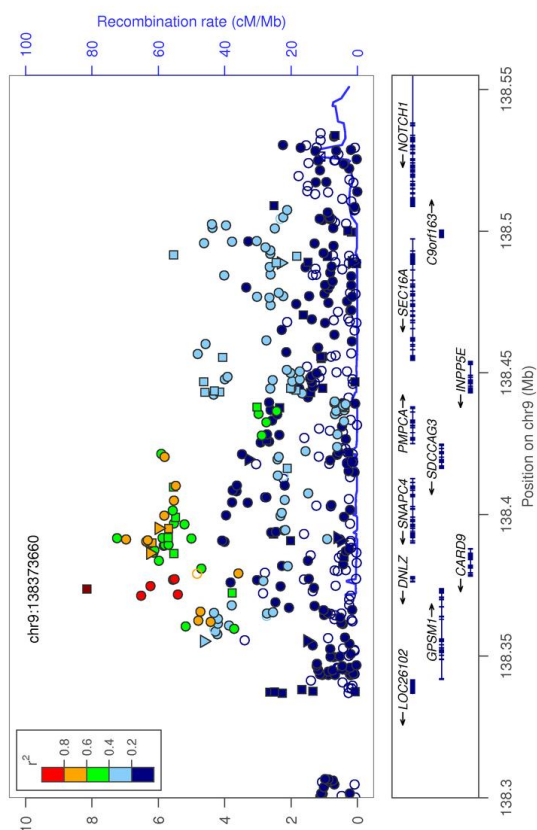

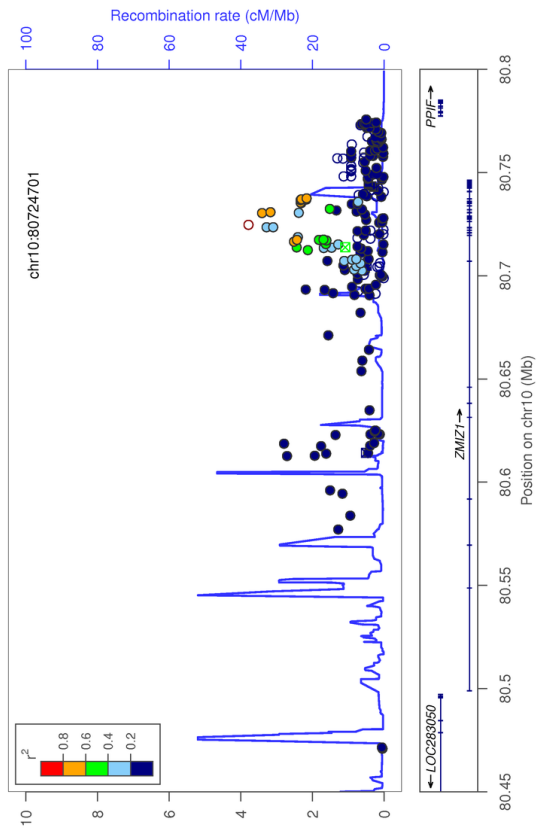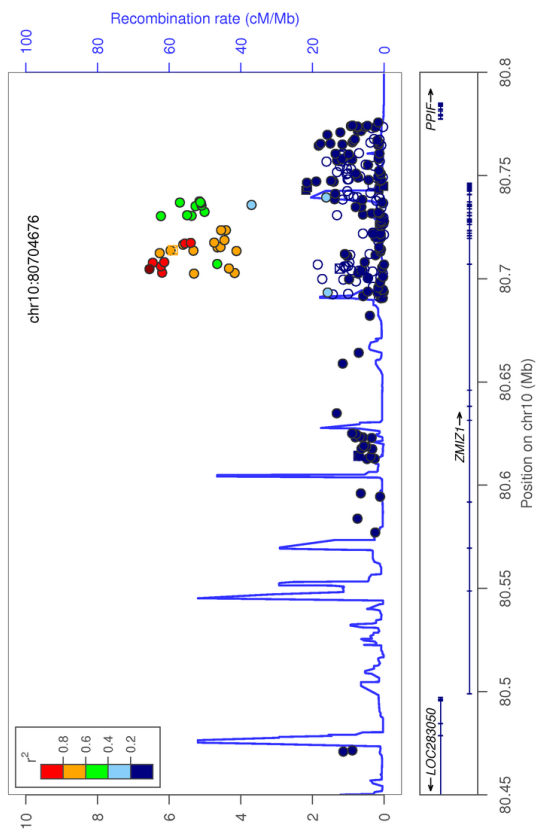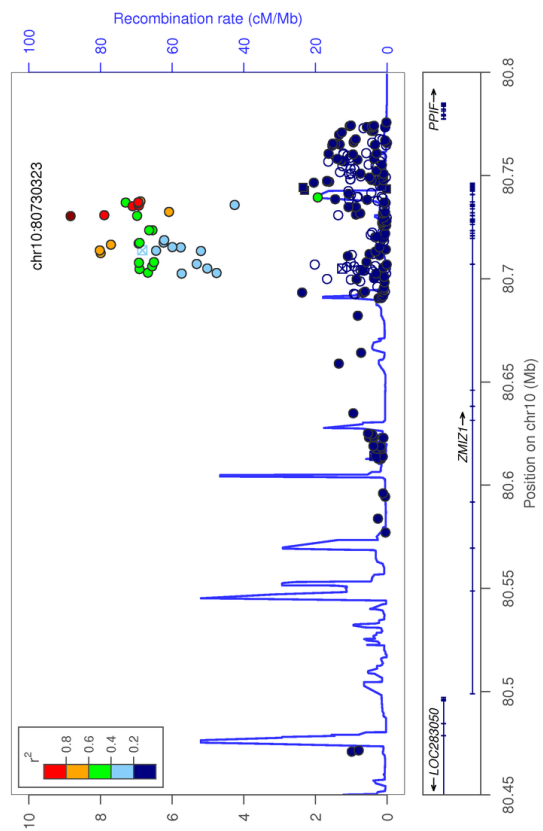

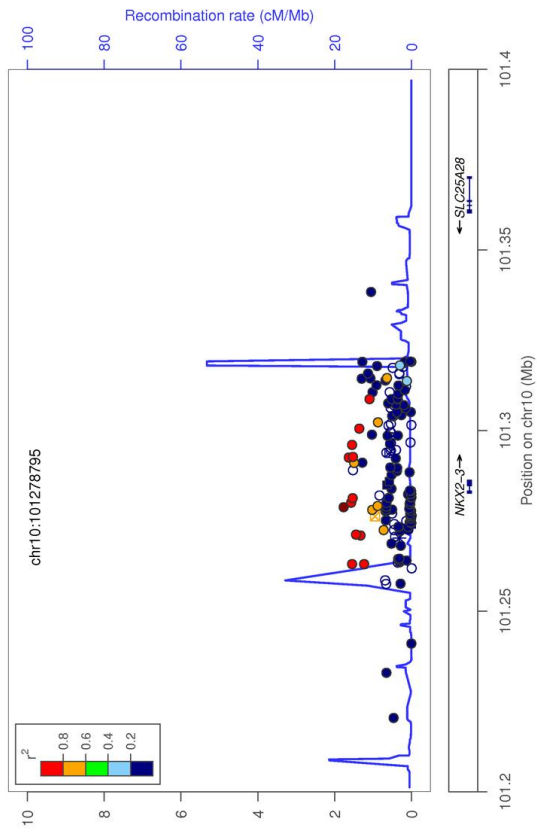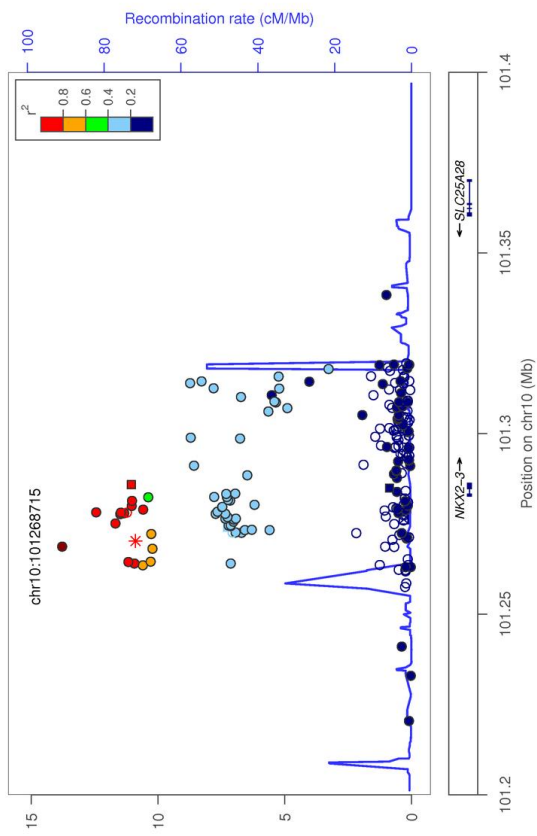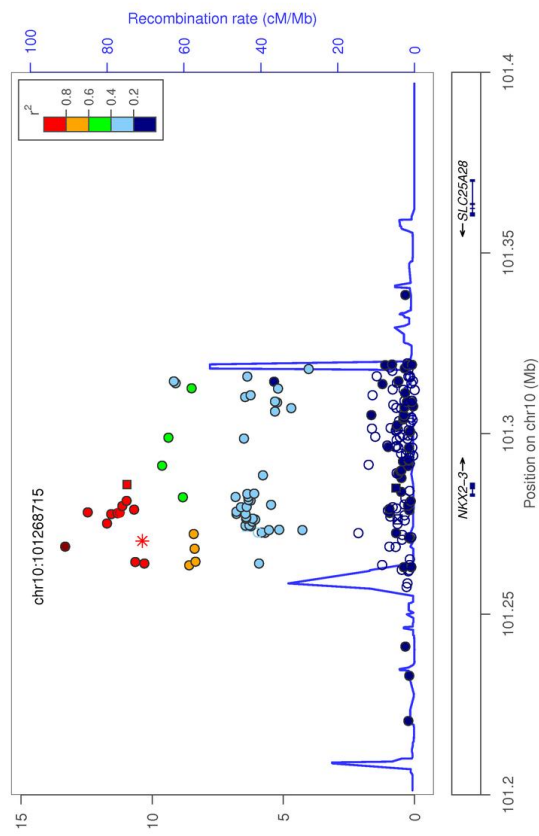

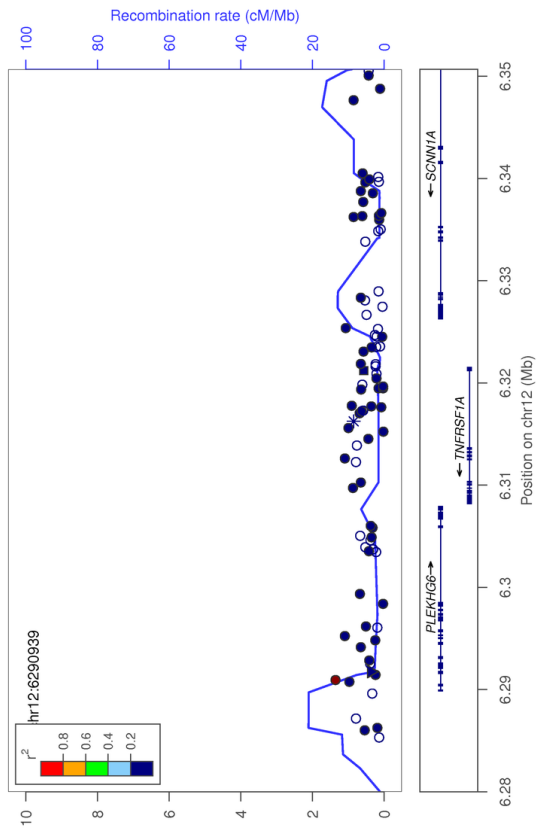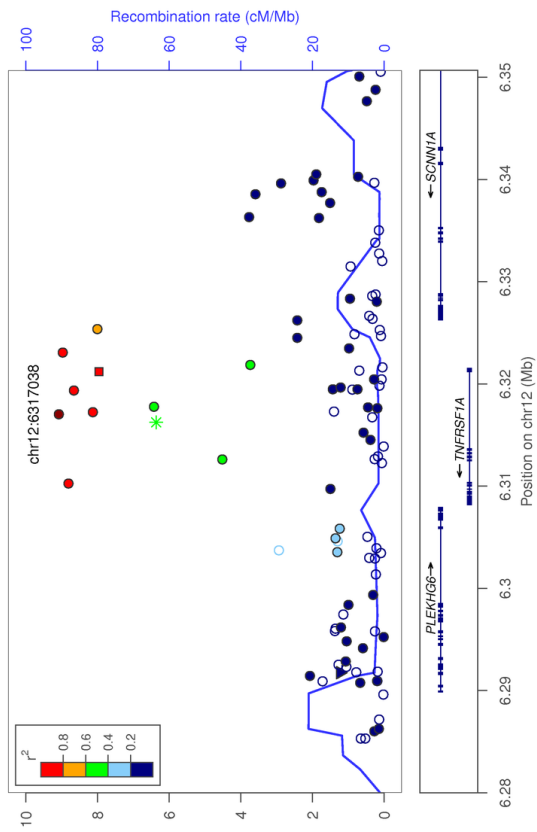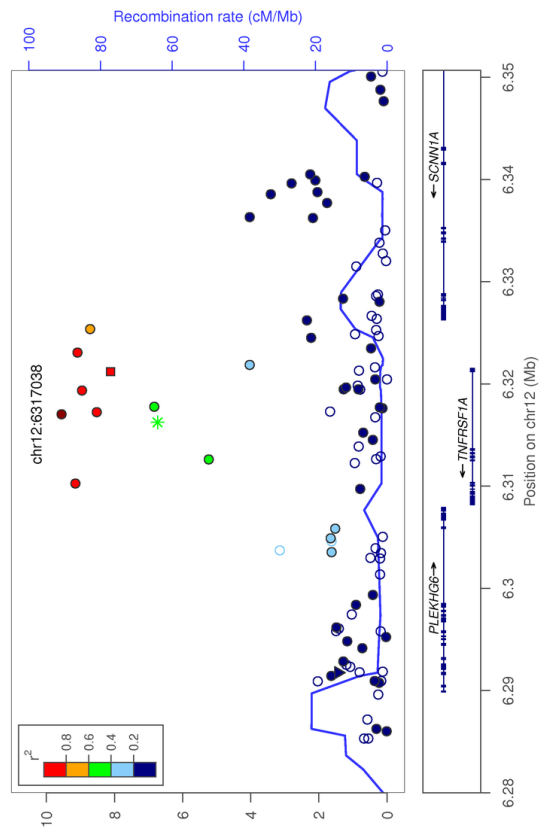

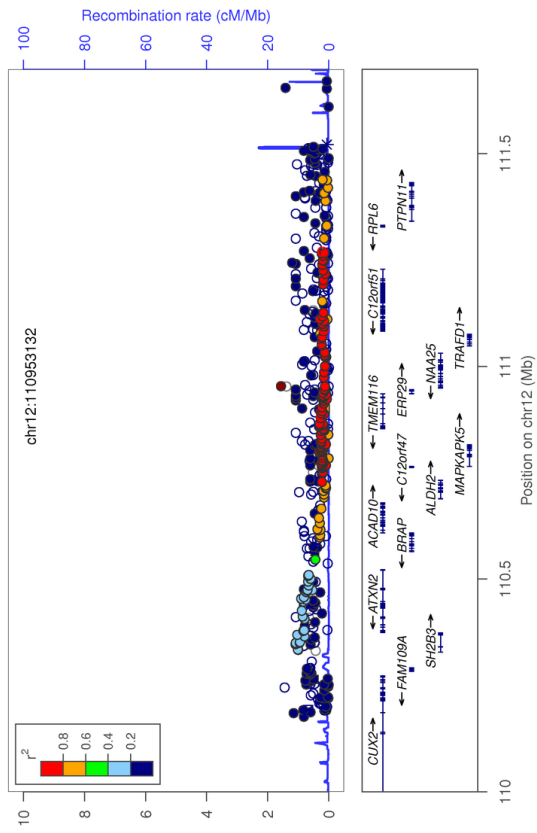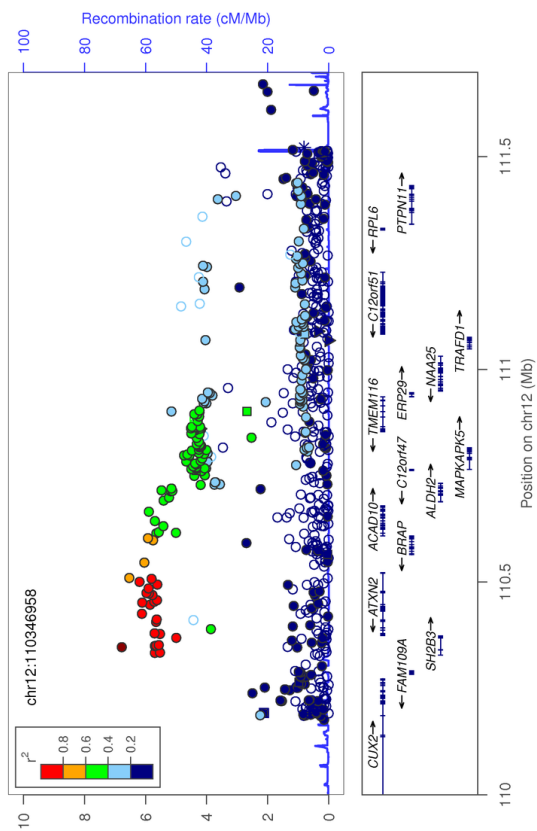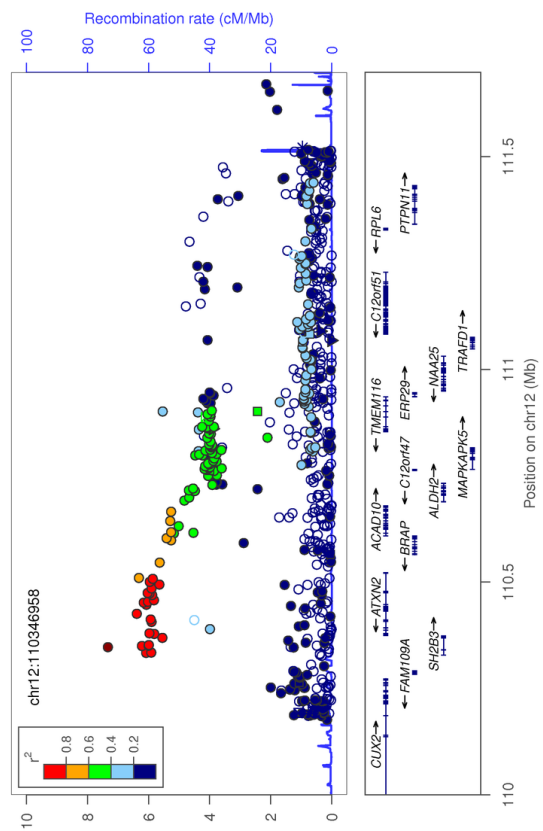

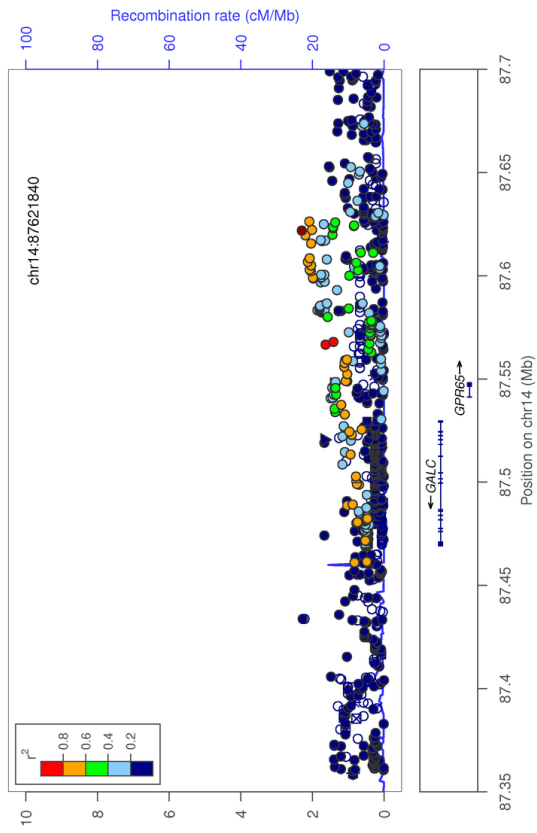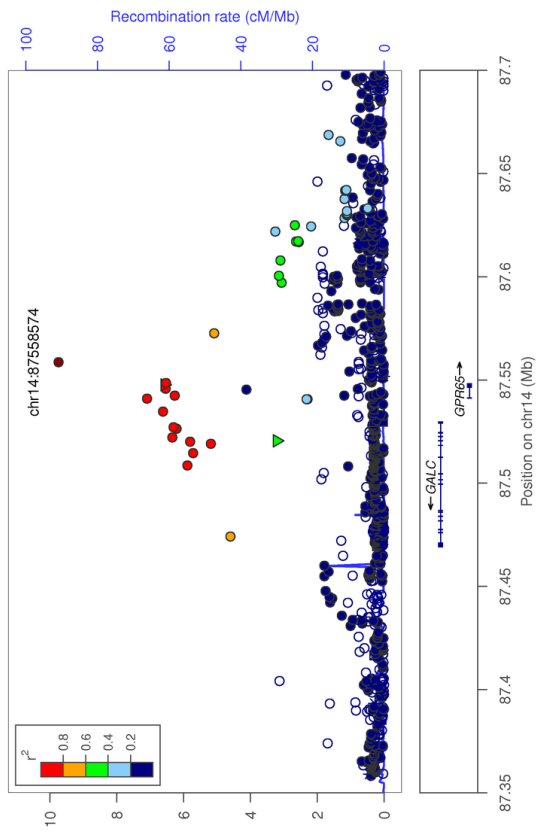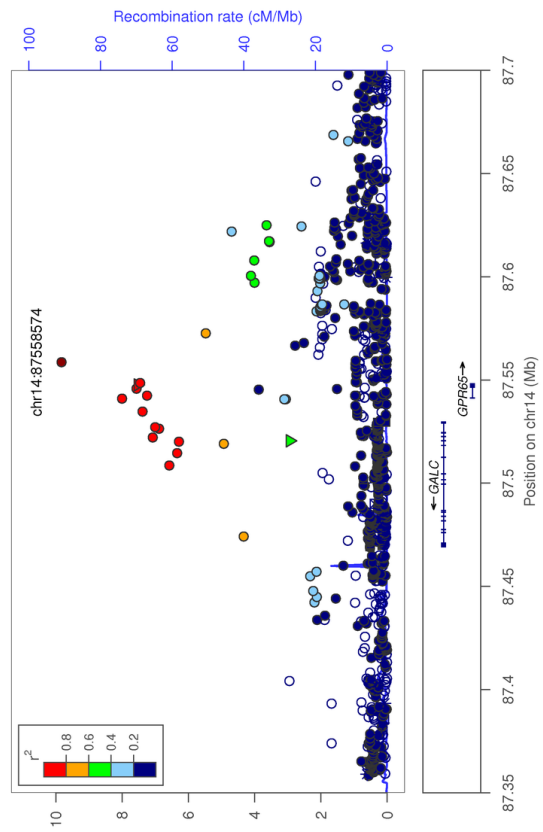

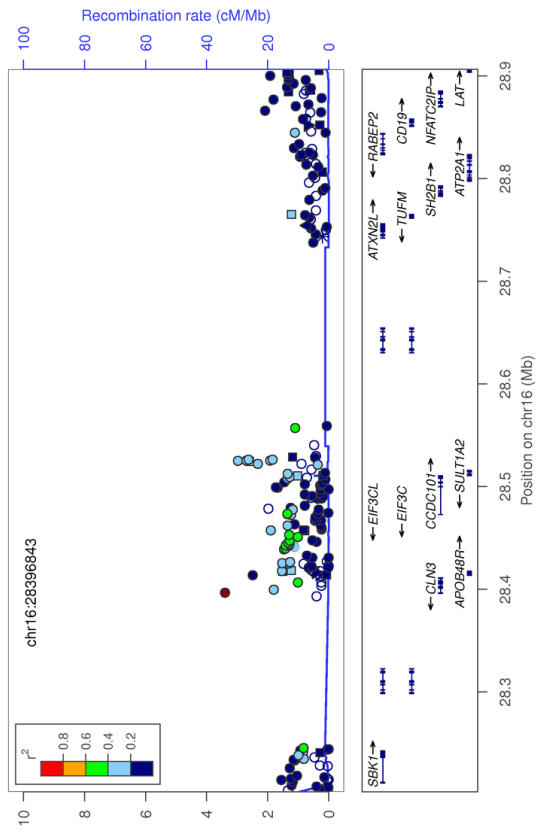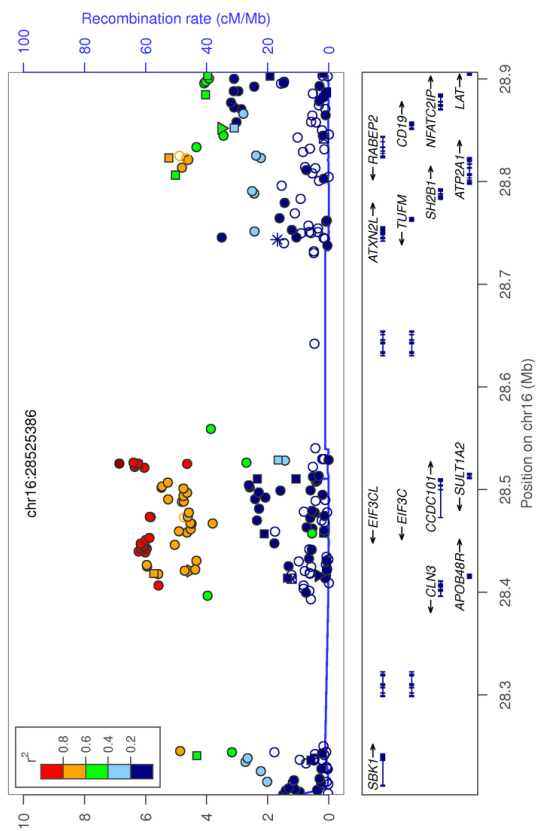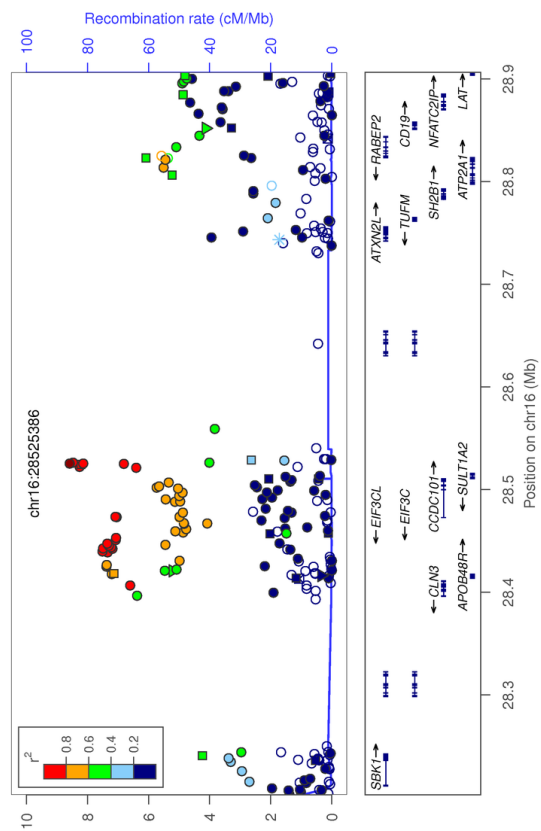

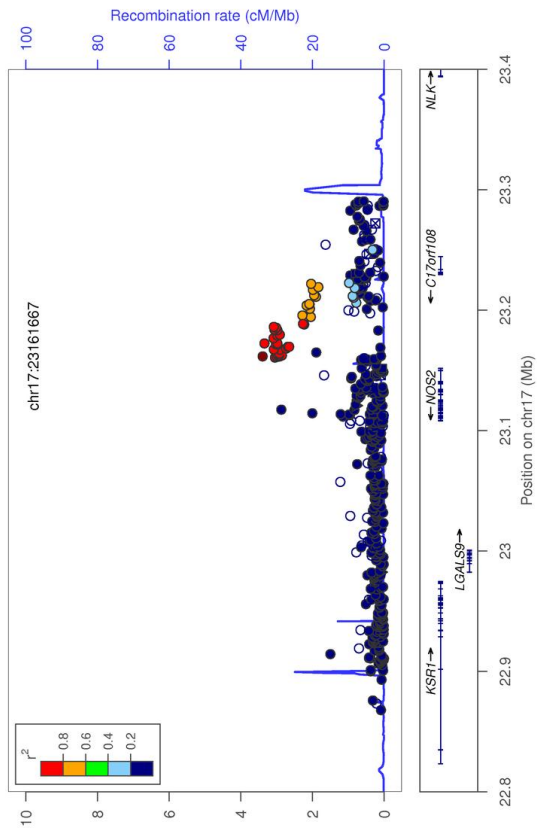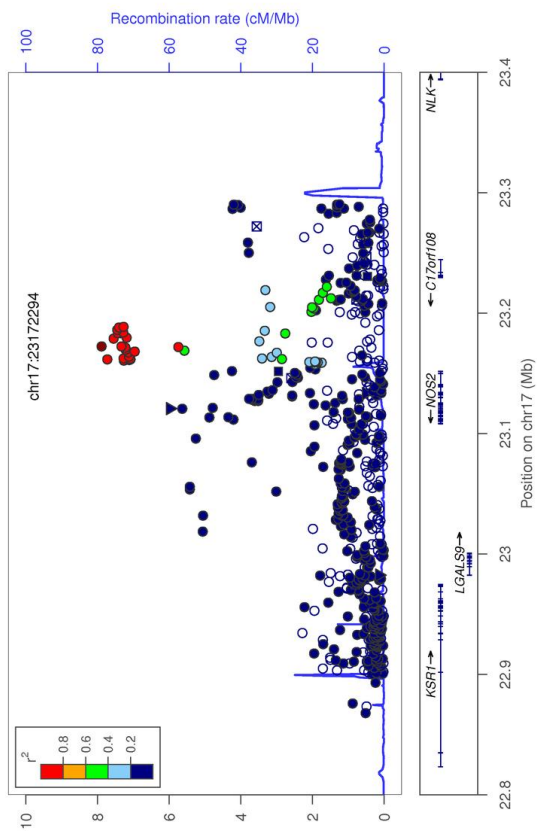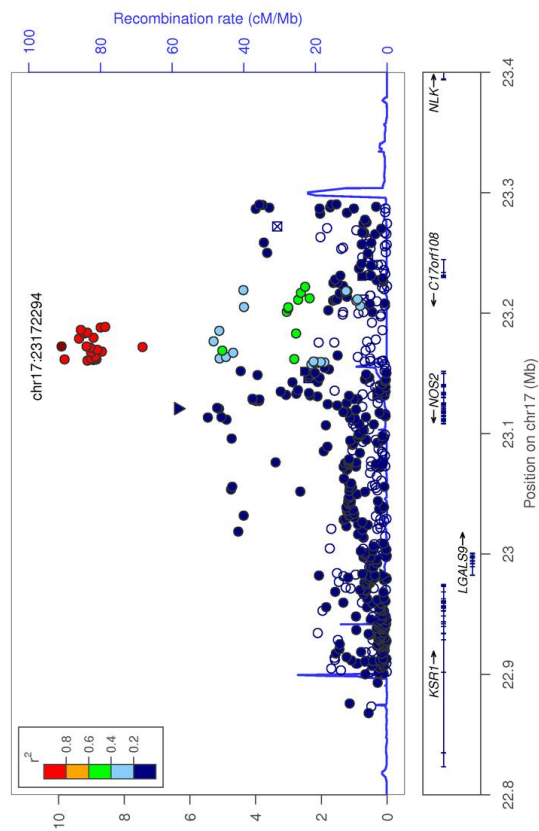



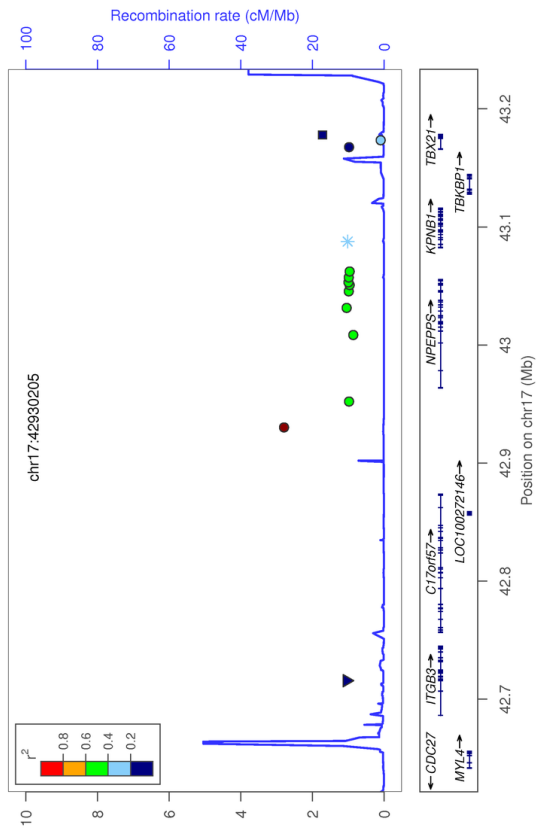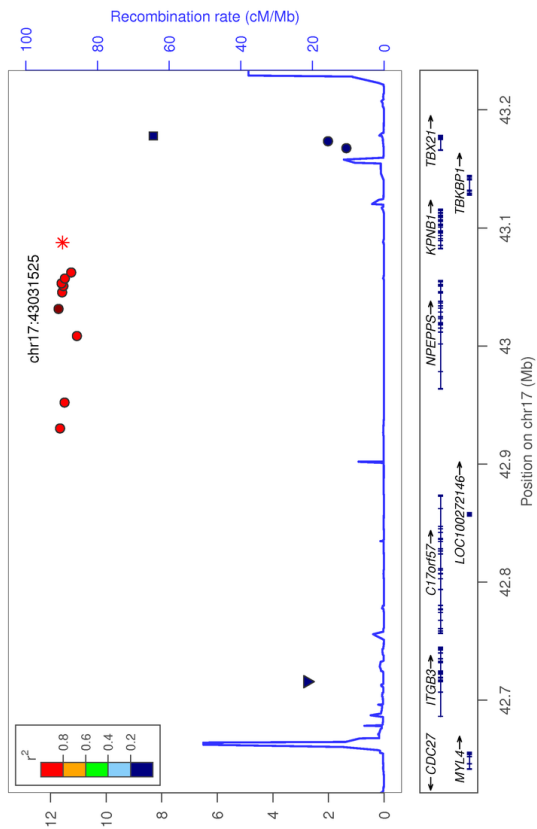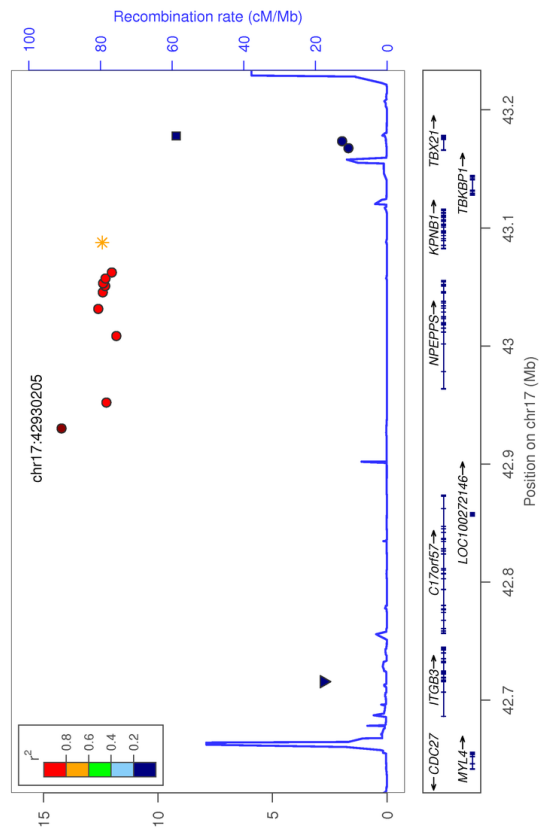

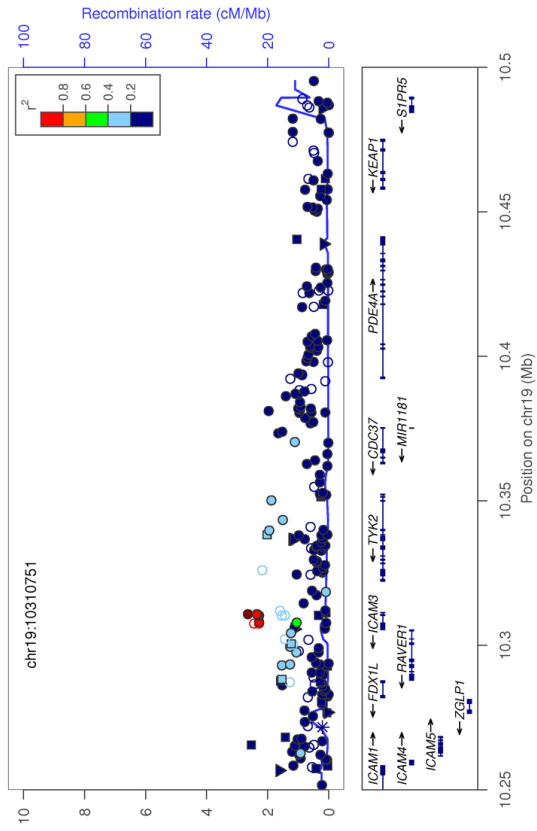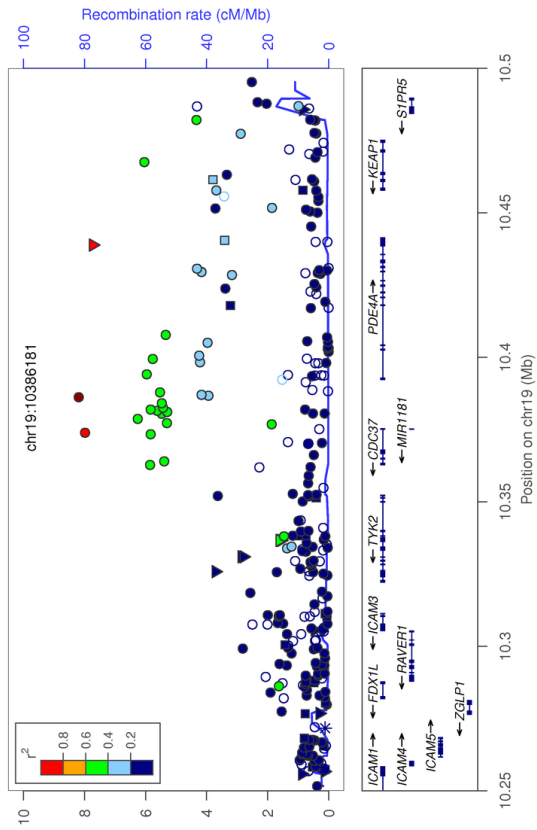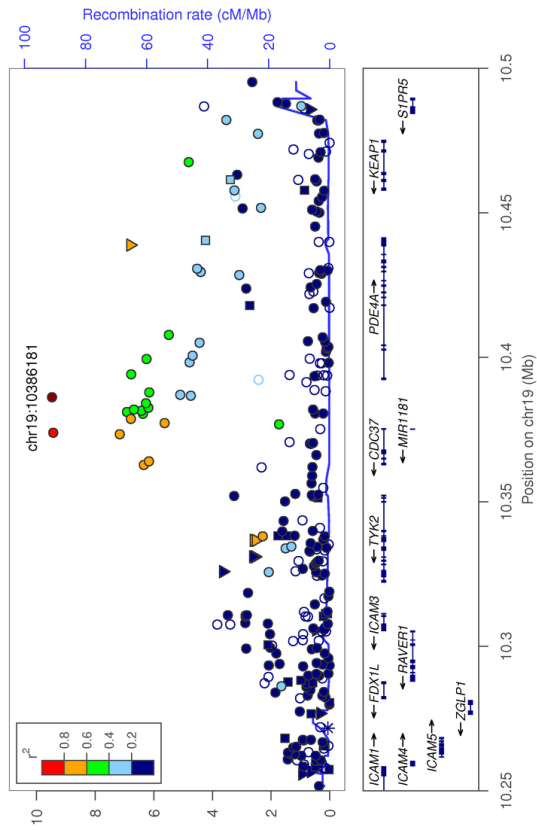

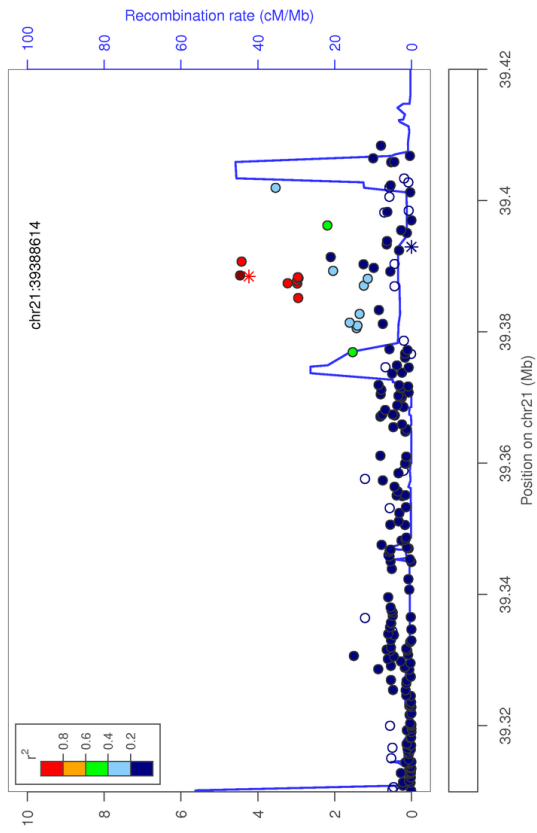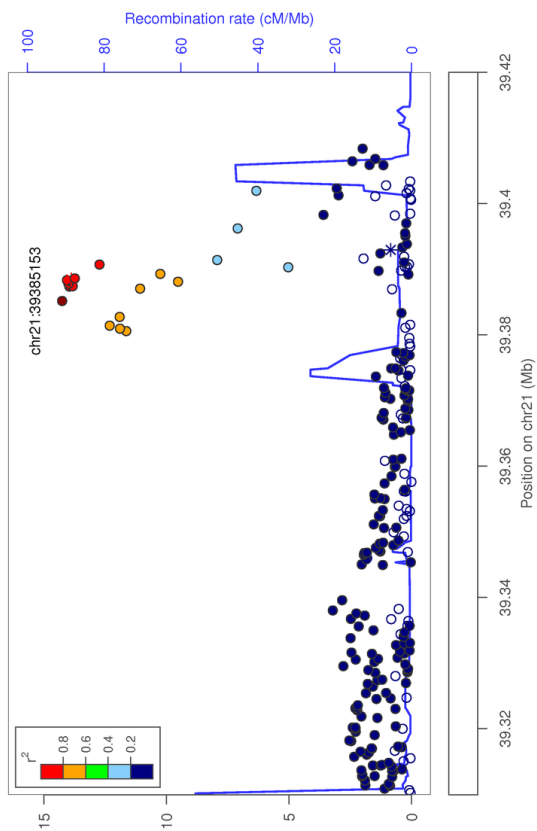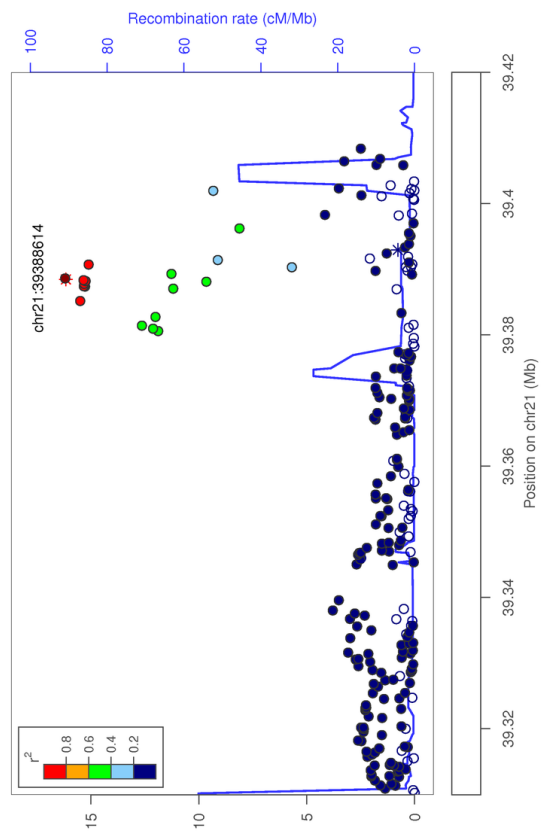

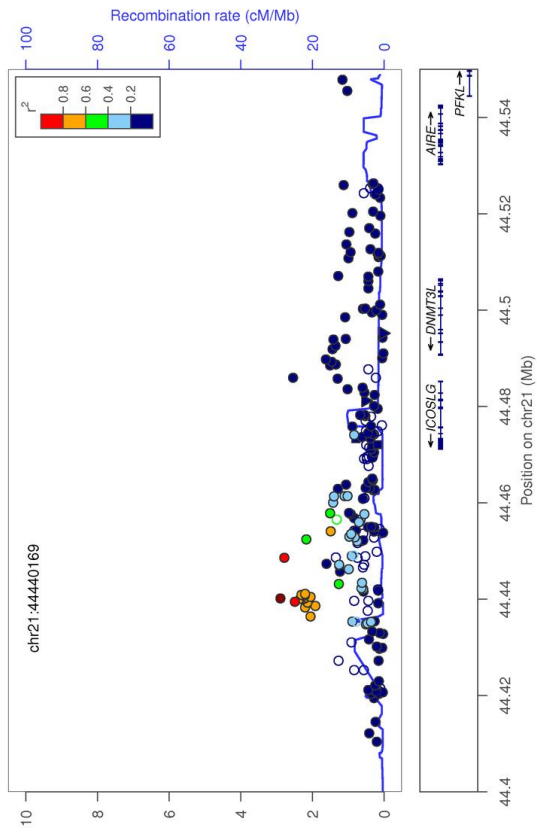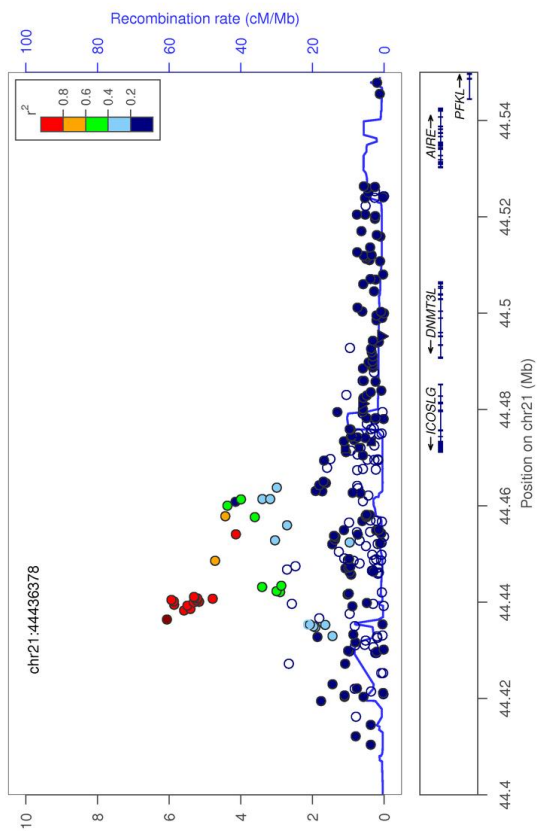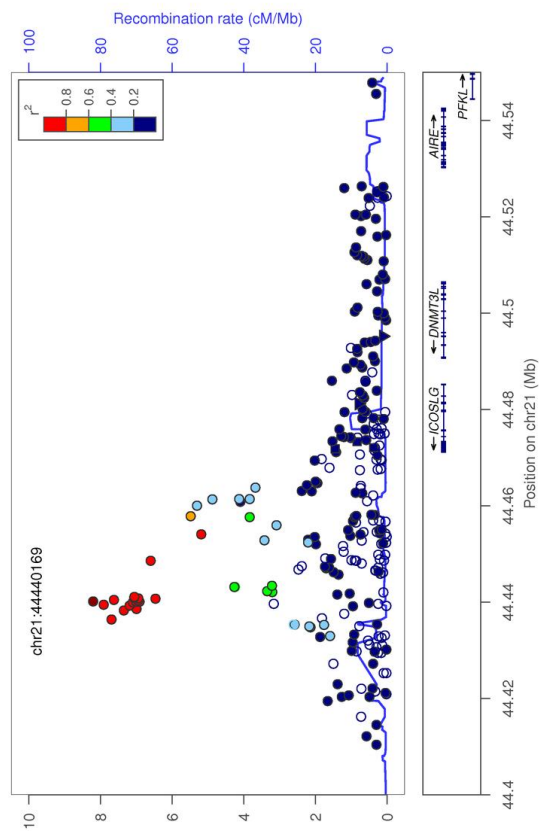

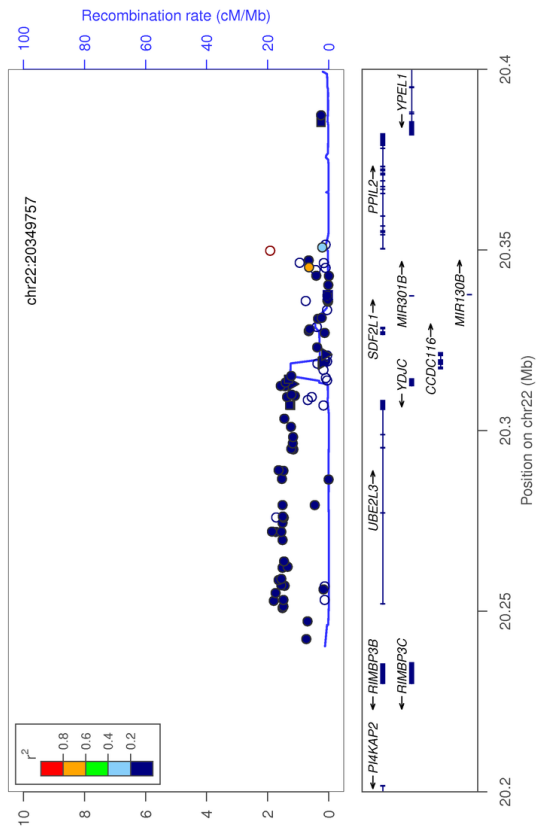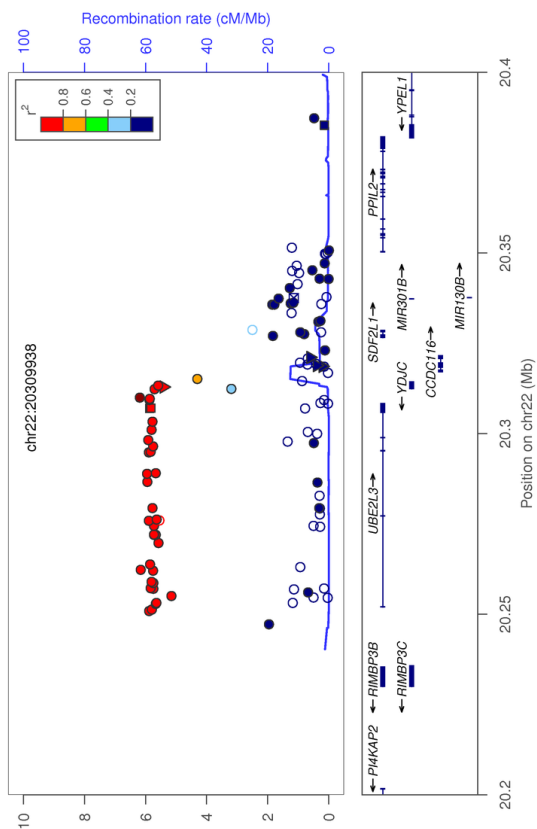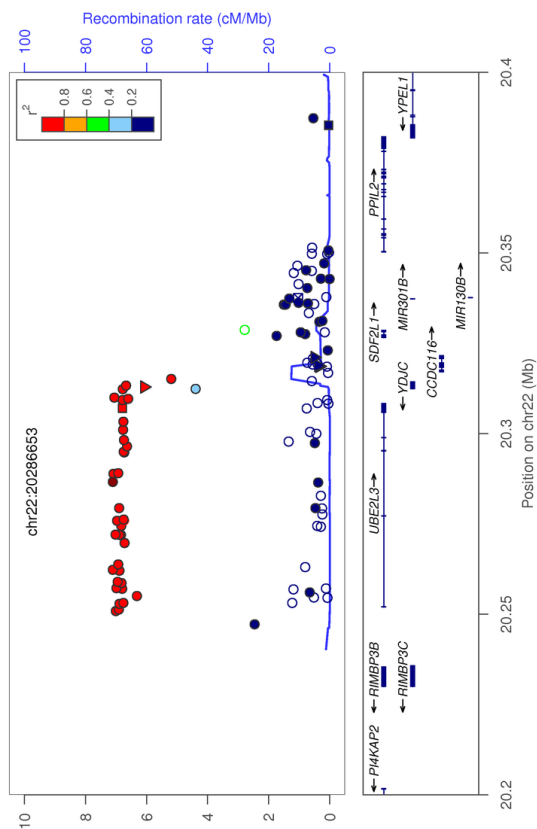

**Supplementary Figure 6** Cell type-specificity of association of SNPs associated with AS with H3K4me3 chromatin marks using ENCODE cell line data. AS-associated SNPs are enriched for association specifically with immunological cell types. Analysis software and reference datasets can be obtained from the developer's web-site (<http://www.broadinstitute.org/mpg/epigwas/>).

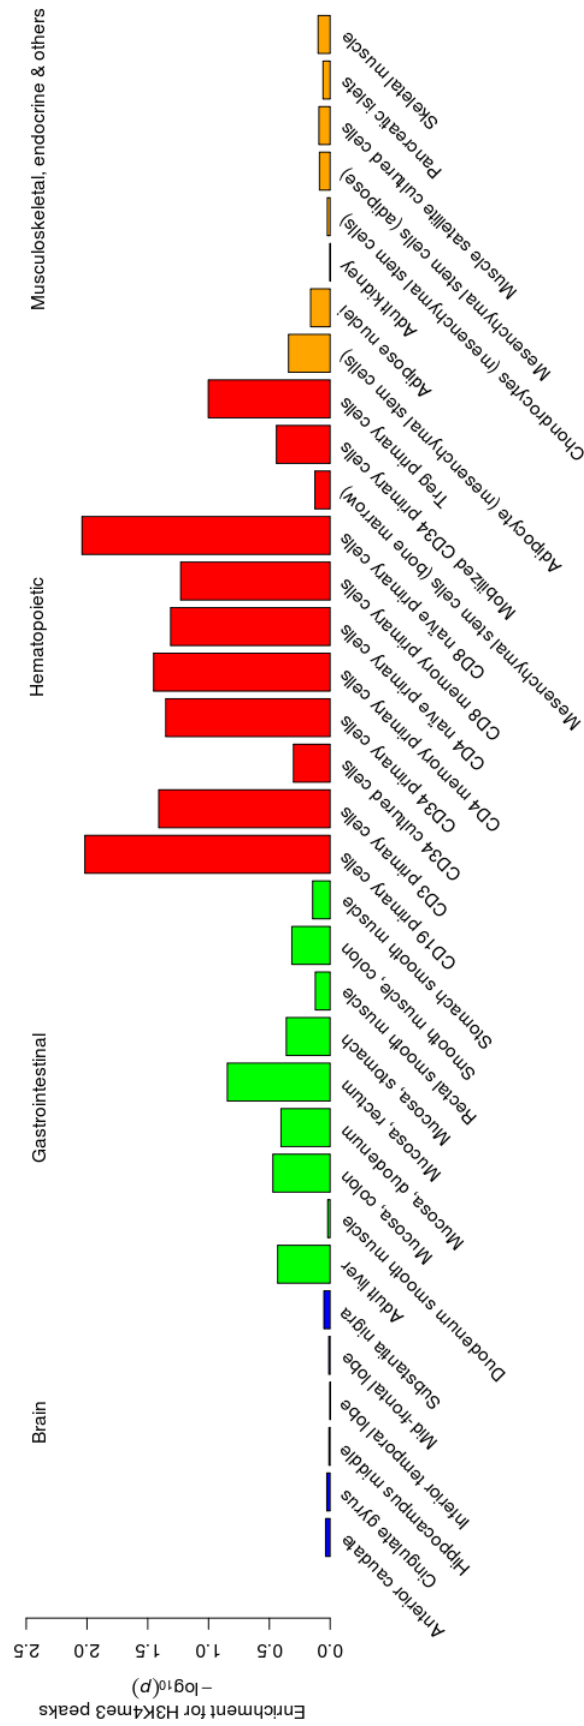

**Supplementary Figure 7** CD4<sup>+</sup> T cells are similar in the peripheral blood of AS patients and healthy controls. PBMC from patients with active AS and age-matched healthy controls (n = 20 for both groups) were stained for cell surface T cell markers and analysed by flow cytometry.

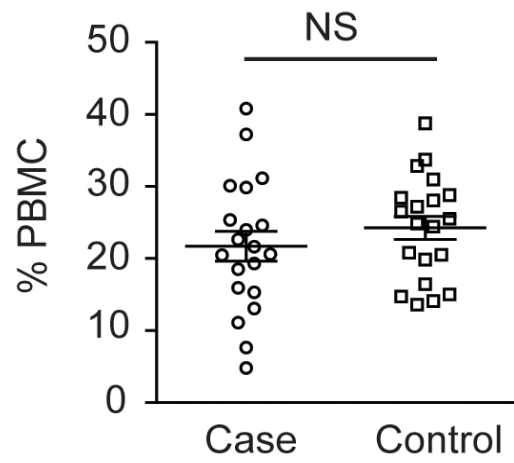

**Supplementary Figure 8** Evidence of association to AS susceptibility in samples of European ancestry in the MHC region. A) Associations over the MHC correcting for ancestry with five principal components without and with conditioning on HLA-B\*27 tagSNP rs116488202. SNS with  $P$ -value  $< 10^{-320}$  are set  $P$ -value =  $1 \times 10^{-320}$ . B) Association at rs2394250, HLA-A\*02 tagSNP, after further conditioning on HLA-B residual association signal rs4947311. The 85kb gap between positions 32,465kb and 32,550kb corresponds to an assembly correction between NCBI human genome build 36 and 37.

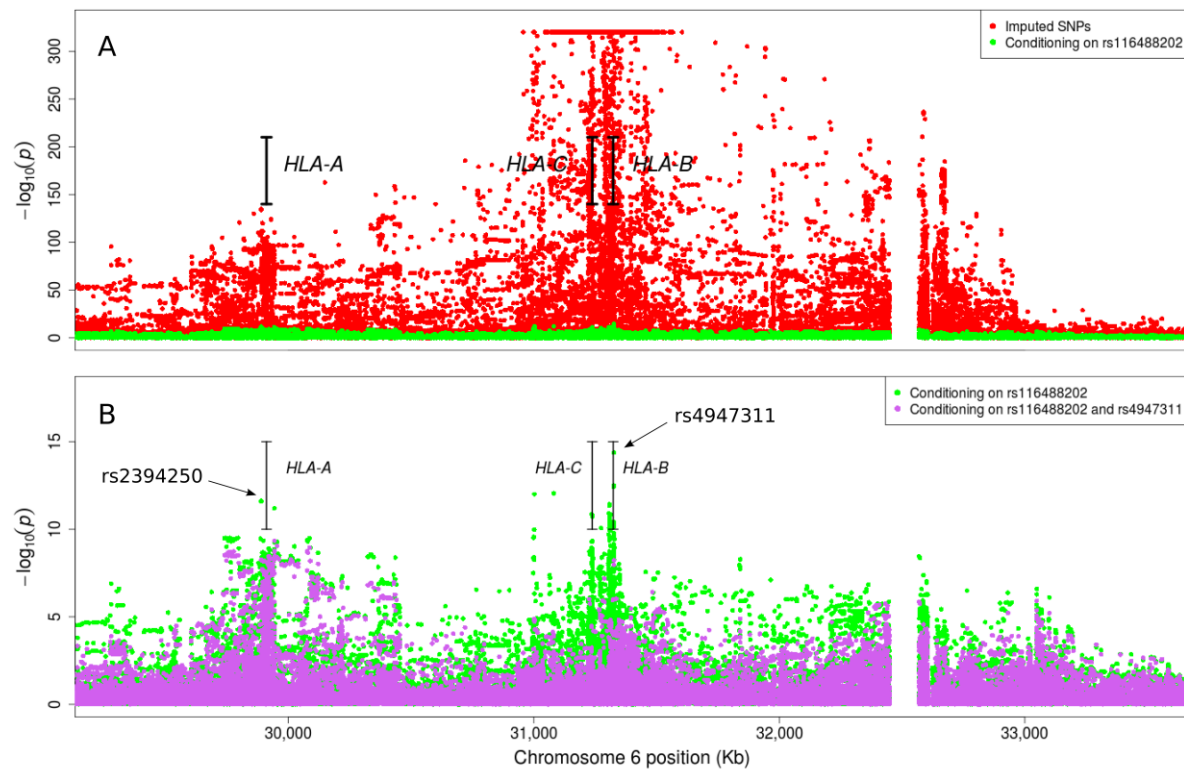



**Supplementary Figure 9** Locus association plots and linkage disequilibrium patterns with lead SNP in unconditional and conditional analysis for each of the loci where an independent signal ( $P$ -value  $< 5 \times 10^{-4}$ ) was observed for the European cohort analysis.

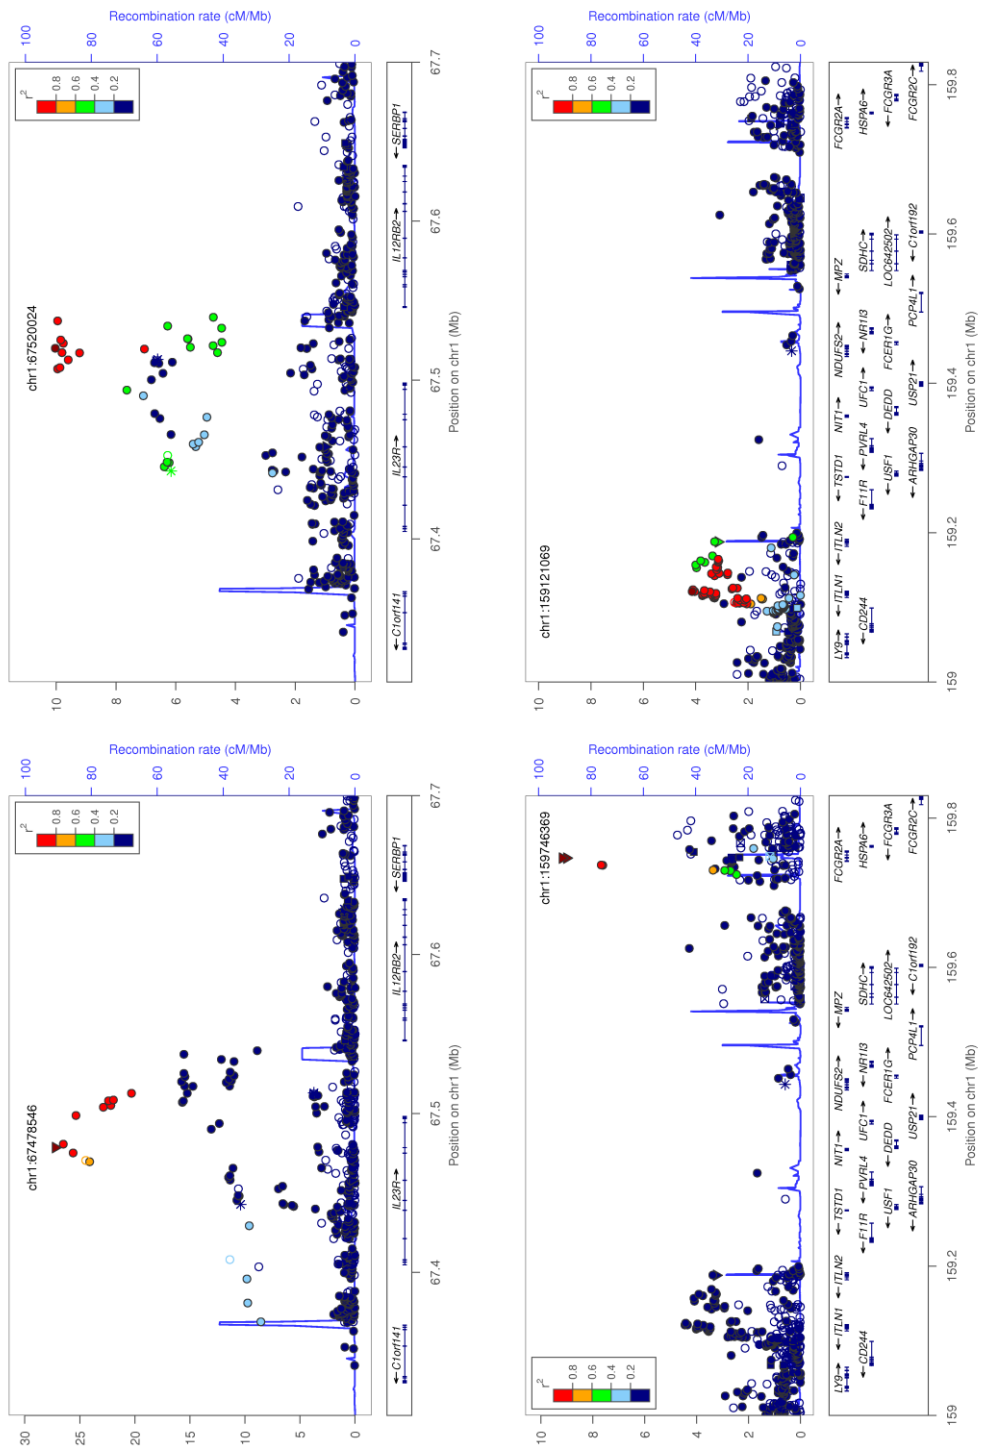

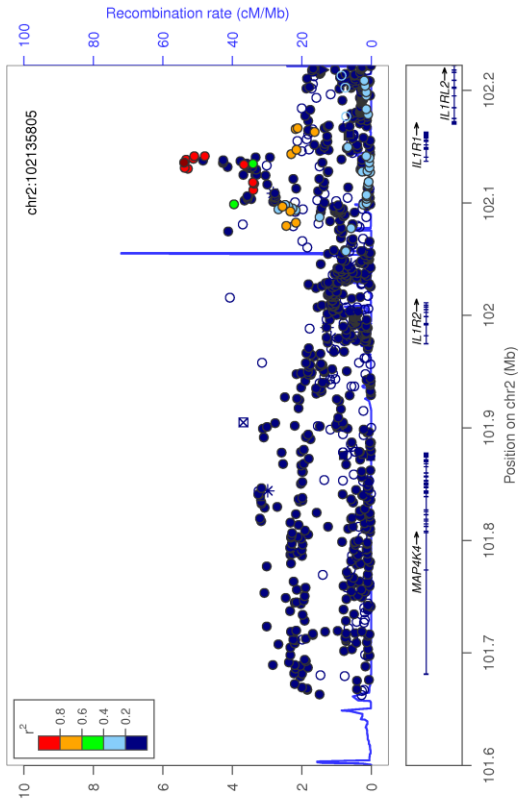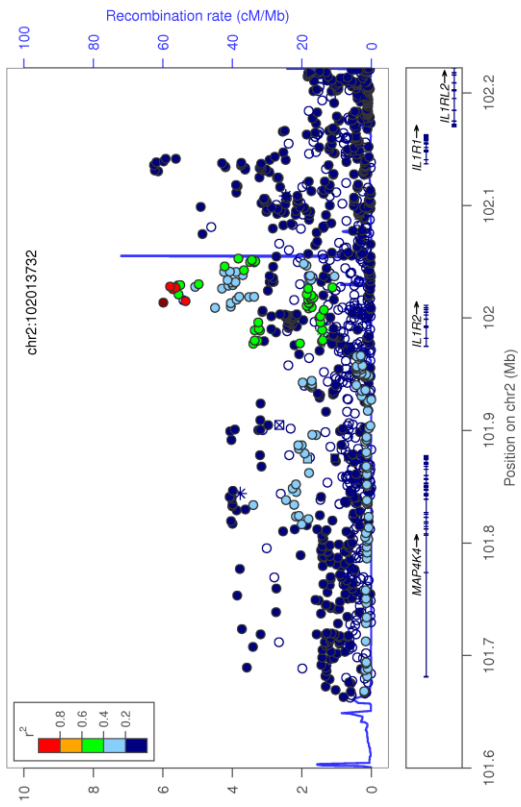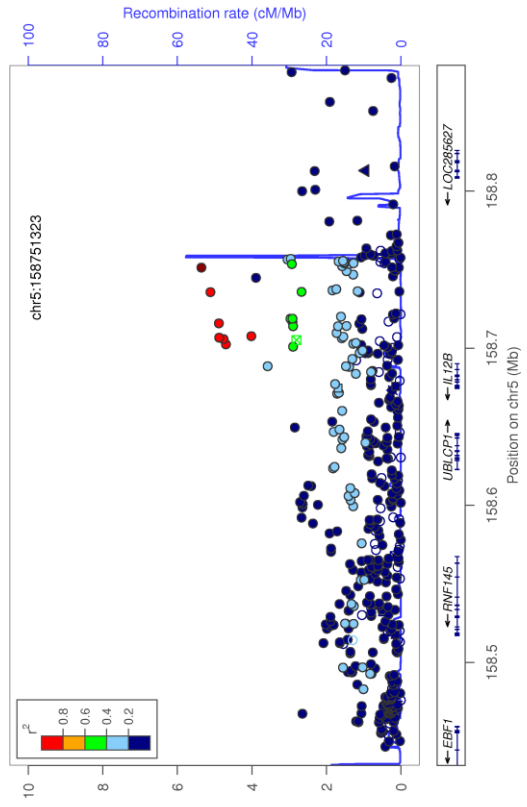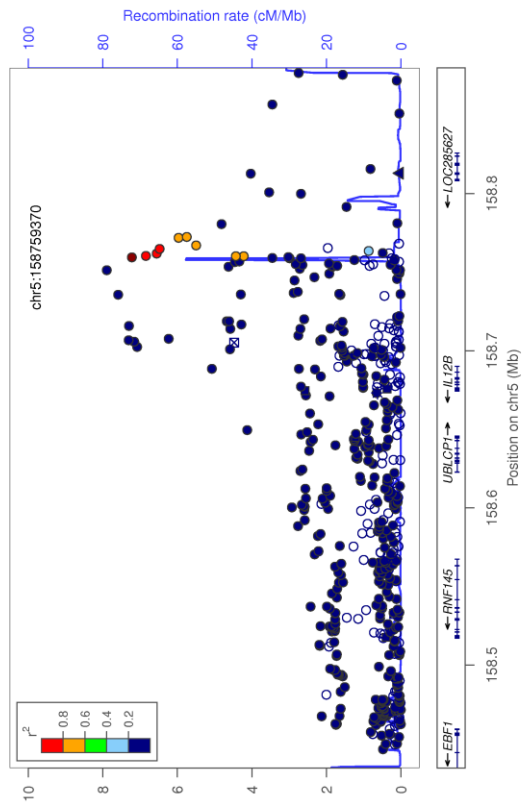

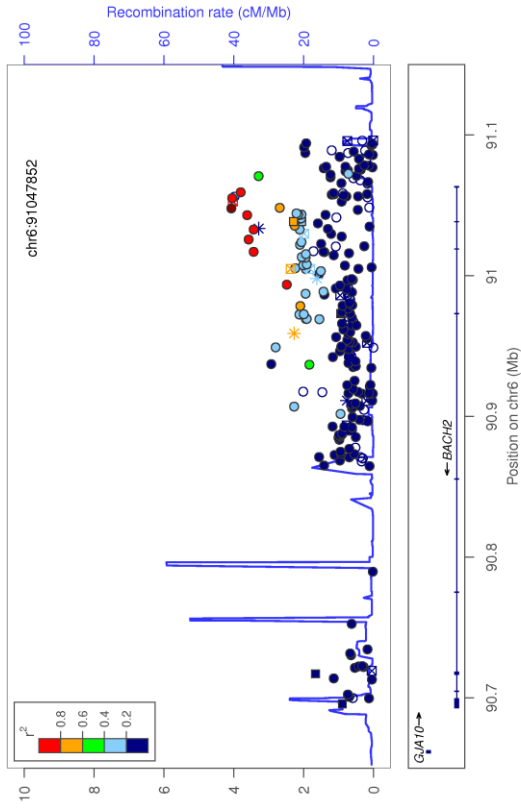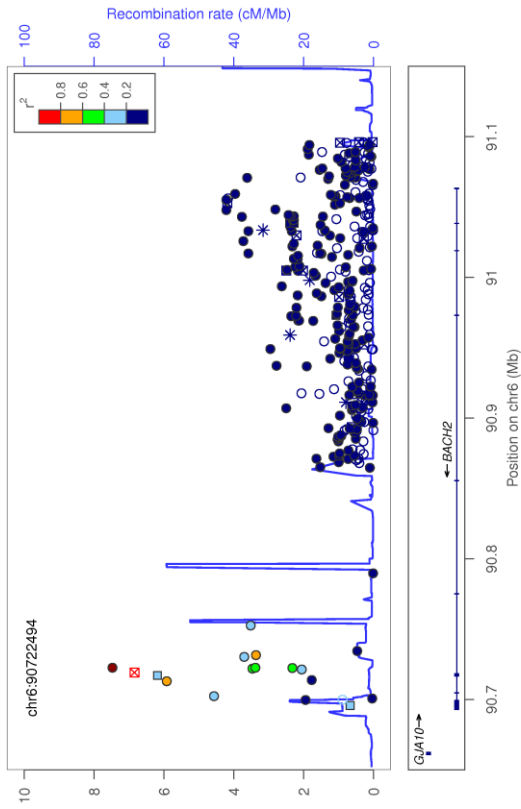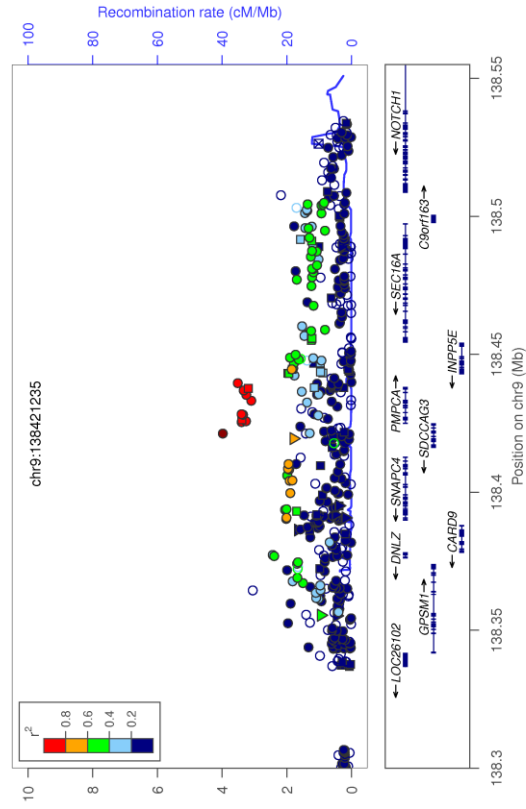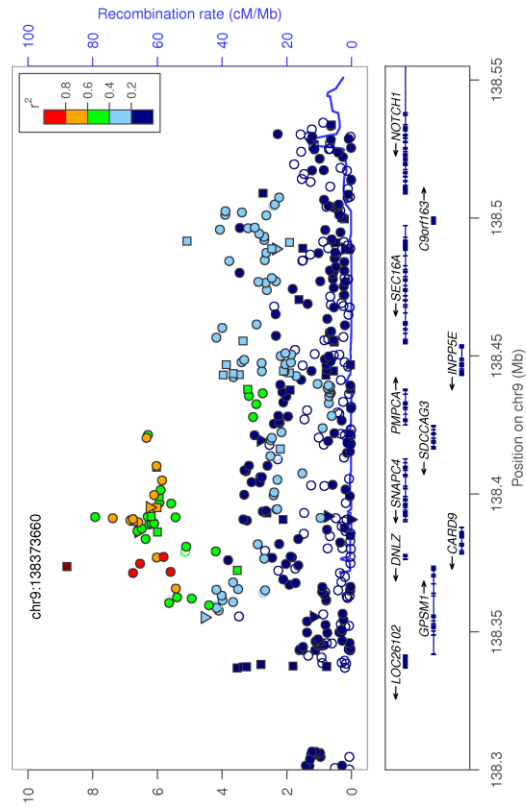

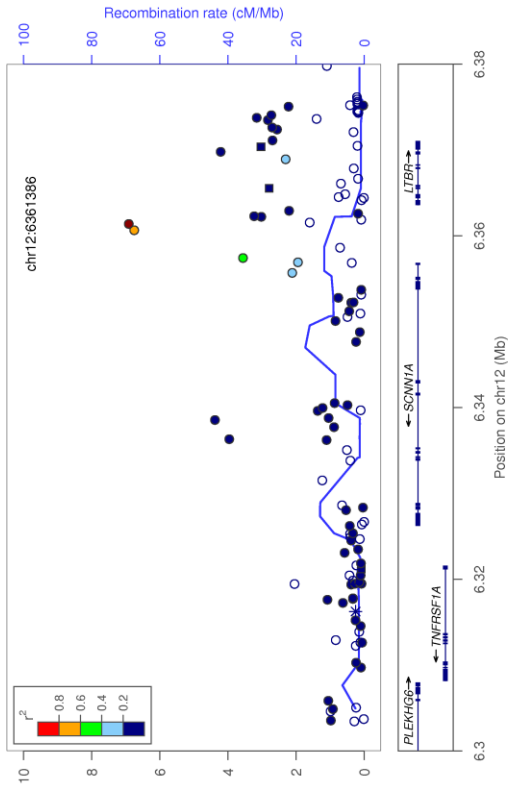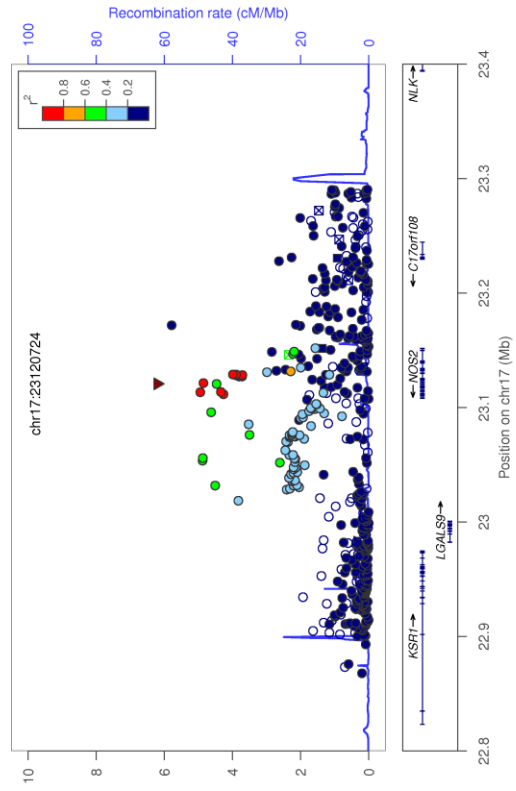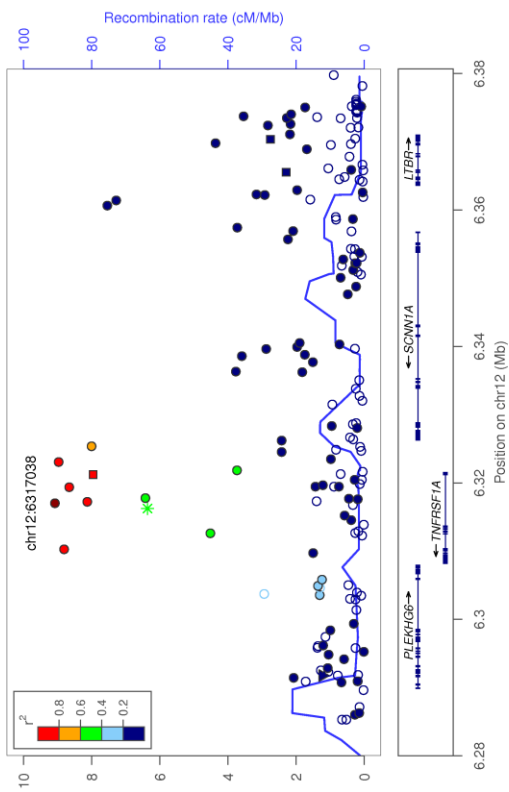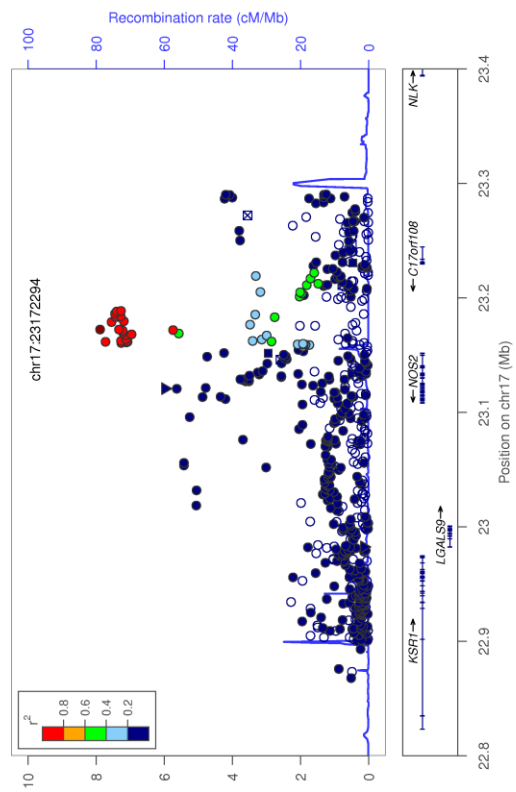

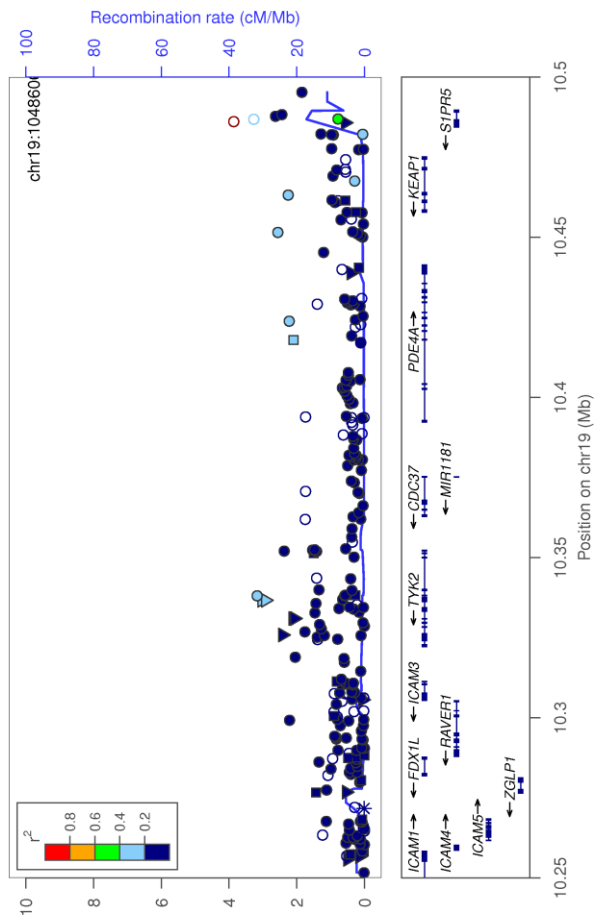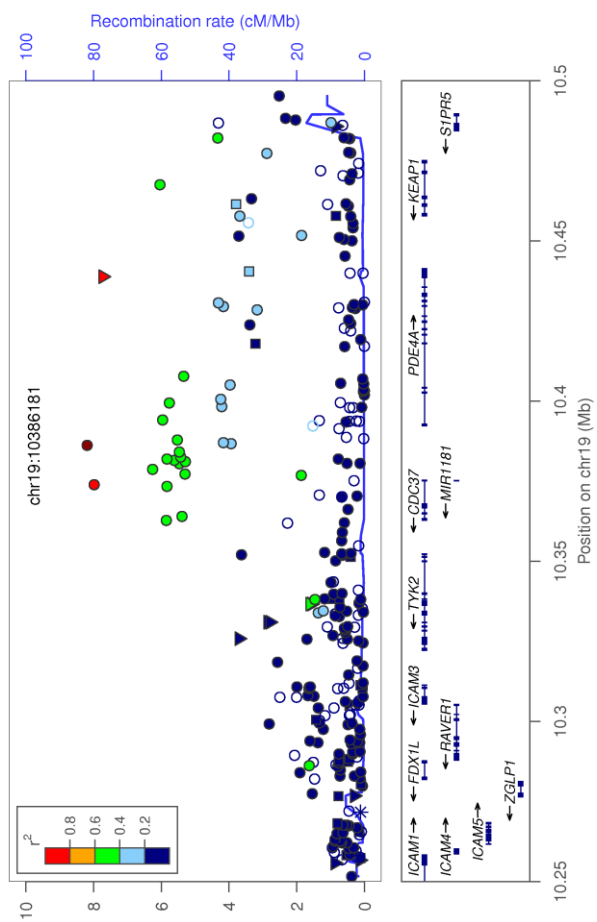

**Supplementary Figure 10** Principal components analysis of ImmunoChip samples with 7 HapMap populations. Individuals are plotted for the first two principal components.

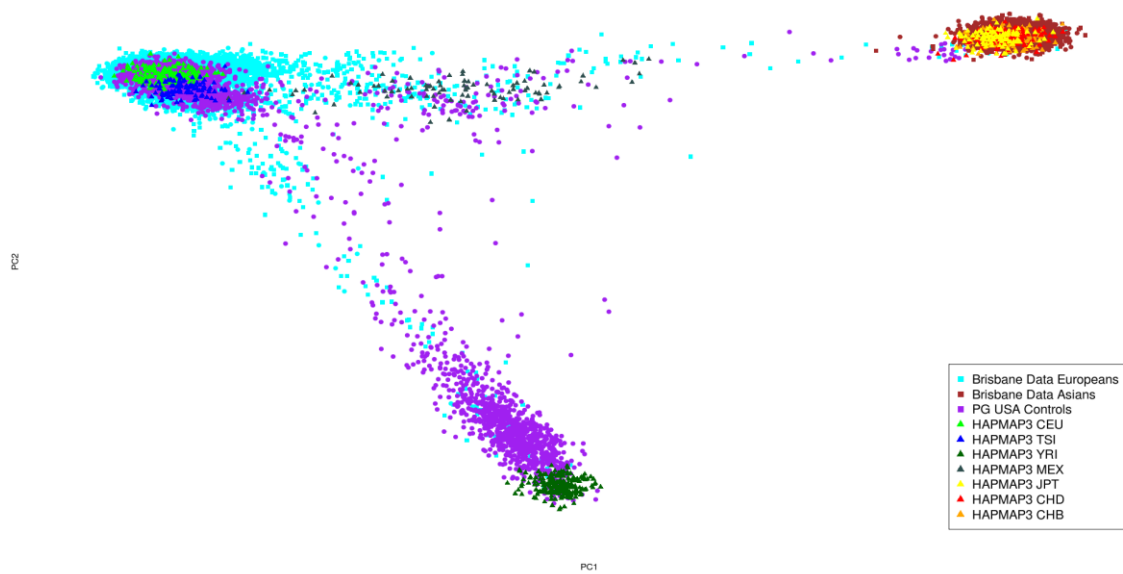

**Supplementary Figure 11** Principal components analysis of ImmunoChip samples of European ancestry. Individuals are plotted for the first two principal components. Principal component one (plotted on the y-axis) correlates with the North-South gradient of European origin of individuals.

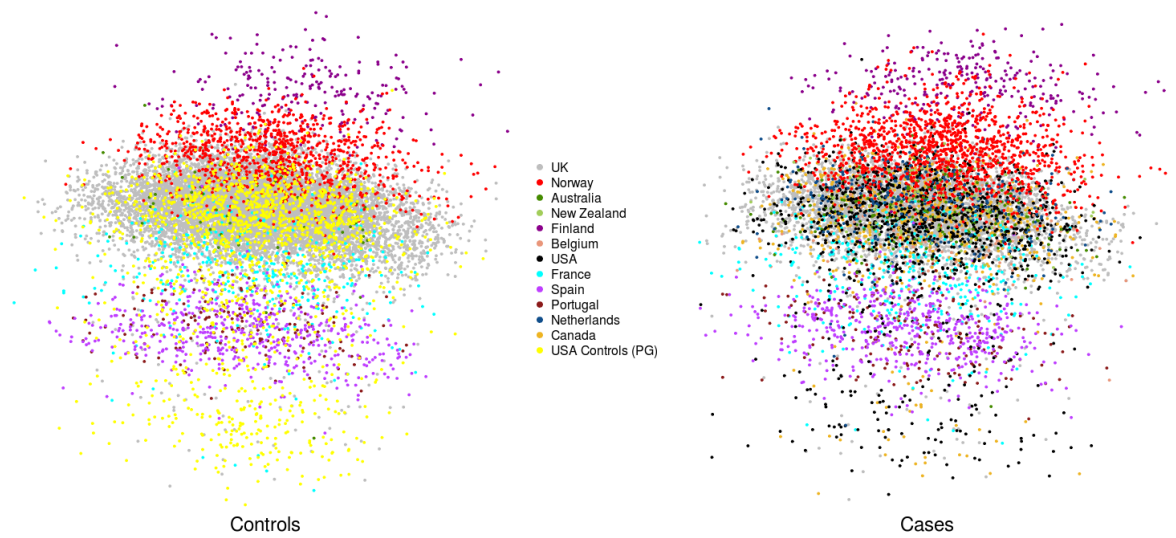

**Supplementary Figure 12** Principal components analysis of ImmunoChip samples of East Asian ancestry.

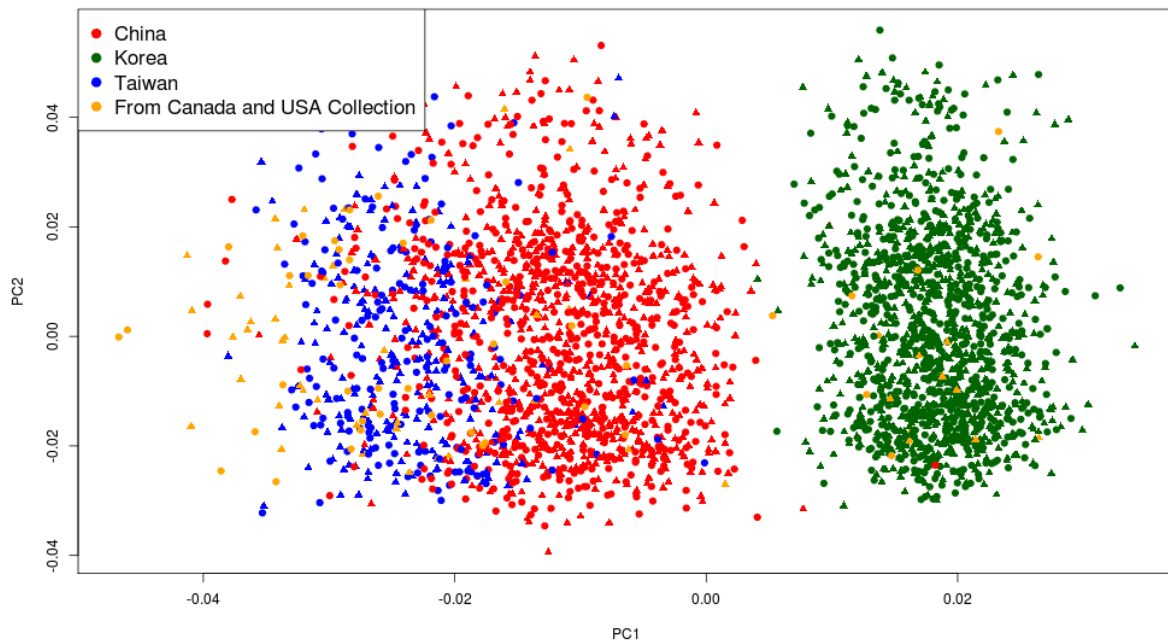



## Supplementary Note

### Membership of Wellcome Trust Case Control Consortium 2 (WTCCC2)

#### Management Committee

Peter Donnelly (Chair)<sup>1,2</sup>, Ines Barroso (Deputy Chair)<sup>3</sup>, Jenefer M Blackwell<sup>4,5</sup>, Elvira Bramon<sup>6</sup>, Matthew A Brown<sup>7</sup>, Juan P Casas<sup>8</sup>, Aiden Corvin<sup>9</sup>, Panos Deloukas<sup>3</sup>, Audrey Duncanson<sup>10</sup>, Janusz Jankowski<sup>11</sup>, Hugh S Markus<sup>12</sup>, Christopher G Mathew<sup>13</sup>, Colin NA Palmer<sup>14</sup>, Robert Plomin<sup>15</sup>, Anna Rautanen<sup>1</sup>, Stephen J Sawcer<sup>16</sup>, Richard C Trembath<sup>13</sup>, Ananth C Viswanathan<sup>17</sup>, Nicholas W Wood<sup>18</sup>

#### Data and Analysis Group

Chris C A Spencer<sup>1</sup>, Gavin Band<sup>1</sup>, Céline Bellenguez<sup>1</sup>, Colin Freeman<sup>1</sup>, Garrett Hellenthal<sup>1</sup>, Eleni Giannoulatou<sup>1</sup>, Matti Pirinen<sup>1</sup>, Richard Pearson<sup>1</sup>, Amy Strange<sup>1</sup>, Zhan Su<sup>1</sup>, Damjan Vukcevic<sup>1</sup>, Peter Donnelly<sup>1,2</sup>

#### DNA, Genotyping, Data QC and Informatics Group

Cordelia Langford<sup>3</sup>, Sarah E Hunt<sup>3</sup>, Sarah Edkins<sup>3</sup>, Rhian Gwilliam<sup>3</sup>, Hannah Blackburn<sup>3</sup>, Suzannah J Bumpstead<sup>3</sup>, Serge Dronov<sup>3</sup>, Matthew Gillman<sup>3</sup>, Emma Gray<sup>3</sup>, Naomi Hammond<sup>3</sup>, Alagurevathi Jayakumar<sup>3</sup>, Owen T McCann<sup>3</sup>, Jennifer Liddle<sup>3</sup>, Simon C Potter<sup>3</sup>, Radhi Ravindrarajah<sup>3</sup>, Michelle Ricketts<sup>3</sup>, Matthew Waller<sup>3</sup>, Paul Weston<sup>3</sup>, Sara Widaa<sup>3</sup>, Pamela Whittaker<sup>3</sup>, Ines Barroso<sup>3</sup>, Panos Deloukas<sup>3</sup>.

#### Publications Committee

Christopher G Mathew (Chair)<sup>13</sup>, Jenefer M Blackwell<sup>4,5</sup>, Matthew A Brown<sup>7</sup>, Aiden Corvin<sup>9</sup>, Chris C A Spencer<sup>1</sup>

1 Wellcome Trust Centre for Human Genetics, University of Oxford, Roosevelt Drive, Oxford OX3 7BN, UK; 2 Dept Statistics, University of Oxford, Oxford OX1 3TG, UK; 3 Wellcome Trust Sanger Institute, Wellcome Trust Genome Campus, Hinxton, Cambridge CB10 1SA, UK; 4 Telethon Institute for Child Health Research, Centre for Child Health Research, University of Western Australia, 100 Roberts Road, Subiaco, Western Australia 6008; 5 Cambridge Institute for Medical Research, University of Cambridge School of Clinical Medicine, Cambridge CB2 0XY, UK; 6 Department of Psychosis Studies, NIHR Biomedical Research Centre for Mental Health at the Institute of Psychiatry, King's College London and The South London and Maudsley NHS Foundation Trust, Denmark Hill, London SE5 8AF, UK; 7 University of Queensland Diamantina Institute, Brisbane, Queensland, Australia; 8 Dept Epidemiology and Population Health, London School of Hygiene and Tropical Medicine, London WC1E 7HT and Dept Epidemiology and Public Health, University College London WC1E 6BT, UK; 9 Neuropsychiatric Genetics Research Group, Institute of Molecular Medicine, Trinity College Dublin, Dublin 2, Eire; 10 Molecular and Physiological Sciences, The Wellcome Trust, London NW1 2BE; 11 Department of Oncology, Old Road Campus, University of Oxford, Oxford OX3 7DQ, UK, Digestive Diseases Centre, Leicester Royal Infirmary, Leicester LE7 7HH, UK and Centre for Digestive Diseases, Queen Mary University of London, London E1 2AD, UK; 12 Clinical Neurosciences, St George's University of London, London SW17 0RE; 13 King's College London Dept Medical and Molecular Genetics, King's Health Partners, Guy's Hospital, London SE1 9RT, UK; 14 Biomedical Research Centre, Ninewells Hospital and Medical School, Dundee DD1 9SY, UK; 15 King's College London Social, Genetic and Developmental Psychiatry Centre, Institute of Psychiatry, Denmark Hill, London SE5 8AF, UK; 16 University of Cambridge Dept Clinical Neurosciences, Addenbrooke's

Hospital, Cambridge CB2 0QQ, UK; 17NIHR Biomedical Research Centre for Ophthalmology, Moorfields Eye Hospital NHS Foundation Trust and UCL Institute of Ophthalmology, London EC1V 2PD, UK; 18Dept Molecular Neuroscience, Institute of Neurology, Queen Square, London WC1N 3BG, UK.

### **Membership of Spondyloarthritis Research Consortium of Canada (SPARCC)**

#### Sample Collection

Dafna Gladman<sup>1,2,3</sup>, Nigil Haroon<sup>4</sup>, Robert Inman<sup>4</sup>, Walter Maksymowych<sup>5</sup>, and Proton Rahman<sup>6</sup>.

1 Division of Rheumatology, University of Toronto, Toronto, Canada; 2 Toronto Western Research Institute, Toronto, Canada; 3 Psoriatic Arthritis Program, University Health Network; 4 Division of Rheumatology, Toronto Western Hospital, Toronto, Canada; 5 Department of Medicine, University of Alberta, Canada; 6 Memorial University of Newfoundland, Newfoundland, Canada.

### **Membership of Groupe Française d'Etude Génétique des Spondylarthrites (GFEGS)**

#### Sample Collection

Maxime Breban<sup>1,2</sup>, Gilles Chiochia<sup>1,2</sup>, Henri-Jean Garchon<sup>1,2</sup>, Roula Said-Nahal<sup>2</sup>, Félicie Costantino<sup>2</sup>, Ariane Leboime<sup>2</sup>

1 Institut Cochin, Université Paris-Descartes, CNRS (UMR 8104), INSERM U1016, France; 2 Ambroise Paré Hospital, Assistance Publique Hôpitaux de Paris, Versailles-Saint-Quentin en Yvelines University, Boulogne-Billancourt, France.

### **Membership of Australo-Anglo-American Spondyloarthritis Consortium (TASC)**

#### Management Committee

John D. Reveille<sup>1</sup>, Bryan Paul Wordsworth<sup>2</sup> and Matthew A. Brown<sup>3</sup>

#### Data and Analysis Group

Adrian Cortes<sup>3</sup>, Philip C. Robinson<sup>3</sup>, Paul Leo<sup>3</sup>, Tony J. Kenna<sup>3</sup>, Matthew A. Brown<sup>3</sup>

#### DNA, Genotyping and Data QC

Johanna Hadler<sup>3</sup>, Katie Cremin<sup>3</sup>, Karena Pryce<sup>3</sup>, Jessica Harris<sup>3</sup>

#### Sample Collection

Jenny P. Pointon<sup>2</sup>, Tugce Karaderi<sup>2</sup>, Michael Weisman<sup>4</sup>, Michael Ward<sup>5</sup>, Linda A. Bradbury<sup>3</sup>, Robert D. Inman<sup>6</sup>, John D. Reveille<sup>1</sup>, Bryan Paul Wordsworth<sup>2</sup> and Matthew A. Brown<sup>3</sup>

1 Rheumatology and Clinical Immunogenetics, University of Texas Health Science Center at Houston, Houston, Texas, USA; 2 National Institute for Health Research (NIHR) Oxford Musculoskeletal Biomedical Research Unit, Nuffield Orthopaedic Centre, Headington, Oxford, United Kingdom; 3 University of Queensland Diamantina Institute, Translational Research Institute, Brisbane, Australia; 4 Department of Medicine/Rheumatology, Cedars-Sinai Medical Center, Los Angeles, California, USA; 5 National Institute of Arthritis and Musculoskeletal and Skin Diseases, National Institutes of Health, Bethesda, Maryland, USA; 6 Division of Rheumatology, Toronto Western Hospital, Toronto, Canada.

### **Membership of Nord-Trøndelag health study (HUNT)**

#### Sample Collection

Vibeke Videm<sup>1,2</sup>

1 Department of Laboratory Medicine, Children's and Women's Health, Norwegian University of Science and Technology, Trondheim, Norway; 2 Department of Immunology and Transfusion Medicine, Trondheim University Hospital, Norway.

## SNP effect transformation from the linear model to the liability scale to calculate SNP disease odds ratios

SNP association analysis was performed with a linear mixed model with the package FaST-LMM. For each SNP, the output of FaST-LMM includes the effect size and its significance. In the linear mixed model the disease status is coded as  $y_{01}$  (controls 0; cases 1) and the genotype  $x$  is coded with the number of minor alleles an individual has (0, 1 or 2):

$$y_{01} = \mu + b_{01} \cdot x + e.$$

This model can be rewritten, solving for  $x$ , as:

$$x = \mu + a \cdot y_{01} + e,$$

which test the mean difference of  $x$  between cases and controls.

The SNP effect  $b_{01}$  is given by the formula:

$$b_{01} = \text{cov}(y_{01}, x) / \text{var}(x),$$

and equivalently:

$$a = \text{cov}(y_{01}, x) / \text{var}(y_{01}).$$

Substituting  $\text{cov}(y_{01}, x)$  it follows that:

$$a = b_{01} \cdot \text{var}(x) / \text{var}(y_{01}).$$

If we let  $p_1$  be the minor allele frequency in cases and  $p_0$  in controls, by definition:

$E(x | y_{01} = 1) = \mu + a = 2 \cdot p_1$  and  $E(x | y_{01} = 0) = \mu = 2 \cdot p_0$ , so it follows that:

$$a = 2 \cdot (p_1 - p_0).$$

The odds ratio (OR) for disease is given by the formula:

$$\text{OR} = [p_1(1 - p_0)] / [p_0(1 - p_1)].$$

Rearranging terms and substituting  $\text{var}(x) = p(1-p)$  and  $\text{var}(y_{01}) = v(1-v)$ , where  $v$  is the proportion of cases, the OR is given by:

$$\text{OR} = 1 + b_{01} \cdot p(1-p) / [v(1-v)p_2(1-p_1)].$$
